# Supplementary material
Source: PubMed Central journal article supplement (PMC9179150)
Supplement: mmc1.pdf [file mmc1.pdf]

# THE LANCET

## Respiratory Medicine

### Supplementary appendix

This appendix formed part of the original submission and has been peer reviewed. We post it as supplied by the authors.

Supplement to: Shaw RH, Liu X, Stuart ASV, et al. Effect of priming interval on reactogenicity, peak immunological response, and waning after homologous and heterologous COVID-19 vaccine schedules: exploratory analyses of Com-COV, a randomised control trial. *Lancet Respir Med* 2022; published online June 8. [https://doi.org/10.1016/S2213-2600\(22\)00163-1](https://doi.org/10.1016/S2213-2600(22)00163-1).

1 **Supplementary Appendix**

2  
3 **Table of Contents**

4  
5 Supplementary Table 1. Baseline demographics and characteristics by study arm in the immunology cohort.....3  
6 Supplementary Table 2. Immune responses between heterologous and homologous priming schedules at 28 days and 6 months post second dose in the general cohort .....4  
7 Supplementary Table 3. Immunogenicity at 28-day and 3-months post second dose between participants with and without missing data at 6-month post second dose in the 12-  
8 week interval arms.....5  
9 Supplementary Table 4. Immunogenicity against Beta and Delta variants at 28 days post second dose in the general cohort with a 12-week interval .....6  
10 Supplementary Table 5. Baseline demographics and characteristics by study arm for paracetamol sub-study .....7  
11 Supplementary Table 6. Paracetamol usage and impact on daily activity in paracetamol sub-study arms in days 0-7 post-second dose.....8  
12 Supplementary Table 7. Summary of adverse events in the general and immunology cohorts.....9  
13 Supplementary Table 8. Non-serious adverse events of grade  $\geq 3$  .....10  
14 Supplementary Table 9. Adverse events of special interest\* in all study arms .....13  
15 Supplementary Table 10. Serious adverse events in all study arms .....14  
16 Supplementary Table 11. Adverse event of special interest - COVID-19 cases after prime vaccination.....15  
17 Supplementary Table 12. Numbers of participants analysed per timepoint for A) Anti-spike IgG from first dose, B) Anti-spike IgG from second dose, C) T-cell ELISpot from  
18 first dose and D) T-cell ELISpot from second dose .....16  
19 Supplementary Figure 1. Consort Diagram .....17  
20 Supplementary Figure 2. Kinetics of immune response over time with all schedules normalised by time of first dose in the seronegative general cohort A) Anti-spike IgG titre,  
21 B) T-cell ELISpot count .....18  
22 Supplementary Figure 3. Sensitivity analyses for immune responses comparing 4-week and 12-week interval in the general and immunology cohorts.....19  
23 Supplementary Figure 4. Subgroup analyses for immune responses comparing 4-week and 12-week intervals among schedules of A) ChAd/ChAd; B) ChAd/BNT; C)  
24 BNT/BNT; D) BNT/ChAd, at 28 days post second dose in the general cohort .....20  
25 Supplementary Figure 5. Live neutralising antibodies against Victoria, Beta, Delta and Omicron variants at 28 days and 3 months post second dose in the general cohort with  
26 a 12-week interval .....24  
27 Supplementary Figure 6. Correlation between A) WT & Beta VNA, B) WT & Delta VNA, C) WT & Beta Cellular response, and D) WT & Delta Cellular response at 28 days  
28 post boost in the 12-week interval arms .....25  
29 Supplementary Figure 7. Consort of paracetamol sub-study participants .....26  
30 Supplementary Figure 8. Maximum severity of solicited adverse events in the first seven days post- first dose and post-second dose by study arm in the general cohort. A)  
31 Local, and B) Systemic.....27  
32 Supplementary Figure 9. Forest plot of any solicited adverse events in days 0-7 post-second dose comparing heterologous to homologous schedules in the general cohort. A)  
33 4-week interval, and B) 12-week interval.....29  
34 Supplementary Figure 10. Solicited adverse events in days 0-7 post second dose by day and study arm in the 12-week interval groups. A) Local adverse events, and B) Systemic  
35 adverse events.....30  
36 Supplementary Figure 11. Solicited adverse events at time of second dose by paracetamol sub-study arm compared to 4-week interval arms in the general cohort. A) local, B)  
37 systemic .....32  
38 Supplementary Figure 12. Forest plot of any solicited adverse events in days 0-7 post second dose comparing prophylactic to reactive paracetamol use in the paracetamol sub-  
39 study of 12-interval arms for A) ChAd/ChAd; B) ChAd/BNT; C) BNT/BNT; D) BNT/ChAd .....34

|    |                                                                                                                                                                 |    |
|----|-----------------------------------------------------------------------------------------------------------------------------------------------------------------|----|
| 40 | Randomisation and Blinding .....                                                                                                                                | 38 |
| 41 | Summary of correlation factors for calibration of immune assay readouts (LBA and PNA) with the WHO International Standard (IS) for the Nexelis laboratory ..... | 38 |
| 42 | Com-COV Study Group .....                                                                                                                                       | 39 |
| 43 | Statistical Analysis Plan (SAP) .....                                                                                                                           | 41 |
| 44 | Protocol .....                                                                                                                                                  | 54 |
| 45 |                                                                                                                                                                 |    |
| 46 |                                                                                                                                                                 |    |
| 47 |                                                                                                                                                                 |    |
| 48 |                                                                                                                                                                 |    |
| 49 |                                                                                                                                                                 |    |
| 50 |                                                                                                                                                                 |    |
| 51 |                                                                                                                                                                 |    |
| 52 |                                                                                                                                                                 |    |

53 *Supplementary Table 1. Baseline demographics and characteristics by study arm in the immunology cohort*

54

|                                                               | 4-week interval study arms |                    |                   |                    | Overall           |
|---------------------------------------------------------------|----------------------------|--------------------|-------------------|--------------------|-------------------|
|                                                               | ChAd/ChAd<br>(N=23)        | ChAd/BNT<br>(N=22) | BNT/BNT<br>(N=21) | BNT/ChAd<br>(N=24) | (N=90)            |
| <b>Age (years)</b>                                            |                            |                    |                   |                    |                   |
| <b>Mean (SD)</b>                                              | 55.3 (4.29)                | 58.6 (4.59)        | 57.3 (5.02)       | 57.7 (4.73)        | 57.2 (4.74)       |
| <b>Median (range)</b>                                         | 54.8 (50.7, 64.1)          | 59.2 (52.6, 68.3)  | 55.3 (51.0, 67.2) | 56.2 (51.4, 67.0)  | 56.0 (50.7, 68.3) |
| <b>Gender</b>                                                 |                            |                    |                   |                    |                   |
| <b>Female</b>                                                 | 13 (56.5%)                 | 8 (36.4%)          | 10 (47.6%)        | 10 (41.7%)         | 41 (45.6%)        |
| <b>Male</b>                                                   | 10 (43.5%)                 | 14 (63.6%)         | 11 (52.4%)        | 14 (58.3%)         | 49 (54.4%)        |
| <b>Ethnicity</b>                                              |                            |                    |                   |                    |                   |
| <b>White</b>                                                  | 16 (69.6%)                 | 15 (68.2%)         | 14 (66.7%)        | 18 (75.0%)         | 63 (70.0%)        |
| <b>Black</b>                                                  |                            |                    | 2 (9.5%)          |                    | 2 (2.2%)          |
| <b>Asian</b>                                                  | 5 (21.7%)                  | 4 (18.2%)          | 3 (14.3%)         | 4 (16.7%)          | 16 (17.8%)        |
| <b>Mixed</b>                                                  | 2 (8.7%)                   | 3 (13.6%)          | 1 (4.8%)          | 2 (8.3%)           | 8 (8.9%)          |
| <b>Other</b>                                                  |                            |                    | 1 (4.8%)          |                    | 1 (1.1%)          |
| <b>Comorbidities</b>                                          |                            |                    |                   |                    |                   |
| <b>Cardiovascular</b>                                         | 6 (26.1%)                  | 6 (27.3%)          | 9 (42.9%)         | 7 (29.2%)          | 28 (31.1%)        |
| <b>Respiratory</b>                                            | 5 (21.7%)                  | 6 (27.3%)          | 4 (19.0%)         | 5 (20.8%)          | 20 (22.2%)        |
| <b>Diabetes</b>                                               | 5 (21.7%)                  | 1 (4.5%)           | 1 (4.8%)          | 1 (4.2%)           | 8 (8.9%)          |
| <b>Timing of six-month visit<br/>(days since second dose)</b> |                            |                    |                   |                    |                   |
| <b>Mean (SD)</b>                                              | 156 (4)                    | 156 (5)            | 153 (4)           | 155 (5)            | 155 (4)           |
| <b>Median (range)</b>                                         | 154 (152, 165)             | 154 (145, 170)     | 154 (145, 164)    | 154 (148, 165)     | 154 (145, 170)    |

55

56

57

SD: standard deviation.



58  
59

**Supplementary Table 2. Immune responses between heterologous and homologous priming schedules at 28 days and 6 months post second dose in the general cohort**

|                                                                    | ChAdOx1 nCoV-19 arms       |                                     |                  |                            |                                      |                  | P value for interaction <sup>¶</sup> |
|--------------------------------------------------------------------|----------------------------|-------------------------------------|------------------|----------------------------|--------------------------------------|------------------|--------------------------------------|
|                                                                    | ChAd/ChAd<br>N=83          | 4-week interval<br>ChAd/BNT<br>N=83 | GMR <sup>§</sup> | ChAd/ChAd<br>N=89          | 12-week interval<br>ChAd/BNT<br>N=77 | GMR <sup>§</sup> |                                      |
| SARS-CoV-2 anti-spike IgG, ELU/ml, 28-day                          | 1444 (1205-1732) [n=81]    | 12979 (11217-15018) [n=83]          | 9.0 (7.1,11.3)   | 2622 (2152-3195) [n=88]    | 13465 (11391-15917) [n=76]           | 5.2 (4.0,6.7)    | 0.0069                               |
| SARS-CoV-2 anti-spike IgG, ELU/ml, 6-month                         | 334 (271-411) [n=77]       | 2236 (1936-2583) [n=80]             | 6.8 (5.3,8.7)    | 661 (516-847) [n=61]       | 2437 (1957-3035) [n=57]              | 3.8 (2.7,5.3)    | 0.0088                               |
| Pseudotyped virus neutralising antibody, NT <sub>50</sub>          | 74 (63-89) [n=77]          | 529 (450-622) [n=82]                | 7.2 (5.7,9.1)    | 188 (153-231) [n=86]       | 781 (646-946) [n=75]                 | 4.2 (3.1,5.6)    | 0.012                                |
| Cellular response – Fresh (WT), SFC/10 <sup>6</sup> PBMCs, 28-day  | 48 (38-62) [n=79]          | 186 (148-234) [n=83]                | 4.0 (2.8,5.5)    | 35 (27-44) [n=86]          | 110 (83-145) [n=74]                  | 3.2 (2.2,4.6)    | 0.47                                 |
| Cellular response – Fresh (WT), SFC/10 <sup>6</sup> PBMCs, 6-month | 32 (25-41) [n=74]          | 91 (73-114) [n=74]                  | 2.9 (2.0,4.0)    | 17 (12-23) [n=57]          | 54 (41-70) [n=54]                    | 3.2 (2.2,4.8)    | 0.68                                 |
| BNT162b2 arms                                                      |                            |                                     |                  |                            |                                      |                  |                                      |
|                                                                    | BNT/BNT<br>N=84            | 4-week interval<br>BNT/ChAd<br>N=83 | GMR <sup>§</sup> | BNT/BNT<br>N=87            | 12-week interval<br>BNT/ChAd<br>N=78 | GMR <sup>§</sup> |                                      |
| SARS-CoV-2 anti-spike IgG, ELU/ml, 28-day                          | 14349 (12470-16511) [n=84] | 7530 (6811-8325) [n=83]             | 0.52 (0.44,0.62) | 19011 (16468-21947) [n=85] | 10642 (8936-12673) [n=76]            | 0.57 (0.45,0.71) | 0.36                                 |
| SARS-CoV-2 anti-spike IgG, ELU/ml, 6-month                         | 2612 (2258-3022) [n=81]    | 1748 (1477-2068) [n=81]             | 0.66 (0.53,0.82) | 3560 (3009-4213) [n=62]    | 2012 (1595-2539) [n=54]              | 0.57 (0.43,0.76) | 0.51                                 |
| Pseudotyped virus neutralising antibody, NT <sub>50</sub>          | 585 (500-685) [n=83]       | 397 (342-460) [n=82]                | 0.67 (0.54,0.83) | 899 (770-1051) [n=81]      | 645 (529-787) [n=71]                 | 0.72 (0.56,0.92) | 0.5                                  |
| Cellular response – Fresh (WT), SFC/10 <sup>6</sup> PBMCs, 28-day  | 72 (54-95) [n=84]          | 98 (73-131) [n=83]                  | 1.4 (0.93,2.1)   | 49 (37-64) [n=82]          | 37 (28-49) [n=73]                    | 0.80 (0.54,1.2)  | 0.073                                |
| Cellular response – Fresh (WT), SFC/10 <sup>6</sup> PBMCs, 6-month | 35 (26-47) [n=78]          | 52 (40-69) [n=81]                   | 1.5 (0.97,2.2)   | 23 (16-32) [n=55]          | 21 (15-28) [n=52]                    | 0.96 (0.60,1.6)  | 0.14                                 |

60

61 GMR: geometric mean ratio; NT<sub>50</sub>: 50% neutralisation titre; WT: wild-type; SFC: Spot-forming cells; PBMC: Peripheral blood mononuclear cells; ELU/mL: ELISA units per  
62 mL; Data shown are geometric mean (95% Confidence Intervals) in the ITT population;

63

§ GMRs and two-sided 95% CIs were adjusted for study site;

64

¶ p values for interaction between vaccine schedule and vaccine interval were adjusted for study site, age at baseline, sex, ethnicity and paracetamol use on day 0 or day 1 post  
65 vaccination.

66 *Supplementary Table 3. Immunogenicity at 28-day and 3-months post second dose between participants with and without missing data at 6-month post second dose in the*  
 67 *12-week interval arms*  
 68

|                                                | ChAdOx1 nCoV-19 arms          |                               |                              |                               |
|------------------------------------------------|-------------------------------|-------------------------------|------------------------------|-------------------------------|
|                                                | ChAd/ChAd                     |                               | ChAd/BNT                     |                               |
|                                                | With missing data<br>N=20     | With no missing data<br>N=69  | With missing data<br>N=18    | With no missing data<br>N=59  |
| SARS-CoV-2 anti-spike IgG<br>(28-day), ELU/ml  | 1847 (1233-2767) [n=19]       | 2888 (2313-3605) [n=69]       | 10801 (7093-16448)<br>[n=17] | 14349 (12020-17128)<br>[n=59] |
| SARS-CoV-2 anti-spike IgG<br>(3-month), ELU/ml | 1369 (777-2410) [n=16]        | 1417 (1116-1800) [n=69]       | 4007 (2441-6575) [n=17]      | 5365 (4443-6478) [n=59]       |
|                                                | BNT162b2 arms                 |                               |                              |                               |
|                                                | BNT/BNT                       |                               | BNT/ChAd                     |                               |
|                                                | With missing data<br>N=22     | With no missing data<br>N=65  | With missing data<br>N=22    | With no missing data<br>N=56  |
| SARS-CoV-2 anti-spike IgG<br>(28-day), ELU/ml  | 21869 (16491-29000)<br>[n=20] | 18210 (15420-21503)<br>[n=65] | 11800 (8333-16709)<br>[n=21] | 10230 (8354-12528)<br>[n=55]  |
| SARS-CoV-2 anti-spike IgG<br>(3-month), ELU/ml | 8275 (6294-10879) [n=20]      | 7872 (6708-9238) [n=62]       | 4845 (3422-6858) [n=20]      | 4152 (3391-5083) [n=54]       |

69 ELU/mL: ELISA units per mL; Data shown are geometric mean (95% Confidence Intervals) in the ITT population.  
 70  
 71

72  
73

**Supplementary Table 4. Immunogenicity against Beta and Delta variants at 28 days post second dose in the general cohort with a 12-week interval**

|                                                                  | ChAdOx1 nCoV-19 first dose arms |                            | BNT162b2 first dose arms   |                            | p value <sup>¶</sup> |
|------------------------------------------------------------------|---------------------------------|----------------------------|----------------------------|----------------------------|----------------------|
|                                                                  | ChAd/ChAd<br>N=89               | ChAd/BNT<br>N=77           | BNT/BNT<br>N=87            | BNT/ChAd<br>N=78           |                      |
| <b>Live virus neutralising antibody, FRNT<sub>50</sub></b>       |                                 |                            |                            |                            |                      |
| <b>WT</b>                                                        | 252 (174-365) [n=51]            | 1410 (1053-1888)<br>[n=45] | 2392 (1985-2882)<br>[n=47] | 1273 (985-1645)<br>[n=49]  |                      |
| <b>Beta</b>                                                      | 51 (33-79) [n=51]               | 264 (171-406) [n=45]       | 690 (543-876) [n=47]       | 360 (260-498) [n=49]       |                      |
| <i>Beta to Victoria ratio<sup>§</sup></i>                        | 0.29 (0.22-0.39)<br>[n=30]      | 0.22 (0.18-0.28) [n=41]    | 0.29 (0.25-0.34) [n=47]    | 0.29 (0.24-0.35)<br>[n=48] | 0.19                 |
| <b>Delta</b>                                                     | 88 (59-130) [n=51]              | 528 (361-772) [n=45]       | 990 (786-1246) [n=47]      | 498 (370-670) [n=49]       |                      |
| <i>Delta to Victoria ratio<sup>§</sup></i>                       | 0.37 (0.31-0.45)<br>[n=40]      | 0.39 (0.34-0.46) [n=44]    | 0.41 (0.36-0.48) [n=47]    | 0.39 (0.33-0.47)<br>[n=49] | 0.86                 |
| <b>Cellular response – Frozen cells, SFC/10<sup>6</sup> PBMC</b> |                                 |                            |                            |                            |                      |
| <b>WT</b>                                                        | 24 (17-34) [n=60]               | 64 (44-94) [n=56]          | 42 (32-55) [n=55]          | 32 (22-45) [n=52]          |                      |
| <b>Beta</b>                                                      | 26 (19-36) [n=60]               | 70 (51-97) [n=56]          | 42 (32-55) [n=56]          | 29 (21-41) [n=52]          |                      |
| <i>Beta to WT ratio<sup>§</sup></i>                              | 1.1 (0.90-1.4) [n=60]           | 1.1 (0.90-1.3) [n=56]      | 0.99 (0.84-1.2) [n=55]     | 0.92 (0.79-1.1) [n=52]     | 0.43                 |
| <b>Delta</b>                                                     | 26 (19-35) [n=60]               | 71 (52-96) [n=55]          | 44 (34-56) [n=55]          | 28 (20-40) [n=52]          |                      |
| <i>Delta to WT ratio<sup>§</sup></i>                             | 1.1 (0.89-1.3) [n=60]           | 1.0 (0.89-1.2) [n=55]      | 1.0 (0.87-1.2) [n=55]      | 0.89 (0.75-1.1) [n=52]     | 0.46                 |

74

FRNT<sub>50</sub>: 50% focal reduction neutralisation titre; WT: wild-type; SFC: Spot-forming cells; PBMC: Peripheral blood mononuclear cells; Data shown are geometric mean (95% Confidence Intervals) in the ITT population;

76

77

<sup>§</sup> We defined the cross-protection for a strain by the ratio of the immunogenicity against that strain to wild type or Victoria strain; Data presented are geometric mean (95% CI) among participants with data above LLOD;

78

79

<sup>¶</sup> The comparison of cross-protection between schedules was conducted using analysis of variance (ANOVA) to test if there is any difference of the cross-protection between four vaccine schedules.

80

81 *Supplementary Table 5. Baseline demographics and characteristics by study arm for paracetamol sub-study*

82

|                       | ChAd/ChAd              |                      | ChAd/BNT               |                      | BNT/BNT                |                      | BNT/ChAd               |                      |
|-----------------------|------------------------|----------------------|------------------------|----------------------|------------------------|----------------------|------------------------|----------------------|
|                       | Prophylactic<br>(N=40) | Reactive<br>(N=40)   | Prophylactic<br>(N=41) | Reactive<br>(N=39)   | Prophylactic<br>(N=41) | Reactive<br>(N=39)   | Prophylactic<br>(N=36) | Reactive<br>(N=36)   |
| <b>Age (years)</b>    |                        |                      |                        |                      |                        |                      |                        |                      |
| <b>Mean (SD)</b>      | 57.0 (4.43)            | 58.0 (5.54)          | 58.6 (4.53)            | 58.7 (4.42)          | 57.5 (4.27)            | 58.4 (4.67)          | 59.2 (5.01)            | 57.2 (4.47)          |
| <b>Median (range)</b> | 57.7 (50.3,<br>66.3)   | 57.3 (50.1,<br>70.0) | 58.2 (51.1,<br>68.0)   | 58.7 (51.2,<br>72.7) | 57.0 (50.1,<br>67.6)   | 57.8 (50.5,<br>69.8) | 59.7 (50.9,<br>69.8)   | 57.1 (51.0,<br>68.0) |
| <b>Gender</b>         |                        |                      |                        |                      |                        |                      |                        |                      |
| <b>Female</b>         | 23 (57.5%)             | 15 (37.5%)           | 14 (34.1%)             | 18 (46.2%)           | 21 (51.2%)             | 15 (38.5%)           | 13 (36.1%)             | 12 (33.3%)           |
| <b>Male</b>           | 17 (42.5%)             | 25 (62.5%)           | 27 (65.9%)             | 21 (53.8%)           | 20 (48.8%)             | 24 (61.5%)           | 23 (63.9%)             | 24 (66.7%)           |
| <b>Ethnicity</b>      |                        |                      |                        |                      |                        |                      |                        |                      |
| <b>White</b>          | 31 (77.5%)             | 33 (82.5%)           | 31 (75.6%)             | 34 (87.2%)           | 34 (82.9%)             | 31 (79.5%)           | 31 (86.1%)             | 30 (83.3%)           |
| <b>Black</b>          | 1 (2.5%)               | 1 (2.5%)             | 1 (2.4%)               | -                    | 1 (2.4%)               | -                    | -                      | -                    |
| <b>Asian</b>          | 4 (10.0%)              | 3 (7.5%)             | 5 (12.2%)              | 3 (7.7%)             | 2 (4.9%)               | 5 (12.8%)            | 3 (8.3%)               | 3 (8.3%)             |
| <b>Mixed</b>          | 2 (5.0%)               | 3 (7.5%)             | 3 (7.3%)               | 2 (5.1%)             | 2 (4.9%)               | 2 (5.1%)             | -                      | 2 (5.6%)             |
| <b>Other</b>          | 2 (5.0%)               | -                    | 1 (2.4%)               | -                    | 2 (4.9%)               | 1 (2.6%)             | 2 (5.6%)               | 1 (2.8%)             |
| <b>Comorbidities</b>  |                        |                      |                        |                      |                        |                      |                        |                      |
| <b>Cardiovascular</b> | 8 (20.0%)              | 8 (20.0%)            | 9 (22.0%)              | 10 (25.6%)           | 7 (17.1%)              | 8 (20.5%)            | 11 (30.6%)             | 5 (13.9%)            |
| <b>Respiratory</b>    | 3 (7.5%)               | 2 (5.0%)             | 5 (12.2%)              | 5 (12.8%)            | 6 (14.6%)              | 5 (12.8%)            | 3 (8.3%)               | 3 (8.3%)             |
| <b>Diabetes</b>       | 1 (2.5%)               | 1 (2.5%)             | -                      | 1 (2.6%)             | -                      | 1 (2.6%)             | 1 (2.8%)               | 1 (2.8%)             |

83

84

SD: standard deviation.

85

86

87

88

89

90

91

92

93

94

95

96

97

98

99 *Supplementary Table 6. Paracetamol usage and impact on daily activity in paracetamol sub-study arms in days 0-7 post-second dose*  
 100

|                                                                              | ChAd/ChAd              |                    | ChAd/BNT               |                    | BNT/BNT                |                    | BNT/ChAd               |                    |
|------------------------------------------------------------------------------|------------------------|--------------------|------------------------|--------------------|------------------------|--------------------|------------------------|--------------------|
|                                                                              | Prophylactic<br>(N=40) | Reactive<br>(N=40) | Prophylactic<br>(N=41) | Reactive<br>(N=39) | Prophylactic<br>(N=41) | Reactive<br>(N=39) | Prophylactic<br>(N=36) | Reactive<br>(N=36) |
| <b>Number of participants with e-diary data*</b>                             | 39                     | 40                 | 39                     | 39                 | 41                     | 38                 | 34                     | 36                 |
| <b>At least one dose of paracetamol</b>                                      |                        |                    |                        |                    |                        |                    |                        |                    |
| Day 0                                                                        | 37 (94.9%)             | 7 (17.5%)          | 33 (84.6%)             | 4 (10.3%)          | 40 (97.6%)             | 6 (15.8%)          | 32 (94.1%)             | 10 (27.8%)         |
| Day 1                                                                        | 28 (71.8%)             | 14 (35.0%)         | 26 (66.7%)             | 18 (46.2%)         | 30 (73.2%)             | 9 (23.7%)          | 30 (88.2%)             | 22 (61.1%)         |
| Day 2                                                                        | 11 (28.2%)             | 7 (17.5%)          | 11 (28.2%)             | 5 (12.8%)          | 11 (26.8%)             | 4 (10.5%)          | 8 (23.5%)              | 8 (22.2%)          |
| Day 3                                                                        | 8 (20.5%)              | 4 (10.0%)          | 4 (10.3%)              | 3 (7.7%)           | 4 (9.8%)               | 2 (5.3%)           | 2 (5.9%)               | 3 (8.3%)           |
| Day 4                                                                        | 4 (10.3%)              | 3 (7.5%)           | 3 (7.7%)               | 2 (5.1%)           | 4 (9.8%)               | 1 (2.6%)           | 2 (5.9%)               | 1 (2.8%)           |
| Day 5                                                                        | 4 (10.3%)              | 3 (7.5%)           | 4 (10.3%)              | 3 (7.7%)           | 2 (4.9%)               | 3 (7.9%)           | 2 (5.9%)               | 1 (2.8%)           |
| Day 6                                                                        | 2 (5.1%)               | 1 (2.5%)           | 3 (7.7%)               | 1 (2.6%)           | 2 (4.9%)               | -                  | 2 (5.9%)               | -                  |
| Day 7                                                                        | 2 (5.1%)               | 2 (5.0%)           | 2 (5.1%)               | -                  | 2 (4.9%)               | -                  | 1 (2.9%)               | 1 (2.8%)           |
| Any in days 0-1                                                              | 38 (97.4%)             | 18 (45.0%)         | 35 (89.7%)             | 20 (51.3%)         | 40 (97.6%)             | 12 (31.6%)         | 32 (94.1%)             | 24 (66.7%)         |
| Any in days 0-7                                                              | 38 (97.4%)             | 20 (50.0%)         | 36 (92.3%)             | 21 (53.8%)         | 40 (97.6%)             | 14 (36.8%)         | 32 (94.1%)             | 26 (72.2%)         |
| <b>Impact on daily activity</b>                                              |                        |                    |                        |                    |                        |                    |                        |                    |
| At least one day where daily activity was impacted                           | 7 (17.9%)              | 8 (20.0%)          | 8 (20.5%)              | 7 (17.9%)          | 6 (14.6%)              | 3 (7.9%)           | 10 (29.4%)             | 13 (36.1%)         |
| Needed more help than usual to perform daily activities, median (IQR) (days) | 0 (0, 0)               | 0 (0, 0)           | 0 (0, 0)               | 0 (0, 0)           | 0 (0, 0)               | 0 (0, 0)           | 0 (0, 0)               | 0 (0, 0)           |
| Not able to work as planned†, median (IQR) (days)                            | 0 (0, 0)               | 0 (0, 0)           | 0 (0, 0)               | 0 (0, 0)           | 0 (0, 0)               | 0 (0, 0)           | 0 (0, 0)               | 0 (0, 1)           |
| Sought medical attention or advice due to symptoms, median (IQR) (days)      | 0 (0, 0)               | 0 (0, 0)           | 0 (0, 0)               | 0 (0, 0)           | 0 (0, 0)               | 0 (0, 0)           | 0 (0, 0)               | 0 (0, 0)           |

101  
 102 IQR: interquartile range.  
 103 \*Results are based on those with completed e-diary data.  
 104 †Denominator is all participants randomised to study arm including those who answered 'not applicable' to work question.

105  
106

*Supplementary Table 7. Summary of adverse events in the general and immunology cohorts*

|                                                                      | 4-week interval arms |                     |                    |                     | 12-week interval arms |                    |                   |                    | Total<br>(N=830) |
|----------------------------------------------------------------------|----------------------|---------------------|--------------------|---------------------|-----------------------|--------------------|-------------------|--------------------|------------------|
|                                                                      | ChAd/ChAd<br>(N=115) | ChAd/BNT<br>(N=114) | BNT/BNT<br>(N=119) | BNT/ChAd<br>(N=115) | ChAd/ChAd<br>(N=92)   | ChAd/BNT<br>(N=90) | BNT/BNT<br>(N=93) | BNT/ChAd<br>(N=92) |                  |
| <b>Number of adverse events*</b>                                     | 127                  | 133                 | 158                | 154                 | 99                    | 113                | 98                | 122                | 1004             |
| <b>Number of unique participants with at least one adverse event</b> | 64 (55.6%)           | 68 (59.6%)          | 61 (51.2%)         | 67 (58.2%)          | 54 (58.7%)            | 55 (61.1%)         | 40 (43.0%)        | 53 (57.6%)         | 462 (48.1%)      |
| <b>Timing of AE</b>                                                  |                      |                     |                    |                     |                       |                    |                   |                    |                  |
| Between first and second doses                                       | 53 (43.1%)           | 54 (42.5%)          | 59 (38.3%)         | 61 (42.4%)          | 52 (57.1%)            | 63 (57.8%)         | 50 (53.2%)        | 61 (51.7%)         | 453 (47.2%)      |
| Post 1 <sup>st</sup> dose†                                           | 3 (2.4%)             |                     |                    |                     |                       |                    |                   | 4 (3.4%)           | 7 (0.7%)         |
| Post 2 <sup>nd</sup> dose                                            | 71 (57.7%)           | 79 (62.2%)          | 99 (64.3%)         | 93 (64.6%)          | 47 (51.6%)            | 50 (45.9%)         | 48 (51.1%)        | 57 (48.3%)         | 544 (56.7%)      |
| <b>Severity</b>                                                      |                      |                     |                    |                     |                       |                    |                   |                    |                  |
| Grade 1                                                              | 57 (46.3%)           | 80 (63.0%)          | 80 (51.9%)         | 69 (47.9%)          | 57 (62.6%)            | 63 (57.8%)         | 60 (63.8%)        | 68 (57.6%)         | 534 (55.6%)      |
| Grade 2                                                              | 56 (45.5%)           | 41 (32.3%)          | 71 (46.1%)         | 74 (51.4%)          | 33 (36.3%)            | 42 (38.5%)         | 30 (31.9%)        | 42 (35.6%)         | 389 (40.5%)      |
| Grade 3                                                              | 13 (10.6%)           | 10 (7.9%)           | 6 (3.9%)           | 10 (6.9%)           | 9 (9.9%)              | 8 (7.3%)           | 7 (7.4%)          | 11 (9.3%)          | 74 (7.7%)        |
| Grade 4                                                              | 1 (0.8%)             | 2 (1.6%)            | 1 (0.6%)           | 1 (0.7%)            |                       |                    | 1 (1.1%)          | 1 (0.8%)           | 7 (0.7%)         |
| <b>Causality</b>                                                     |                      |                     |                    |                     |                       |                    |                   |                    |                  |
| No relationship                                                      | 62 (50.4%)           | 49 (38.6%)          | 58 (37.7%)         | 52 (36.1%)          | 45 (49.5%)            | 48 (44.0%)         | 50 (53.2%)        | 63 (53.4%)         | 427 (44.5%)      |
| Unlikely                                                             | 42 (34.1%)           | 52 (40.9%)          | 53 (34.4%)         | 64 (44.4%)          | 30 (33.0%)            | 31 (28.4%)         | 29 (30.9%)        | 32 (27.1%)         | 333 (34.7%)      |
| Possible                                                             | 13 (10.6%)           | 16 (12.6%)          | 38 (24.7%)         | 23 (16.0%)          | 5 (5.5%)              | 17 (15.6%)         | 11 (11.7%)        | 16 (13.6%)         | 139 (14.5%)      |
| Probable                                                             | 5 (4.1%)             | 9 (7.1%)            | 8 (5.2%)           | 11 (7.6%)           | 14 (15.4%)            | 14 (12.8%)         | 7 (7.4%)          | 9 (7.6%)           | 77 (8.0%)        |
| Definite                                                             | 5 (4.1%)             | 7 (5.5%)            | 1 (0.6%)           | 4 (2.8%)            | 5 (5.5%)              | 3 (2.8%)           | 1 (1.1%)          | 2 (1.7%)           | 28 (2.9%)        |

107  
108  
109  
110  
111  
112  
113  
114  
115  
116  
117  
118  
119  
120  
121

\*Denominator for percentage calculations. †Did not receive second dose.

122 **Supplementary Table 8. Non-serious adverse events of grade  $\geq 3$**

123

| ID | Study Arm         | Severity | Causality       | Days since first dose | Days since second dose | MedDRA Preferred Term        | MedDRA System Order Class                            |
|----|-------------------|----------|-----------------|-----------------------|------------------------|------------------------------|------------------------------------------------------|
| 1  | ChAd/ChAd 4-week  | Grade 3  | Unlikely        | 33                    | 5                      | Migraine                     | Vascular disorders                                   |
| 2  | ChAd/ChAd 4-week  | Grade 3  | No relationship | 67                    | 39                     | Chest pain                   | General disorders and administration site conditions |
| 3  | ChAd/ChAd 4-week  | Grade 3  | No relationship | 1                     |                        | Back pain                    | Musculoskeletal and connective tissue disorders      |
| 4  | ChAd/ChAd 4-week  | Grade 3  | No relationship | 0                     |                        | Cold type haemolytic anaemia | Immune system disorders                              |
| 5  | ChAd/ChAd 4-week  | Grade 3  | Possible        | 53                    | 23                     | Pain in extremity            | Musculoskeletal and connective tissue disorders      |
| 6  | ChAd/ChAd 4-week  | Grade 3  | Unlikely        | 48                    | 19                     | Headache                     | Nervous system disorders                             |
| 7  | ChAd/ChAd 4-week  | Grade 3  | No relationship | 206                   | 176                    | Post viral fatigue syndrome  | Nervous system disorders                             |
| 8  | ChAd/ChAd 4-week  | Grade 3  | No relationship | 32                    | 3                      | Limb injury                  | Injury, poisoning and procedural complications       |
| 9  | ChAd/ChAd 4-week  | Grade 3  | No relationship | 182                   | 153                    | Infected dermal cyst         | Infections and infestations                          |
| 10 | ChAd/ChAd 4-week  | Grade 3  | No relationship | 3                     |                        | Environmental exposure~      | Injury, poisoning and procedural complications       |
| 11 | ChAd/ChAd 4-week  | Grade 3  | Possible        | 0                     |                        | Fatigue                      | General disorders and administration site conditions |
| 12 | ChAd/ChAd 4-week  | Grade 3  | No relationship | 55                    | 27                     | Back pain                    | Musculoskeletal and connective tissue disorders      |
| 13 | ChAd/ChAd 4-week  | Grade 3  | No relationship | 27                    |                        | Glaucoma                     | Eye disorders                                        |
| 14 | ChAd/ChAd 12-week | Grade 3  | No relationship | 99                    | 15                     | Bunion operation             | Surgical and medical procedures                      |
| 15 | ChAd/ChAd 12-week | Grade 3  | No relationship | 257                   | 173                    | Coronavirus infections       | Infections and infestations                          |
| 16 | ChAd/ChAd 12-week | Grade 3  | No relationship | 31                    |                        | Tonsillitis                  | Infections and infestations                          |
| 17 | ChAd/ChAd 12-week | Grade 3  | No relationship | 81                    |                        | Tooth abscess                | Infections and infestations                          |
| 18 | ChAd/ChAd 12-week | Grade 3  | No relationship | 62                    |                        | Thyroid mass                 | Endocrine disorders                                  |
| 19 | ChAd/ChAd 12-week | Grade 3  | No relationship | 103                   | 19                     | Vertigo                      | Ear and labyrinth disorders                          |
| 20 | ChAd/ChAd 12-week | Grade 3  | Unlikely        | 244                   | 160                    | Abdominal pain               | Gastrointestinal disorders                           |
| 21 | ChAd/ChAd 12-week | Grade 3  | No relationship | 93                    | 9                      | Migraine                     | Vascular disorders                                   |
| 22 | ChAd/BNT 4-week   | Grade 3  | Definite        | 0                     |                        | Chills§                      | General disorders and administration site conditions |
| 23 | ChAd/BNT 4-week   | Grade 3  | Unlikely        | 92                    | 64                     | Deep vein thrombosis         | Vascular disorders                                   |
| 24 | ChAd/BNT 4-week   | Grade 3  | Probable        | 1                     |                        | Meniere's disease            | Ear and labyrinth disorders                          |
| 25 | ChAd/BNT 4-week   | Grade 3  | No relationship | 43                    | 15                     | Back Pain                    | Musculoskeletal and connective tissue disorders      |

|    |                  |         |                 |     |     |                             |                                                                     |
|----|------------------|---------|-----------------|-----|-----|-----------------------------|---------------------------------------------------------------------|
| 26 | ChAd/BNT 4-week  | Grade 3 | No relationship | 100 | 72  | Basal cell carcinoma        | Neoplasms benign, malignant and unspecified (incl cysts and polyps) |
| 27 | ChAd/BNT 4-week  | Grade 3 | Unlikely        | 15  |     | Fatigue                     | General disorders and administration site conditions                |
| 28 | ChAd/BNT 4-week  | Grade 3 | No relationship | 56  | 28  | Abdominal pain              | Gastrointestinal disorders                                          |
| 29 | ChAd/BNT 4-week  | Grade 3 | No relationship | 38  | 10  | Headache                    | Nervous system disorders                                            |
| 30 | ChAd/BNT 4-week  | Grade 3 | No relationship | 43  | 14  | Foot fracture               | Musculoskeletal and connective tissue disorders                     |
| 31 | ChAd/BNT 4-week  | Grade 3 | Unlikely        | 48  | 20  | Fatigue                     | General disorders and administration site conditions                |
| 32 | ChAd/BNT 12-week | Grade 3 | No relationship | 108 | 25  | Cluster headache            | Nervous system disorders                                            |
| 33 | ChAd/BNT 12-week | Grade 3 | No relationship | 165 | 82  | Radioactive iodine therapy  | Surgical and medical procedures                                     |
| 34 | ChAd/BNT 12-week | Grade 3 | Unlikely        | 58  |     | Periarthritis               | Musculoskeletal and connective tissue disorders                     |
| 35 | ChAd/BNT 12-week | Grade 3 | No relationship | 8   |     | Urinary tract infection     | Infections and infestations                                         |
| 36 | ChAd/BNT 12-week | Grade 3 | No relationship | 109 | 25  | Respiratory tract infection | Infections and infestations                                         |
| 37 | ChAd/BNT 12-week | Grade 3 | Unlikely        | 136 | 52  | Renal mass                  | Renal and urinary disorders                                         |
| 38 | ChAd/BNT 12-week | Grade 3 | Unlikely        | 101 | 17  | Lethargy                    | General disorders and administration site conditions                |
| 39 | ChAd/BNT 12-week | Grade 3 | Possible        | 0   |     | Tremor                      | Nervous system disorders                                            |
| 40 | BNT/BNT 4-week   | Grade 3 | No relationship | 166 | 138 | Hypertension                | Vascular disorders                                                  |
| 41 | BNT/BNT 4-week   | Grade 3 | No relationship | 26  |     | Pneumonia                   | Infections and infestations                                         |
| 42 | BNT/BNT 4-week   | Grade 3 | Unlikely        | 3   |     | Coronavirus infections      | Infections and infestations                                         |
| 43 | BNT/BNT 4-week   | Grade 3 | No relationship | 48  | 20  | Rotator cuff syndrome       | Injury, poisoning and procedural complications                      |
| 44 | BNT/BNT 4-week   | Grade 3 | No relationship | 10  |     | Bursitis                    | Musculoskeletal and connective tissue disorders                     |
| 45 | BNT/BNT 4-week   | Grade 3 | No relationship | 211 | 181 | Road traffic accident       | Injury, poisoning and procedural complications                      |
| 46 | BNT/BNT 12-week  | Grade 3 | Unlikely        | 62  |     | Depressed mood              | Psychiatric disorders                                               |
| 47 | BNT/BNT 12-week  | Grade 3 | Unlikely        | 89  | 5   | Diarrhoea                   | Gastrointestinal disorders                                          |
| 48 | BNT/BNT 12-week  | Grade 3 | Unlikely        | 102 | 16  | Sinusitis                   | Respiratory, thoracic and mediastinal disorders                     |
| 49 | BNT/BNT 12-week  | Grade 3 | Unlikely        | 104 | 20  | Vertigo                     | Ear and labyrinth disorders                                         |
| 50 | BNT/BNT 12-week  | Grade 3 | No relationship | 2   |     | Rotator cuff repair         | Surgical and medical procedures                                     |
| 51 | BNT/BNT 12-week  | Grade 3 | No relationship | 109 | 23  | Tooth extraction            | Surgical and medical procedures                                     |
| 52 | BNT/ChAd 4-week  | Grade 3 | Probable        | 29  | 1   | Decreased appetite          | Metabolism and nutrition disorders                                  |
| 53 | BNT/ChAd 4-week  | Grade 3 | Probable        | 31  | 1   | Migraine                    | Vascular disorders                                                  |



|    |                  |         |                 |     |    |                                   |                                                      |
|----|------------------|---------|-----------------|-----|----|-----------------------------------|------------------------------------------------------|
| 54 | BNT/ChAd 4-week  | Grade 3 | No relationship | 44  | 16 | Pyrexia                           | General disorders and administration site conditions |
| 55 | BNT/ChAd 4-week  | Grade 3 | Unlikely        | 47  | 19 | Fatigue                           | General disorders and administration site conditions |
| 56 | BNT/ChAd 4-week  | Grade 3 | No relationship | 28  | 0  | Depressed mood                    | Psychiatric disorders                                |
| 57 | BNT/ChAd 4-week  | Grade 3 | No relationship | 92  | 64 | Hypersensitivity                  | Immune system disorders                              |
| 58 | BNT/ChAd 4-week  | Grade 3 | Probable        | 28  | 0  | Arthralgia                        | Musculoskeletal and connective tissue disorders      |
| 59 | BNT/ChAd 4-week  | Grade 3 | Unlikely        | 45  | 17 | Headache                          | Nervous system disorders                             |
| 60 | BNT/ChAd 4-week  | Grade 3 | Unlikely        | 45  | 17 | Viral infection*                  | Infections and infestations                          |
| 61 | BNT/ChAd 4-week  | Grade 3 | Possible        | 33  | 5  | Back Pain                         | Musculoskeletal and connective tissue disorders      |
| 62 | BNT/ChAd 12-week | Grade 3 | No relationship | 87  | 3  | Melanocytic naevus                | Skin and subcutaneous tissue disorders               |
| 63 | BNT/ChAd 12-week | Grade 3 | Possible        | 84  | 1  | Tachycardia                       | Cardiac disorders                                    |
| 64 | BNT/ChAd 12-week | Grade 3 | No relationship | 80  |    | Skin injury                       | Injury, poisoning and procedural complications       |
| 65 | BNT/ChAd 12-week | Grade 3 | No relationship | 91  | 0  | Trigmeinal palsy                  | Nervous system disorders                             |
| 66 | BNT/ChAd 12-week | Grade 4 | No relationship | 56  |    | Transurethral prostatectomy       | Surgical and medical procedures                      |
| 67 | BNT/ChAd 12-week | Grade 3 | Probable        | 85  | 0  | Ear pain                          | Ear and labyrinth disorders                          |
| 68 | BNT/ChAd 12-week | Grade 3 | Unlikely        | 104 | 19 | Upper respiratory tract infection | Infections and infestations                          |
| 69 | BNT/ChAd 12-week | Grade 3 | Probable        | 84  | 0  | Sinus headache                    | Respiratory, thoracic and mediastinal disorders      |
| 70 | BNT/ChAd 12-week | Grade 3 | No relationship | 40  |    | Ligament sprain                   | Injury, poisoning and procedural complications       |
| 71 | BNT/ChAd 12-week | Grade 3 | Unlikely        | 14  |    | Anaphylactoid reaction            | Immune system disorders                              |
| 72 | BNT/ChAd 12-week | Grade 3 | No relationship | 99  |    | Knee arthroplasty                 | Surgical and medical procedures                      |

124

125 ~ Participant developed respiratory irritation after performing DIY

126 § Episode of rigors with fever, entered in unsolicited diary

127 \* Tested for COVID-19 and negative

128 **Supplementary Table 9. Adverse events of special interest\* in all study arms**

129

| <b>ID</b> | <b>Study arm</b> | <b>Severity</b> | <b>Causality</b> | <b>Serious AE</b>     | <b>Days to onset since first dose</b> | <b>Days to onset since second dose</b> | <b>MedDRA Preferred Term</b> | <b>MedDRA System Order Class</b> |
|-----------|------------------|-----------------|------------------|-----------------------|---------------------------------------|----------------------------------------|------------------------------|----------------------------------|
| 1         | ChAd/BNT 4-week  | Grade 3         | Unlikely         | No                    | 92                                    | 64                                     | Deep vein thrombosis         | Vascular disorders               |
| 2         | ChAd/BNT 4-week  | Grade 4         | Unlikely         | Yes - hospitalisation | 84                                    | 56                                     | Cardiac failure <sup>#</sup> | Cardiac disorders                |
| 3         | BNT/ChAd 4-week  | Grade 3         | No relationship  | No                    | 92                                    | 64                                     | Hypersensitivity             | Immune system disorders          |
| 4         | BNT/ChAd 12-week | Grade 3         | No relationship  | No                    | 91                                    | 0                                      | Trigeminal palsy             | Nervous system disorders         |
| 5         | BNT/ChAd 12-week | Grade 3         | Unlikely         | No                    | 14                                    |                                        | Anaphylactoid reaction       | Immune system disorders          |

130

131 \* Excluding SARS-CoV-2 infection/COVID-19

132 <sup>#</sup>Ongoing at time of data-lock

133

134

135

136

137

138

139

140

141

142

143

144

145

146

147

148

149

150

151

152

153

154

155

156

157 *Supplementary Table 10. Serious adverse events in all study arms*

158

| ID | Study arm         | Severity | Causality       | Serious adverse event      | Days to onset since first dose | Days to onset since second dose | MedDRA Preferred Term | MedDRA System Order Class                       |
|----|-------------------|----------|-----------------|----------------------------|--------------------------------|---------------------------------|-----------------------|-------------------------------------------------|
| 1  | ChAd/ChAd 4-week  | Grade 4  | Unlikely        | Hospitalisation            | 7                              |                                 | Arthritis bacterial   | Infections and infestations                     |
| 2  | ChAd/ChAd 12-week | Grade 2  | Unlikely        | Hospitalisation            | 106                            | 22                              | Orchitis              | Reproductive system and breast disorders        |
| 3  | ChAd/ChAd 12-week | Grade 3  | No relationship | Hospitalisation            | 85                             | ^                               | Tubo-ovarian abscess  | Infections and infestations                     |
| 4  | ChAd/BNT 4-week   | Grade 4  | No relationship | An important medical event | 144                            | 116                             | Cellulitis            | Infections and infestations                     |
| 5  | ChAd/BNT 4-week   | Grade 4  | Unlikely        | Hospitalisation            | 84                             | 56                              | Cardiac failure       | Cardiac disorders                               |
| 6  | BNT/BNT 4-week    | Grade 4  | No relationship | Hospitalisation            | 265                            | 236                             | Ankle fracture        | Musculoskeletal and connective tissue disorders |
| 7  | BNT/BNT 12-week   | Grade 4  | No relationship | Hospitalisation            | 88                             | 0                               | Acute kidney injury   | Renal and urinary disorders                     |
| 8  | BNT/BNT 12-week   | Grade 3  | No relationship | An important medical event | 197                            | 113                             | Joint dislocation     | Musculoskeletal and connective tissue disorders |
| 9  | BNT/ChAd 4-week   | Grade 4  | No relationship | Hospitalisation            | 109                            | 81                              | Clavicle fracture     | Musculoskeletal and connective tissue disorders |
| 10 | BNT/ChAd 4-week   | Grade 2  | No relationship | Hospitalisation            | 132                            | 104                             | Hand fracture         | Musculoskeletal and connective tissue disorders |
| 11 | BNT/ChAd 12-week  | Grade 3  | Possible        | An important medical event | 113                            | 29                              | IgA nephropathy       | Immune system disorders                         |

159

160 See protocol for causality assessment guidance

161 ^Second dose at D94

162 **Supplementary Table 11. Adverse event of special interest - COVID-19 cases after prime vaccination**  
 163

| ID | Study arm     | Severit | Causality | Days to onset <sup>±</sup> since first | Days to onset <sup>±</sup> since | Date of |
|----|---------------|---------|-----------|----------------------------------------|----------------------------------|---------|
| 1  | ChAd/ChAd 4-  | Grade 1 | No        | 149                                    | 121                              | 07/2021 |
| 2  | ChAd/ChAd 4-  | Grade 2 | No        | 145                                    | 117                              | 07/2021 |
| 3  | ChAd/ChAd 4-  | Grade 1 | No        | 219                                    | 191                              | 09/2021 |
| 4  | ChAd/ChAd 4-  | Grade 2 | No        | 124                                    | 96                               | 06/2021 |
| 5  | ChAd/ChAd 4-  | Grade 1 | No        | 193                                    | 165                              | 08/2021 |
| 6  | ChAd/ChAd 4-  | Grade 1 | No        | 215                                    | 187                              | 09/2021 |
| 7  | ChAd/ChAd 12- | Grade 3 | No        | 257                                    | 173                              | 10/2021 |
| 8  | ChAd/ChAd 12- | Grade 2 | Unlikely  | 194                                    | 110                              | 08/2021 |
| 9  | ChAd/ChAd 12- | Grade 2 | No        | 228                                    | 144                              | 10/2021 |
| 10 | ChAd/ChAd 12- | Grade 1 | No        | 191                                    | 105                              | 08/2021 |
| 11 | ChAd/ChAd 12- | Grade 1 | Unlikely  | 225                                    | 140                              | 09/2021 |
| 12 | ChAd/BNT 4-   | Grade 1 | No        | 188                                    | 160                              | 08/2021 |
| 13 | ChAd/BNT 4-   | Grade 1 | No        | 210                                    | 182                              | 09/2021 |
| 14 | ChAd/BNT 4-   | Grade 1 | No        | 149                                    | 121                              | 07/2021 |
| 15 | ChAd/BNT 4-   | Grade 2 | No        | 53 <sup>^</sup>                        |                                  | 04/2021 |
| 16 | ChAd/BNT 4-   | Grade 2 | Unlikely  | 139                                    | 111                              | 07/2021 |
| 17 | ChAd/BNT 12-  | Grade 1 | No        | 265                                    | 181                              | 11/2021 |
| 18 | ChAd/BNT 12-  | Grade 2 | Unlikely  | 256                                    | 172                              | 11/2021 |
| 19 | ChAd/BNT 12-  | Grade 2 | No        | 210                                    | 126                              | 09/2021 |
| 20 | ChAd/BNT 12-  | Grade 2 | No        | 247                                    | 161                              | 10/2021 |
| 21 | ChAd/BNT 12-  | Grade 2 | No        | 265                                    | 179                              | 11/2021 |
| 22 | BNT/ChAd 4-   | Grade 1 | No        | 177                                    | 149                              | 08/2021 |
| 23 | BNT/ChAd 4-   | Grade 1 | Unlikely  | 169                                    | 141                              | 08/2021 |
| 24 | BNT/ChAd 4-   | Grade 2 | Unlikely  | 196                                    | 168                              | 08/2021 |
| 25 | BNT/ChAd 4-   | Grade 1 | No        | 156                                    | 128                              | 07/2021 |
| 26 | BNT/ChAd 4-   | Grade 2 | No        | 235                                    | 207                              | 10/2021 |
| 27 | BNT/ChAd 12-  | Grade 1 | No        | 253                                    | 169                              | 10/2021 |
| 28 | BNT/ChAd 12-  | Grade 1 | No        | 196                                    | 112                              | 08/2021 |
| 29 | BNT/ChAd 12-  | Grade 2 | No        | 6                                      |                                  | 02/2021 |
| 30 | BNT/BNT 4-    | Grade 3 | Unlikely  | 3                                      |                                  | 02/2021 |
| 31 | BNT/BNT 4-    | Grade 2 | No        | 228                                    | 200                              | 10/2021 |
| 32 | BNT/BNT 4-    | Grade 1 | No        | 148                                    | 120                              | 07/2021 |
| 33 | BNT/BNT 4-    | Grade 1 | No        | 179                                    | 151                              | 08/2021 |
| 34 | BNT/BNT 4-    | Grade 1 | No        | 245                                    | 216                              | 10/2021 |
| 35 | BNT/BNT 4-    | Grade 2 | Unlikely  | 4                                      |                                  | 02/2021 |
| 36 | BNT/BNT 4-    | Grade 1 | No        | 142                                    | 114                              | 07/2021 |
| 37 | BNT/BNT 4-    | Grade 2 | Unlikely  | 160                                    | 132                              | 07/2021 |
| 38 | BNT/BNT 12-   | Grade 1 | No        | 147                                    | 62                               | 07/2021 |
| 39 | BNT/BNT 12-   | Grade 2 | No        | 177                                    | 92                               | 08/2021 |
| 40 | BNT/BNT 12-   | Grade 1 | No        | 252                                    | 166                              | 10/2021 |

164  
 165 Severity grading as per protocol.

166 <sup>^</sup> Participant had not received second dose prior to infection, dose delayed due to travel

167 <sup>±</sup> Defined by first symptom meeting government testing criteria at that time (<https://www.gov.uk/get-coronavirus-test>) or by self-reported test positivity, whichever was earlier.

169 Cases included in this table include both symptomatic and asymptomatic cases.

170

171 *Supplementary Table 12. Numbers of participants analysed per timepoint for A) Anti-spike IgG from first dose,*  
 172 *B) Anti-spike IgG from second dose, C) T-cell ELISpot from first dose and D) T-cell ELISpot from second dose*  
 173

| A<br>Arm     | Timepoint from first dose |     |     |     |     |     |     |     |
|--------------|---------------------------|-----|-----|-----|-----|-----|-----|-----|
|              | 0                         | 28  | 56  | 84  | 112 | 182 | 240 | 264 |
| ChAd-ChAd-28 | 79                        | 78  | 76  | 0   | 0   | 73  | 34  | 0   |
| ChAd-BNT-28  | 81                        | 82  | 82  | 0   | 0   | 79  | 36  | 0   |
| BNT-BNT-28   | 82                        | 82  | 82  | 0   | 0   | 79  | 29  | 0   |
| BNT-ChAd-28  | 82                        | 82  | 81  | 0   | 0   | 80  | 32  | 0   |
| ChAd-ChAd-84 | 88                        | 0   | 89  | 89  | 88  | 85  | 0   | 61  |
| ChAd-BNT-84  | 76                        | 0   | 76  | 77  | 75  | 76  | 0   | 57  |
| BNT-BNT-84   | 87                        | 0   | 87  | 87  | 85  | 82  | 0   | 62  |
| BNT-ChAd-84  | 78                        | 0   | 78  | 77  | 76  | 74  | 0   | 54  |
| <b>Total</b> | 653                       | 324 | 651 | 330 | 324 | 628 | 131 | 234 |

174

| B<br>Arm     | Timepoint from second dose |     |     |     |     |     |
|--------------|----------------------------|-----|-----|-----|-----|-----|
|              | 0                          | 28  | 98  | 154 | 180 | 212 |
| ChAd-ChAd-28 | 78                         | 76  | 0   | 73  | 0   | 34  |
| ChAd-BNT-28  | 82                         | 82  | 0   | 79  | 0   | 36  |
| BNT-BNT-28   | 82                         | 82  | 0   | 79  | 0   | 29  |
| BNT-ChAd-28  | 82                         | 81  | 0   | 80  | 0   | 32  |
| ChAd-ChAd-84 | 89                         | 88  | 85  | 0   | 61  | 0   |
| ChAd-BNT-84  | 77                         | 75  | 76  | 0   | 57  | 0   |
| BNT-BNT-84   | 87                         | 85  | 82  | 0   | 62  | 0   |
| BNT-ChAd-84  | 77                         | 76  | 74  | 0   | 54  | 0   |
| <b>Total</b> | 654                        | 645 | 317 | 311 | 234 | 131 |

175

| C<br>Arm     | Timepoint from first dose |     |     |     |     |     |     |     |
|--------------|---------------------------|-----|-----|-----|-----|-----|-----|-----|
|              | 0                         | 28  | 56  | 84  | 112 | 182 | 240 | 264 |
| ChAd-ChAd-28 | 79                        | 78  | 74  | 0   | 0   | 70  | 31  | 0   |
| ChAd-BNT-28  | 81                        | 82  | 82  | 0   | 0   | 73  | 35  | 0   |
| BNT-BNT-28   | 81                        | 82  | 82  | 0   | 0   | 76  | 29  | 0   |
| BNT-ChAd-28  | 82                        | 81  | 82  | 0   | 0   | 80  | 27  | 0   |
| ChAd-ChAd-84 | 88                        | 0   | 88  | 88  | 86  | 80  | 0   | 57  |
| ChAd-BNT-84  | 75                        | 0   | 76  | 76  | 74  | 72  | 0   | 54  |
| BNT-BNT-84   | 86                        | 0   | 86  | 87  | 81  | 82  | 0   | 56  |
| BNT-ChAd-84  | 77                        | 0   | 76  | 77  | 73  | 73  | 0   | 52  |
| <b>Total</b> | 649                       | 323 | 646 | 328 | 314 | 606 | 122 | 219 |

176

| D<br>Arm     | Timepoint from second dose |     |     |     |     |     |
|--------------|----------------------------|-----|-----|-----|-----|-----|
|              | 0                          | 28  | 98  | 154 | 180 | 212 |
| ChAd-ChAd-28 | 78                         | 74  | 0   | 70  | 0   | 31  |
| ChAd-BNT-28  | 82                         | 82  | 0   | 73  | 0   | 35  |
| BNT-BNT-28   | 82                         | 82  | 0   | 76  | 0   | 29  |
| BNT-ChAd-28  | 81                         | 82  | 0   | 80  | 0   | 27  |
| ChAd-ChAd-84 | 88                         | 86  | 80  | 0   | 57  | 0   |
| ChAd-BNT-84  | 76                         | 74  | 72  | 0   | 54  | 0   |
| BNT-BNT-84   | 87                         | 81  | 82  | 0   | 56  | 0   |
| BNT-ChAd-84  | 77                         | 73  | 73  | 0   | 52  | 0   |
| <b>Total</b> | 651                        | 634 | 307 | 299 | 219 | 122 |

177

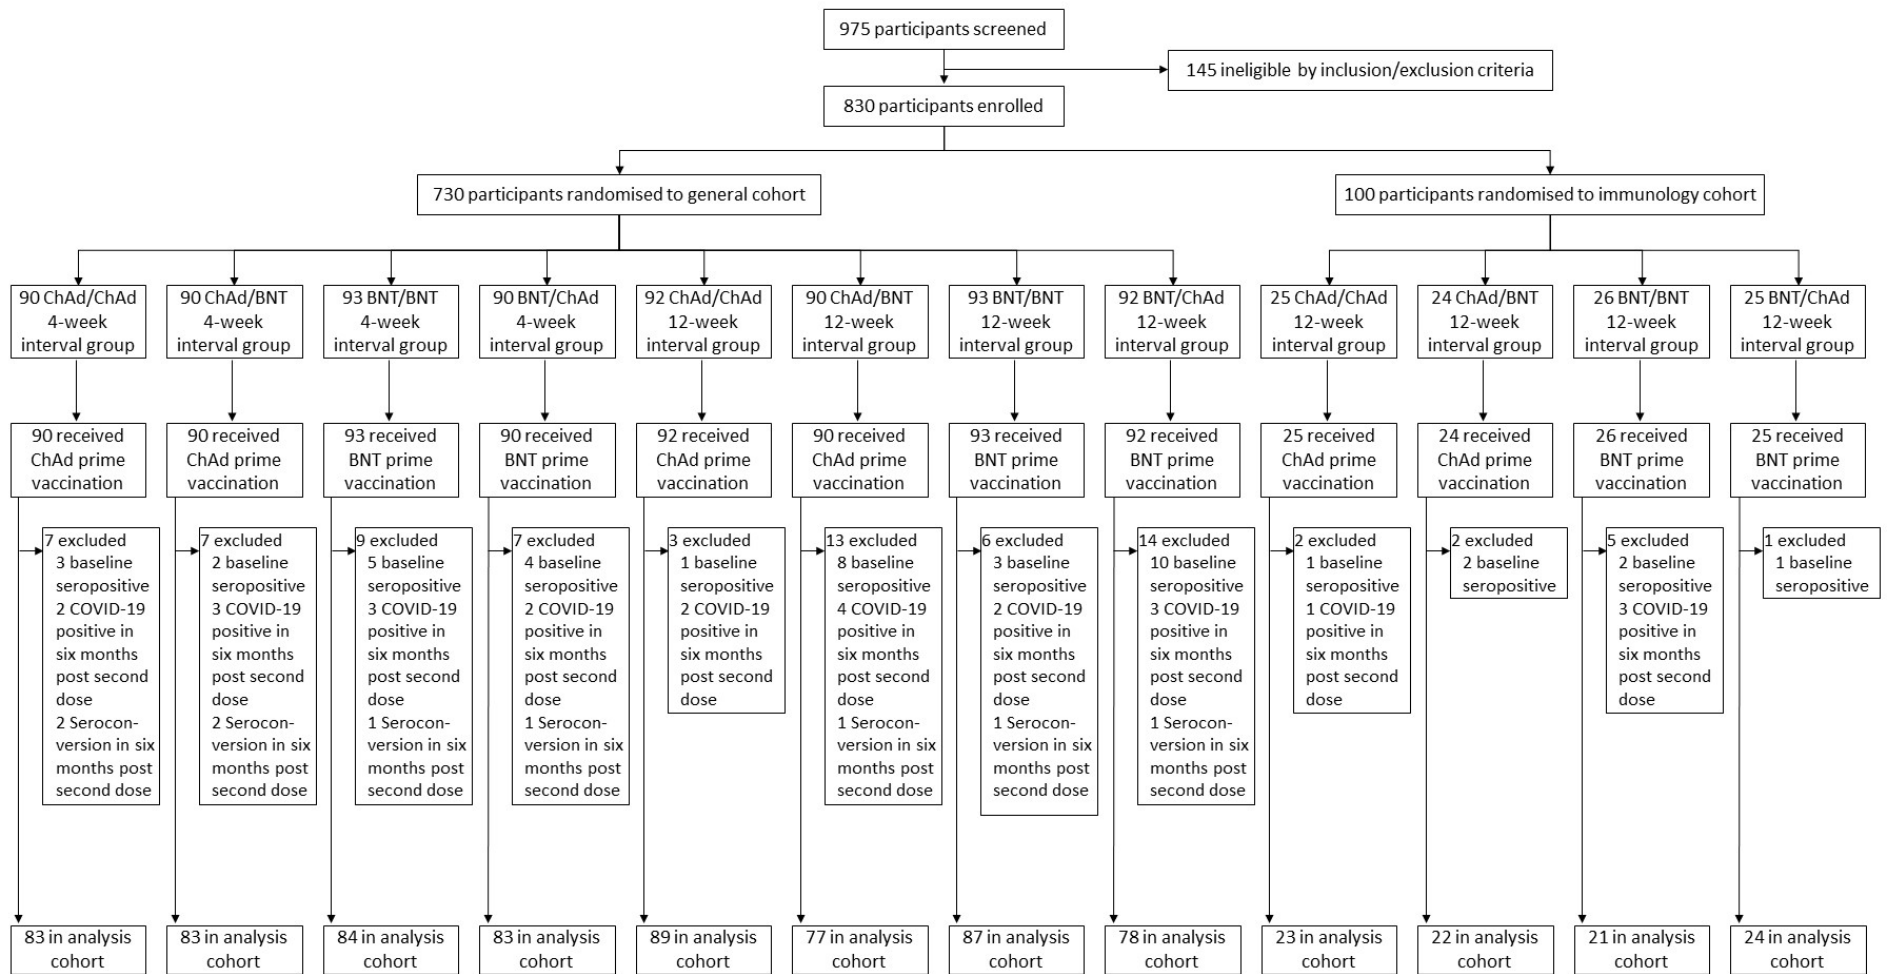

180 **Supplementary Figure 2. Kinetics of immune response over time with all schedules normalised by time of first**  
 181 **dose in the seronegative general cohort A) Anti-spike IgG titre, B) T-cell ELISpot count**  
 182

183 D0 refers to time of first dose; Data points are geometric mean concentrations, with whiskers showing 95%  
 184 confidence intervals; Dotted lines are interpolations between Day 28 and Day 56 for the 12-week interval arms  
 185 only to give a more accurate view of the kinetics, as no Day 28 sample was taken in 12-week interval arms and  
 186 the Day 28 data in the 4-week interval arms were used to draw dotted lines.  
 187

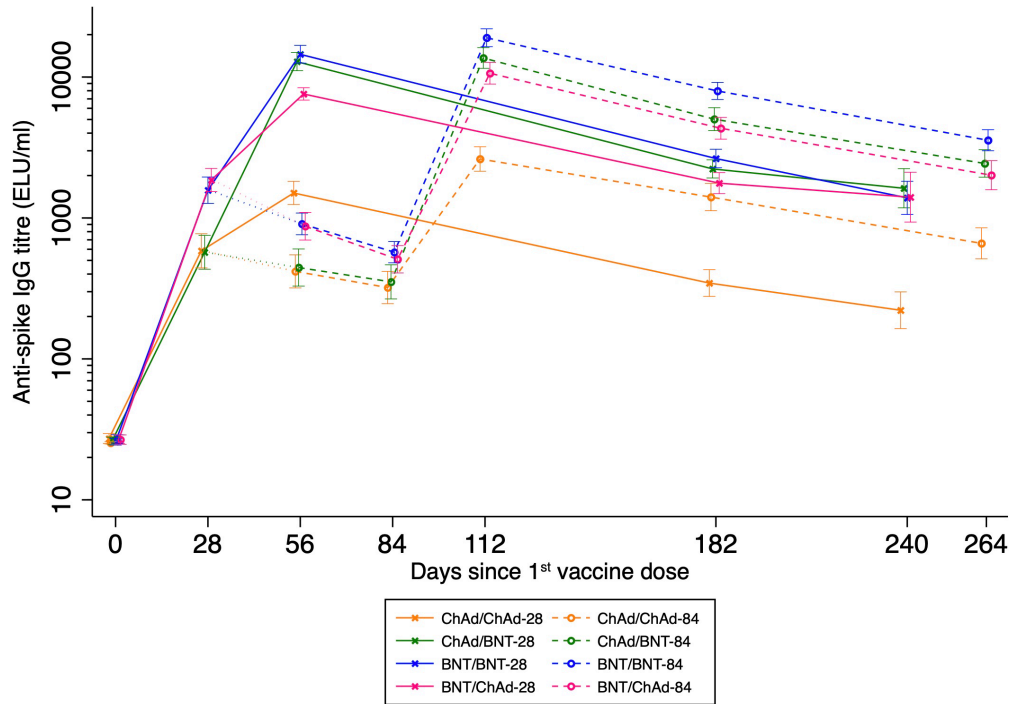

188 **A)**

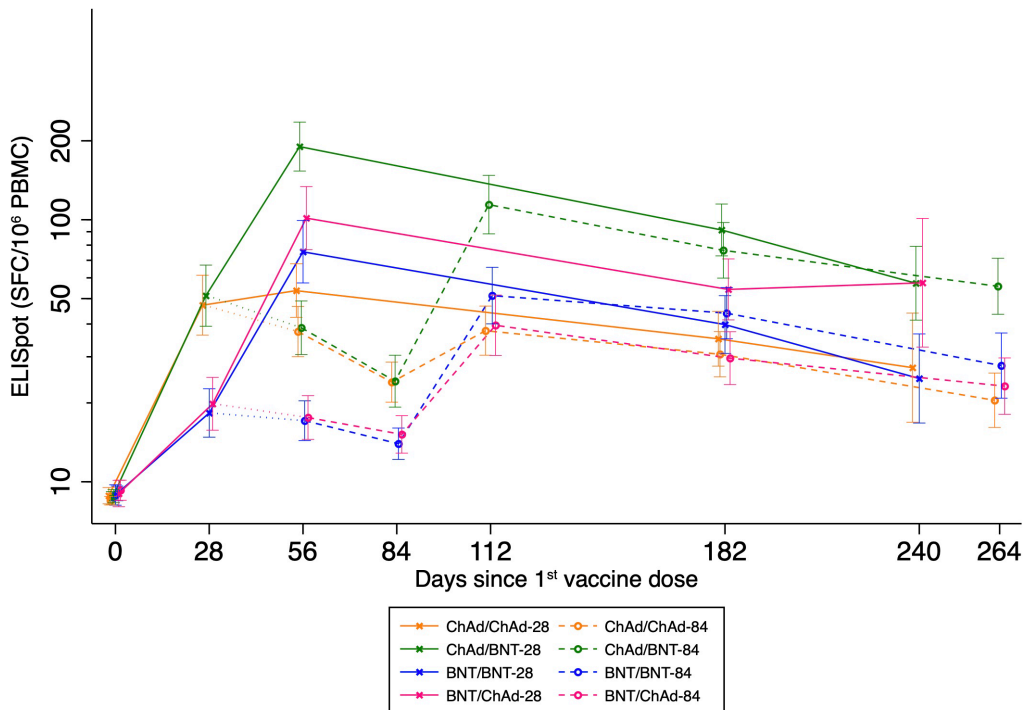

189 **B)**

190  
 191  
 192  
 193

194 **Supplementary Figure 3. Sensitivity analyses for immune responses comparing 4-week and 12-week interval**  
 195 **in the general and immunology cohorts**  
 196

197 Data presented are the geometric means and 95% confidence interval; Fold changes were calculated by dividing  
 198 the immune response at 6-months post-second dose by that at 28-day post-second dose; Geometric mean ratios  
 199 (GMRs) between schedules with 4- and 12-week intervals were adjusted for study site and paracetamol usage in  
 200 the first 24 hours post vaccination (yes/no) for the 28-day data; 6-month visit time (days) was further adjusted for  
 201 the 6-month data and fold change. The dotted line refers to a GMR of one, where there is no difference between  
 202 4- and 12-week interval arms.  
 203

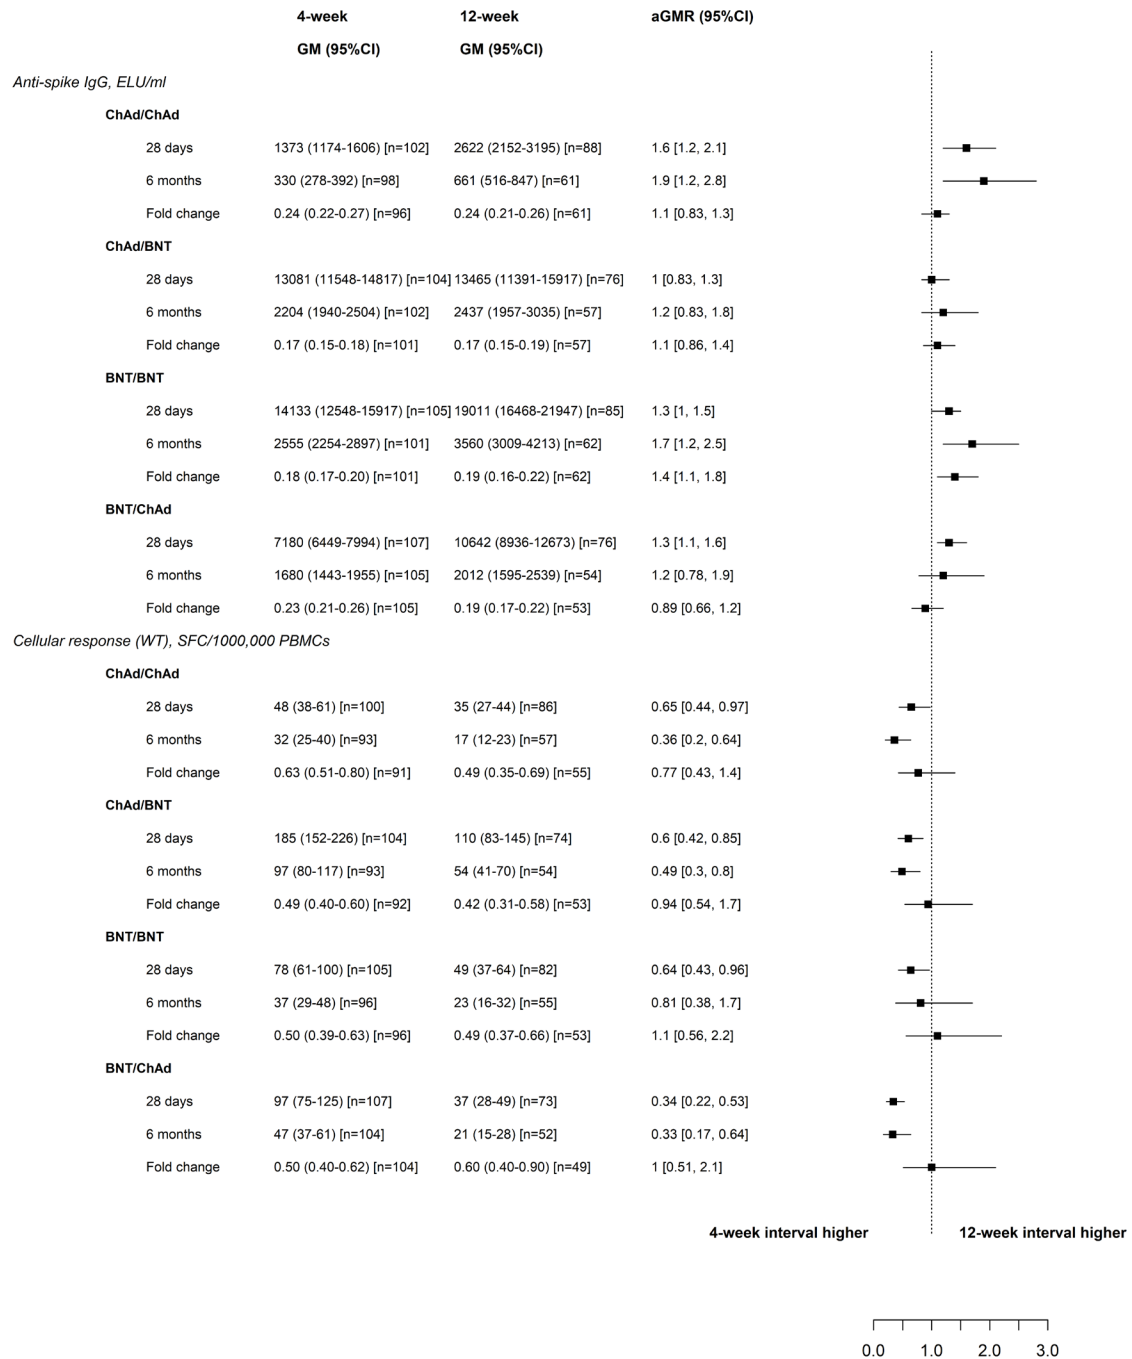

204  
 205  
 206  
 207  
 208  
 209



210 **Supplementary Figure 4. Subgroup analyses for immune responses comparing 4-week and 12-week intervals**  
 211 **among schedules of A) ChAd/ChAd; B) ChAd/BNT; C) BNT/BNT; D) BNT/ChAd, at 28 days post second dose**  
 212 **in the general cohort**

213  
 214 Geometric mean ratios (GMRs) were adjusted for study site and paracetamol use on day 0 or day 1 post-  
 215 vaccination; two-sided 95% CI are presented. The vertical dotted line represents a GMR of one. Comorbidity  
 216 was defined as presence of any cardiovascular/respiratory disease or diabetes  
 217  
 218

**A)**

**ChAd/ChAd**

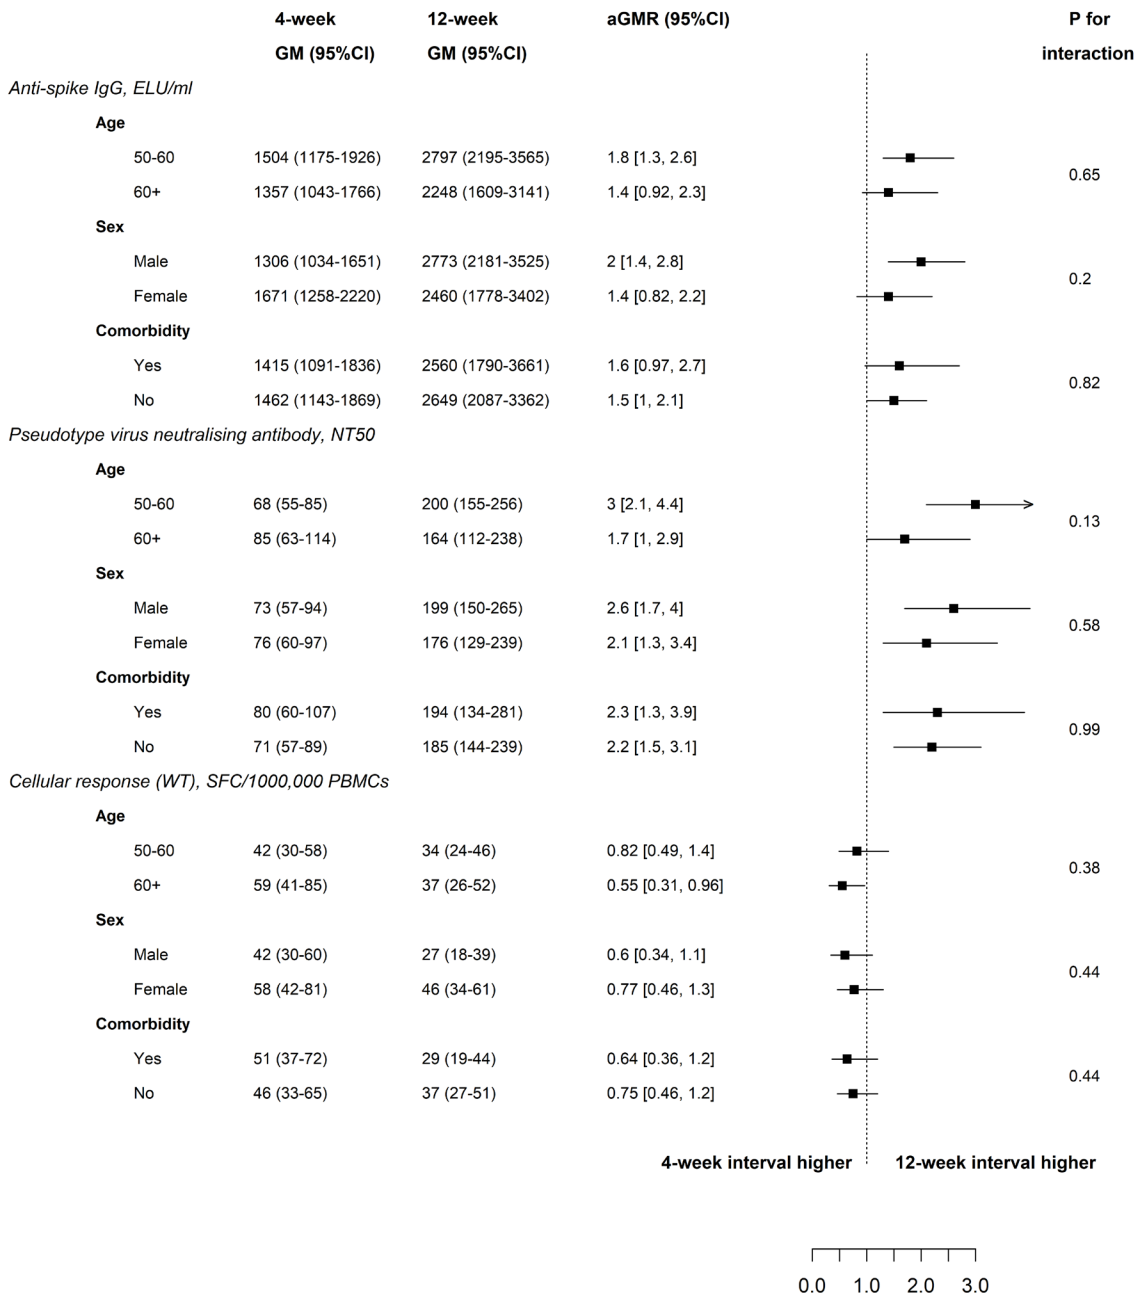

**ChAd/BNT**

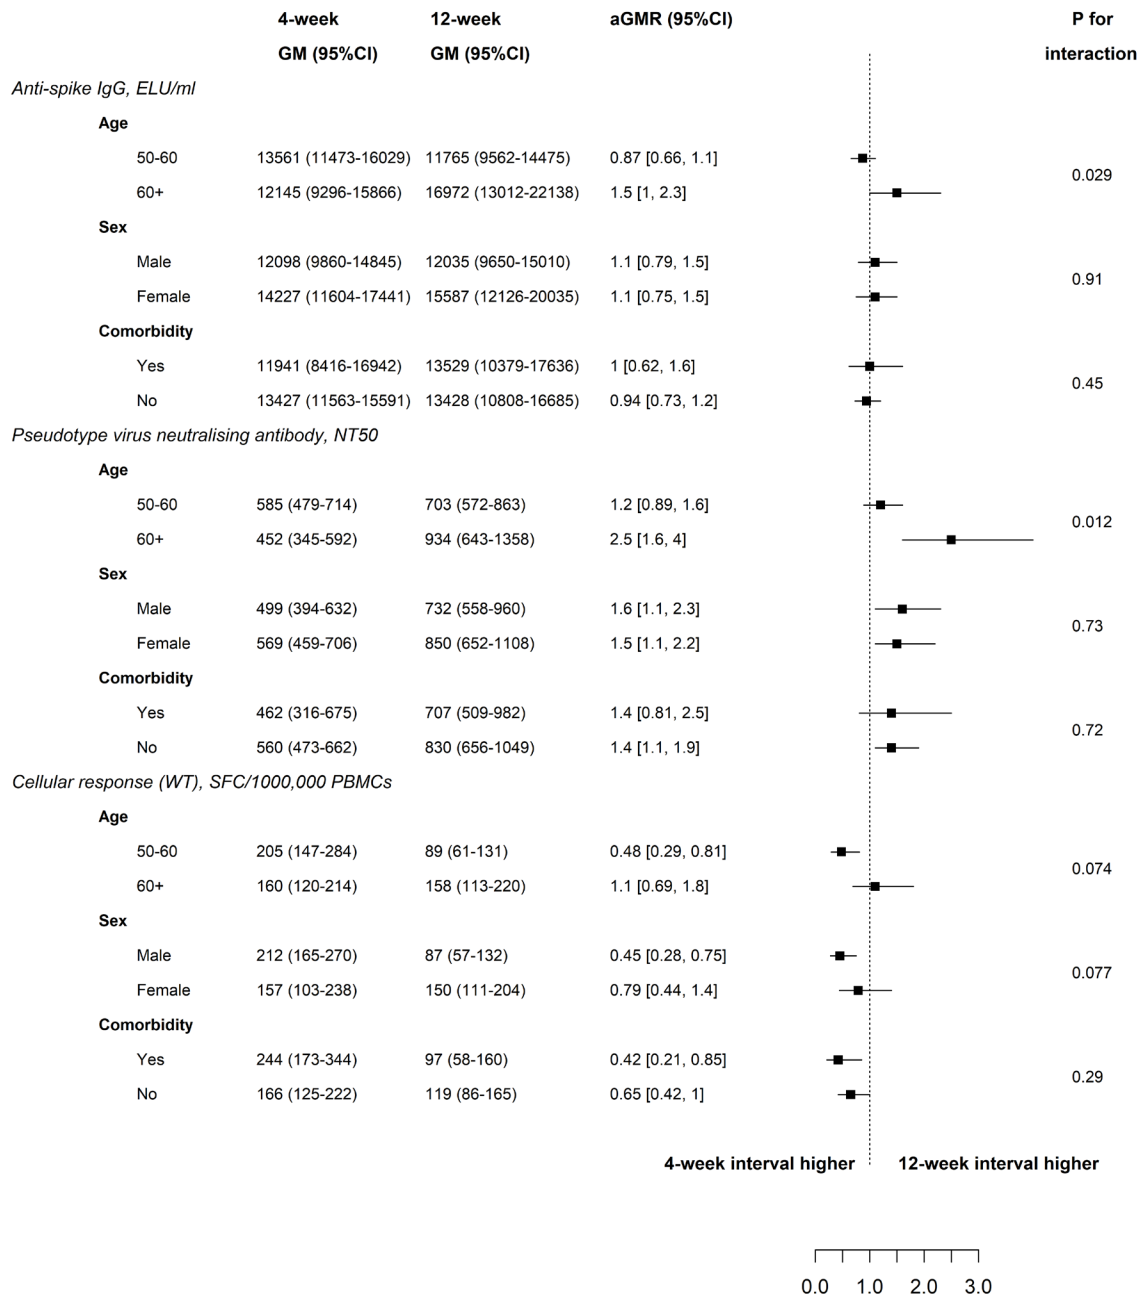

**BNT/BNT**

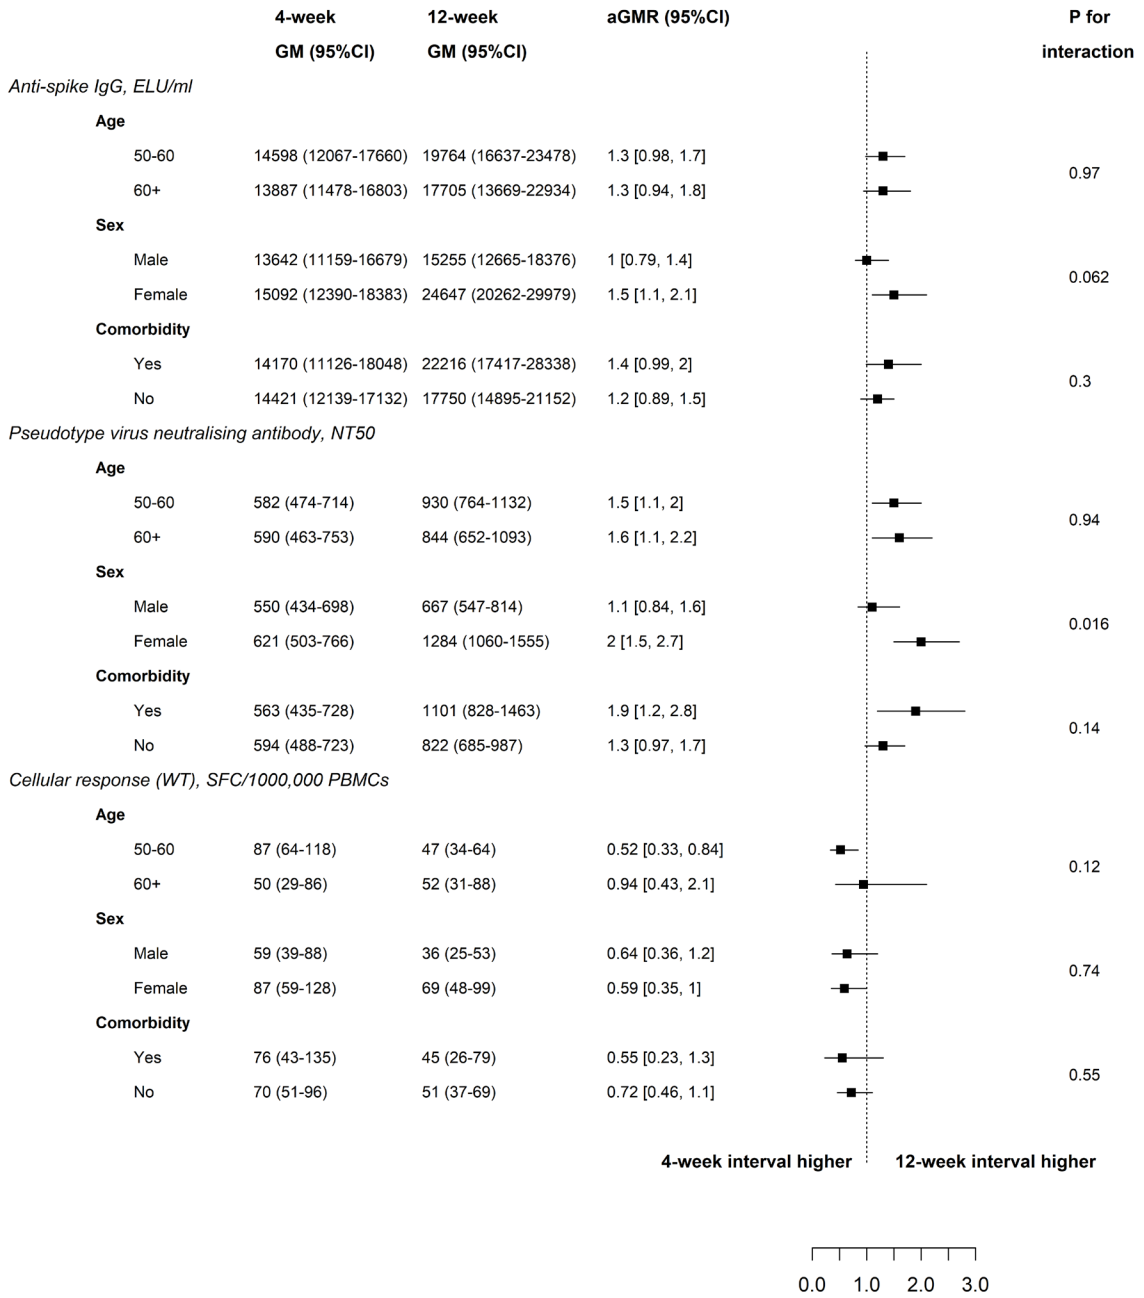

**BNT/ChAd**

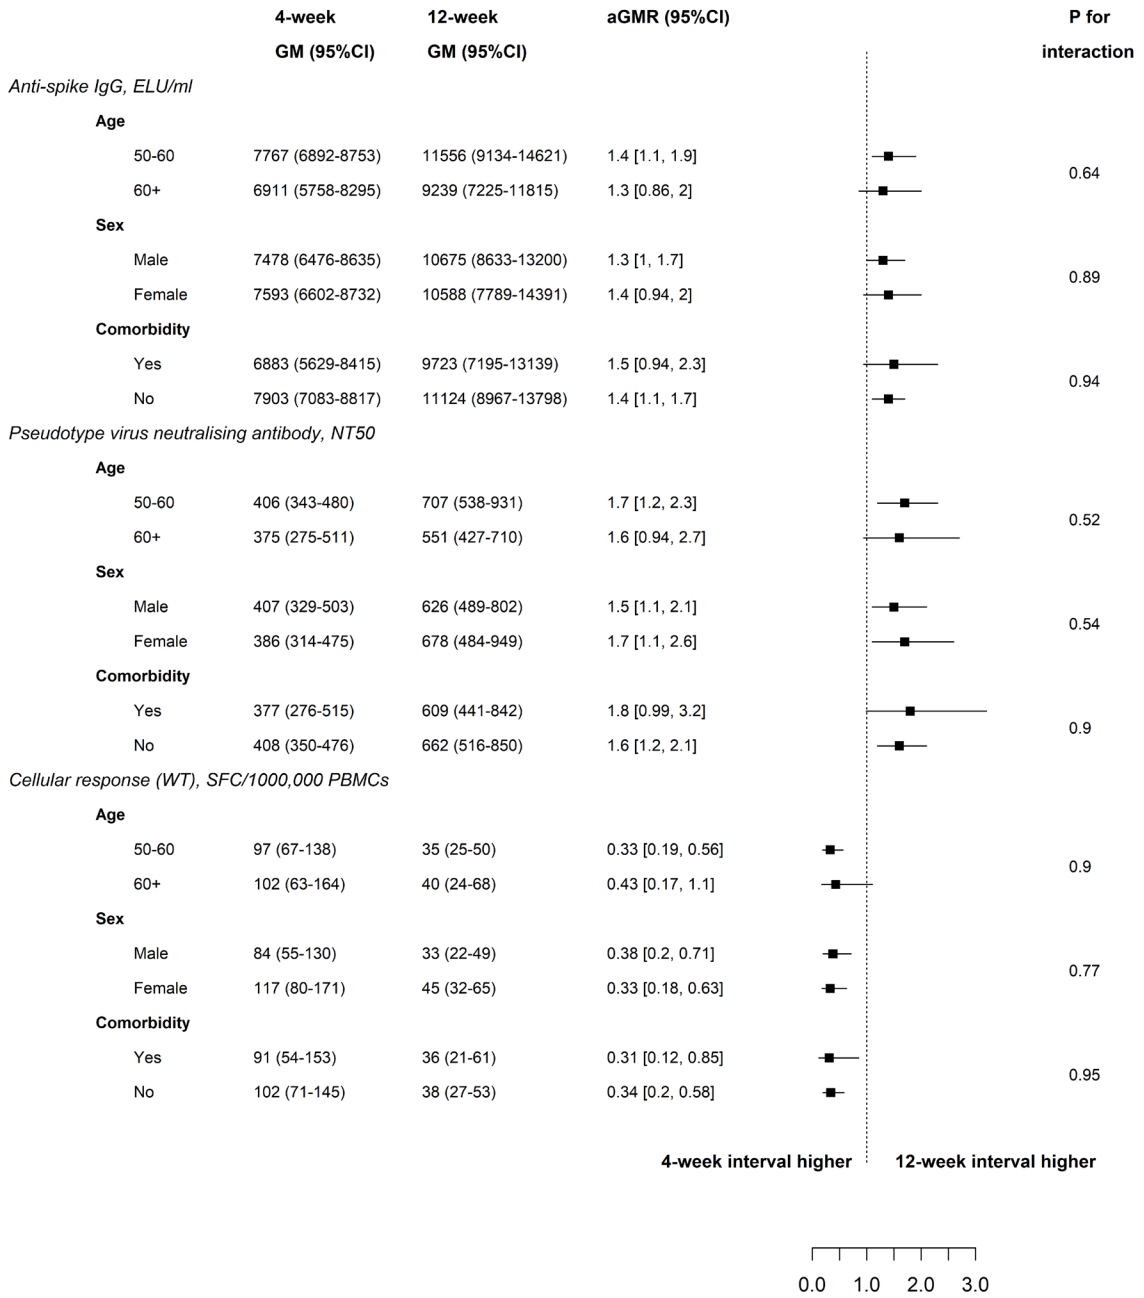

227 **Supplementary Figure 5. Live neutralising antibodies against Victoria, Beta, Delta and Omicron variants at 28 days and 3 months post second dose in the general cohort**  
228 **with a 12-week interval**  
229

230 Dotted lines are the half value of the lower limit of detection; Boxes show median (IQR). 28-day post second-dose data not available for the Omicron variant. The same 50  
231 participants were analysed at each timepoint for each variant.  
232

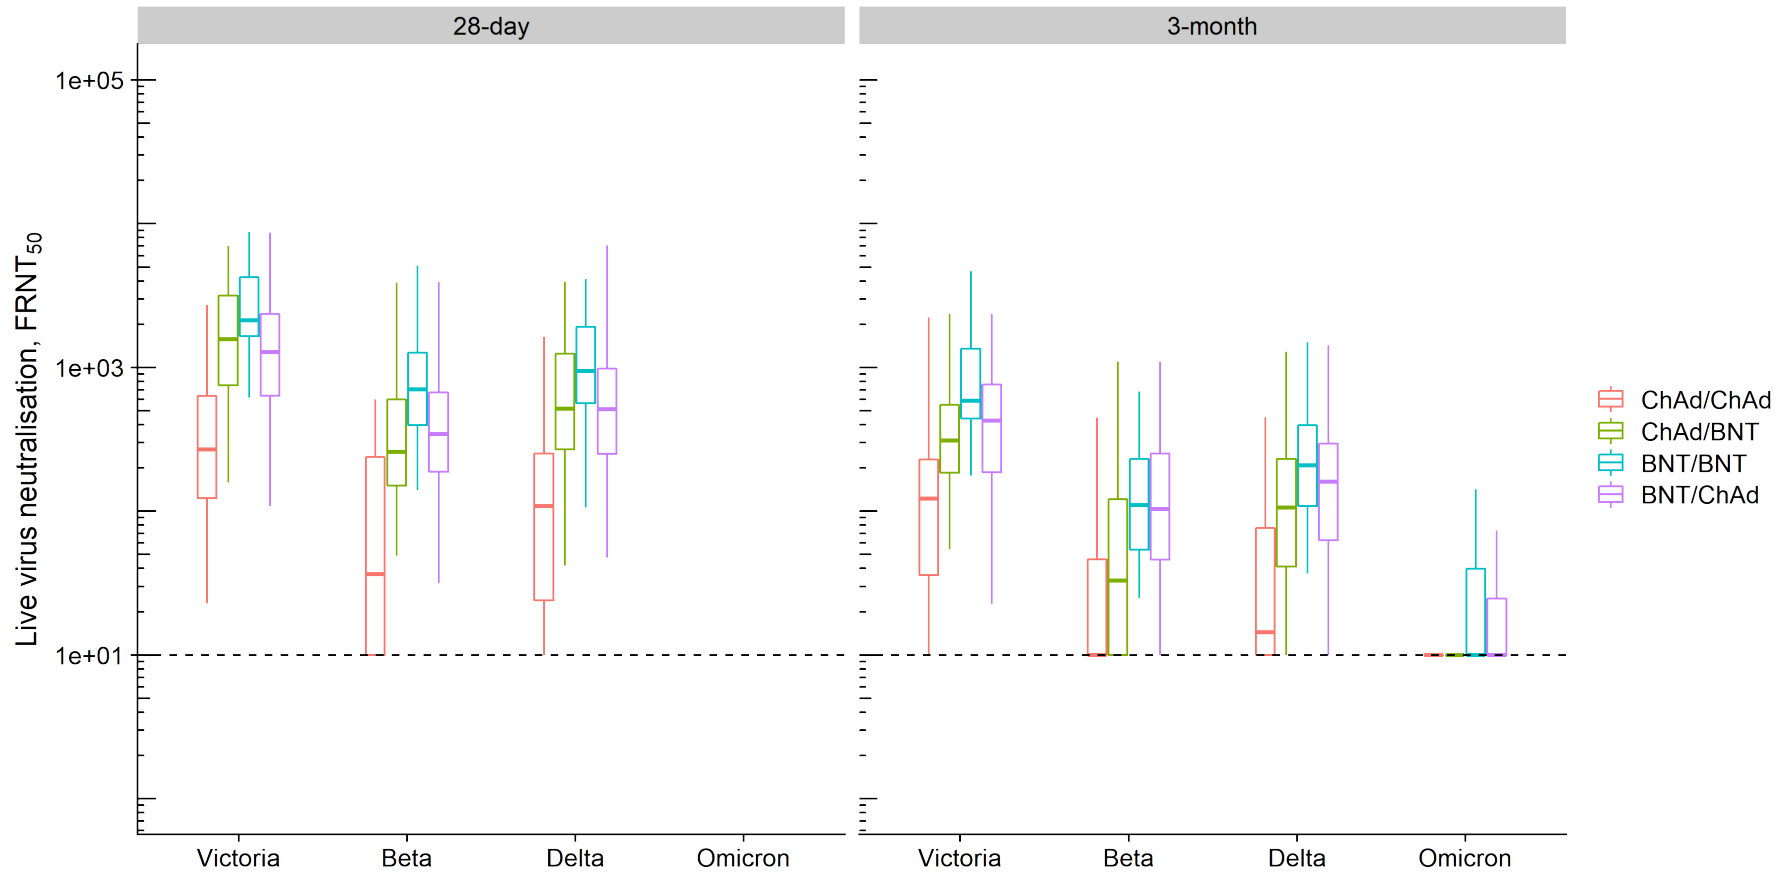

233

234 **Supplementary Figure 6. Correlation between A) WT & Beta VNA, B) WT & Delta VNA, C) WT & Beta**  
 235 **Cellular response, and D) WT & Delta Cellular response at 28 days post boost in the 12-week interval arms**  
 236

237 *The dotted diagonal line shows the situation when the immunogenicity against a variant of concern (VOC) is the*  
 238 *same as that against the WT; the solid lines are the fitted linear regression based on the data above the LLOQ in*  
 239 *each schedule. When the fitted line is below the dotted line, the immunogenicity against the VOC is less than that*  
 240 *against WT, i.e. the cross-protection ratio is less than one. The closer the cross-protection ratio is to one, the*  
 241 *closer the solid fitted line to the dotted diagonal line. When the fitted line is parallel to the dotted diagonal line,*  
 242 *the cross-protection ratio does not change with the absolute level of immunogenicity. FRNT<sub>50</sub> – 50% Focal*  
 243 *reduction neutralisation titre; SFC, spot forming cells; PBMC, peripheral blood mononuclear cell; WT, wild-type*  
 244

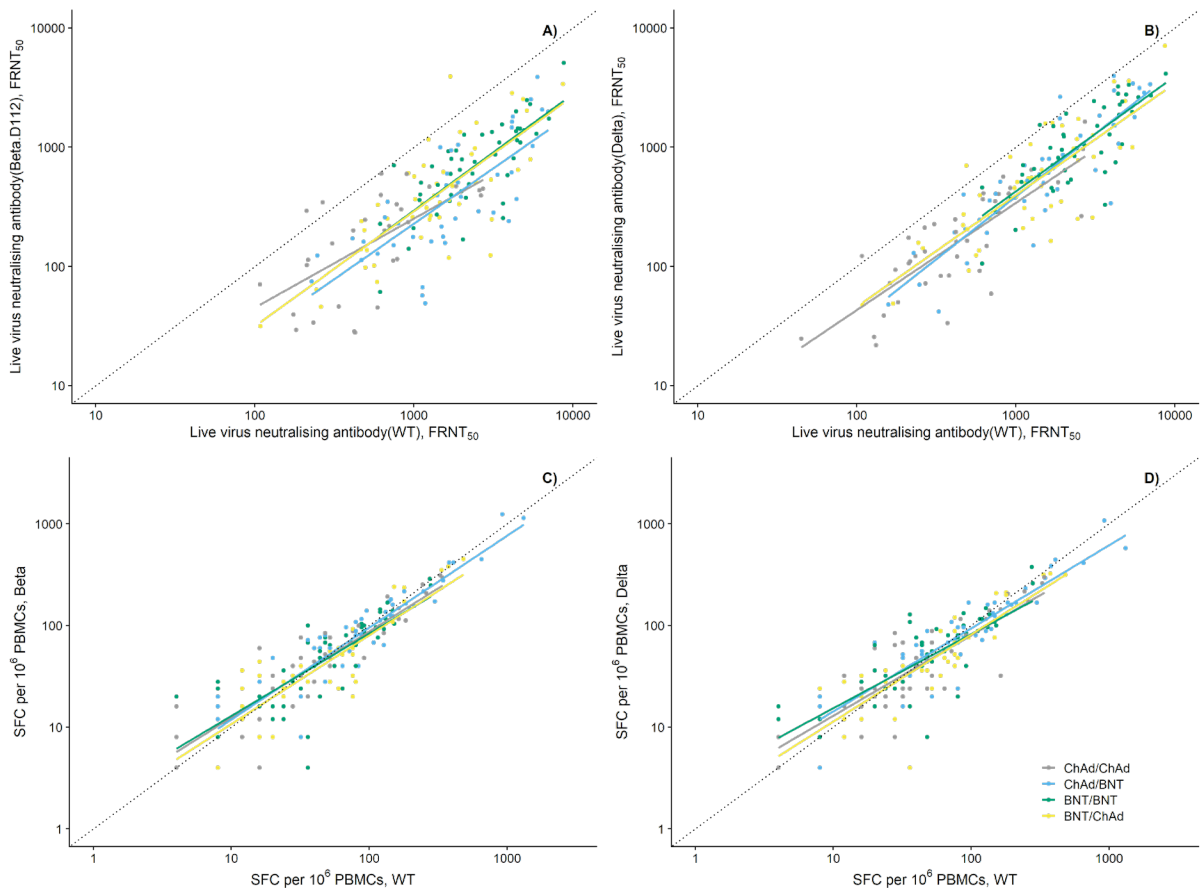

245

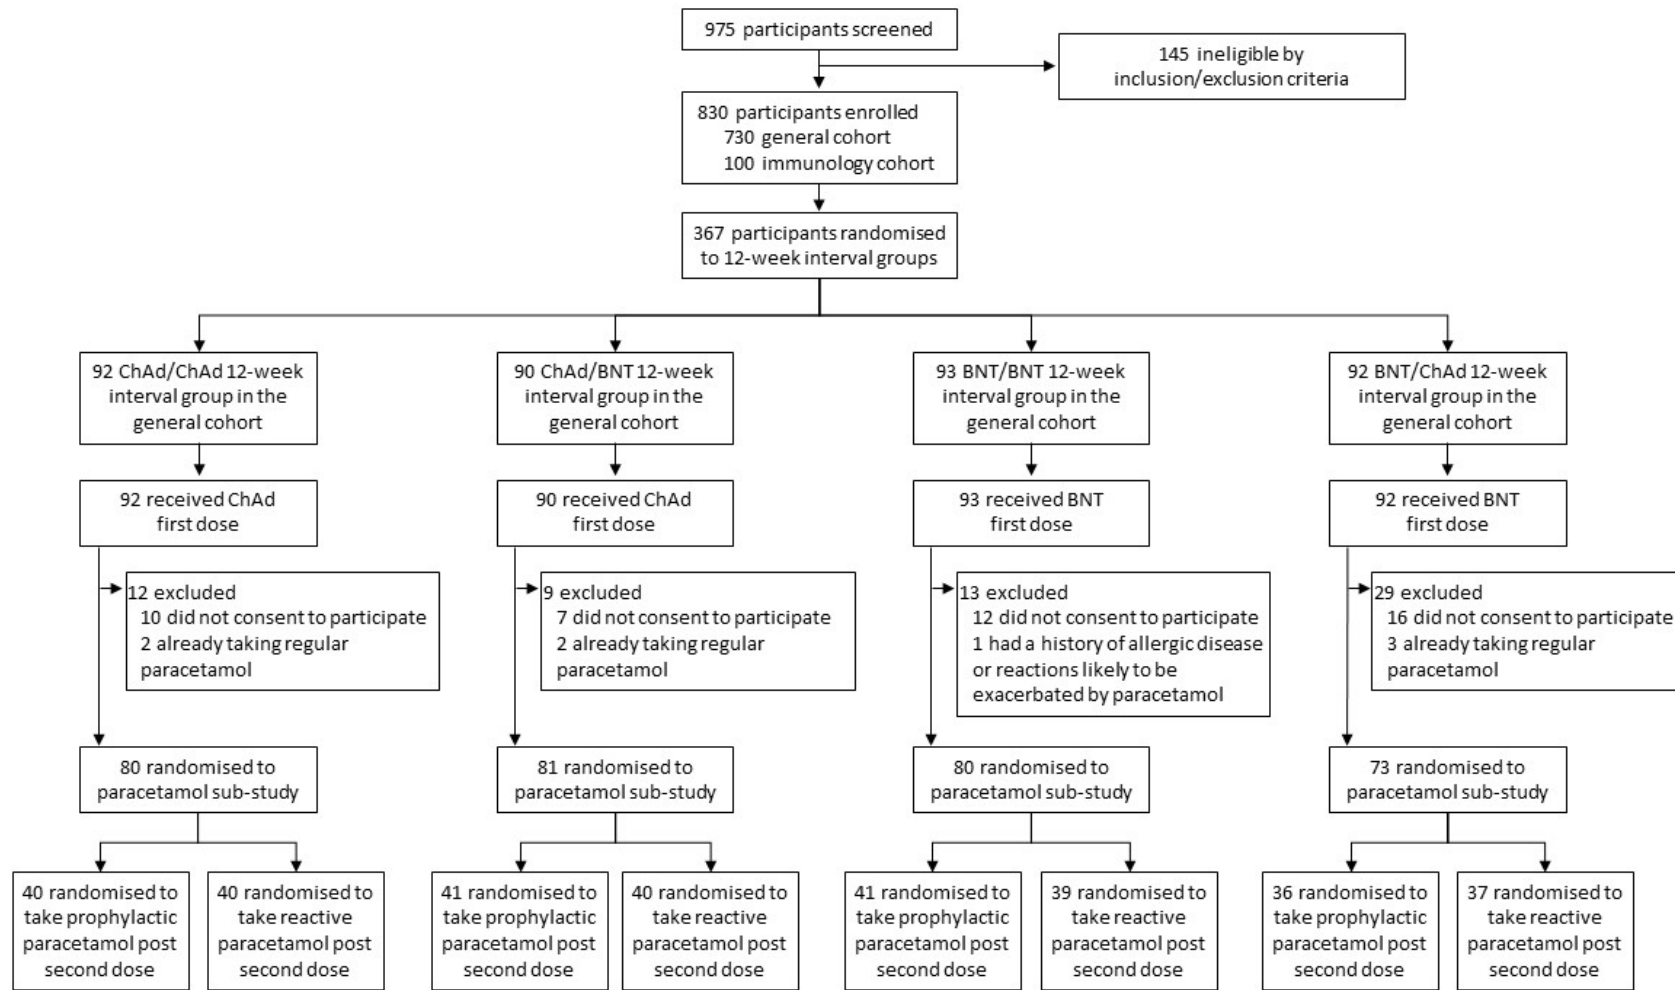

248 **Supplementary Figure 8. Maximum severity of solicited adverse events in the first seven days post- first dose**  
 249 **and post-second dose by study arm in the general cohort. A) Local, and B) Systemic**

250  
 251  
 252

**A) Local adverse events**

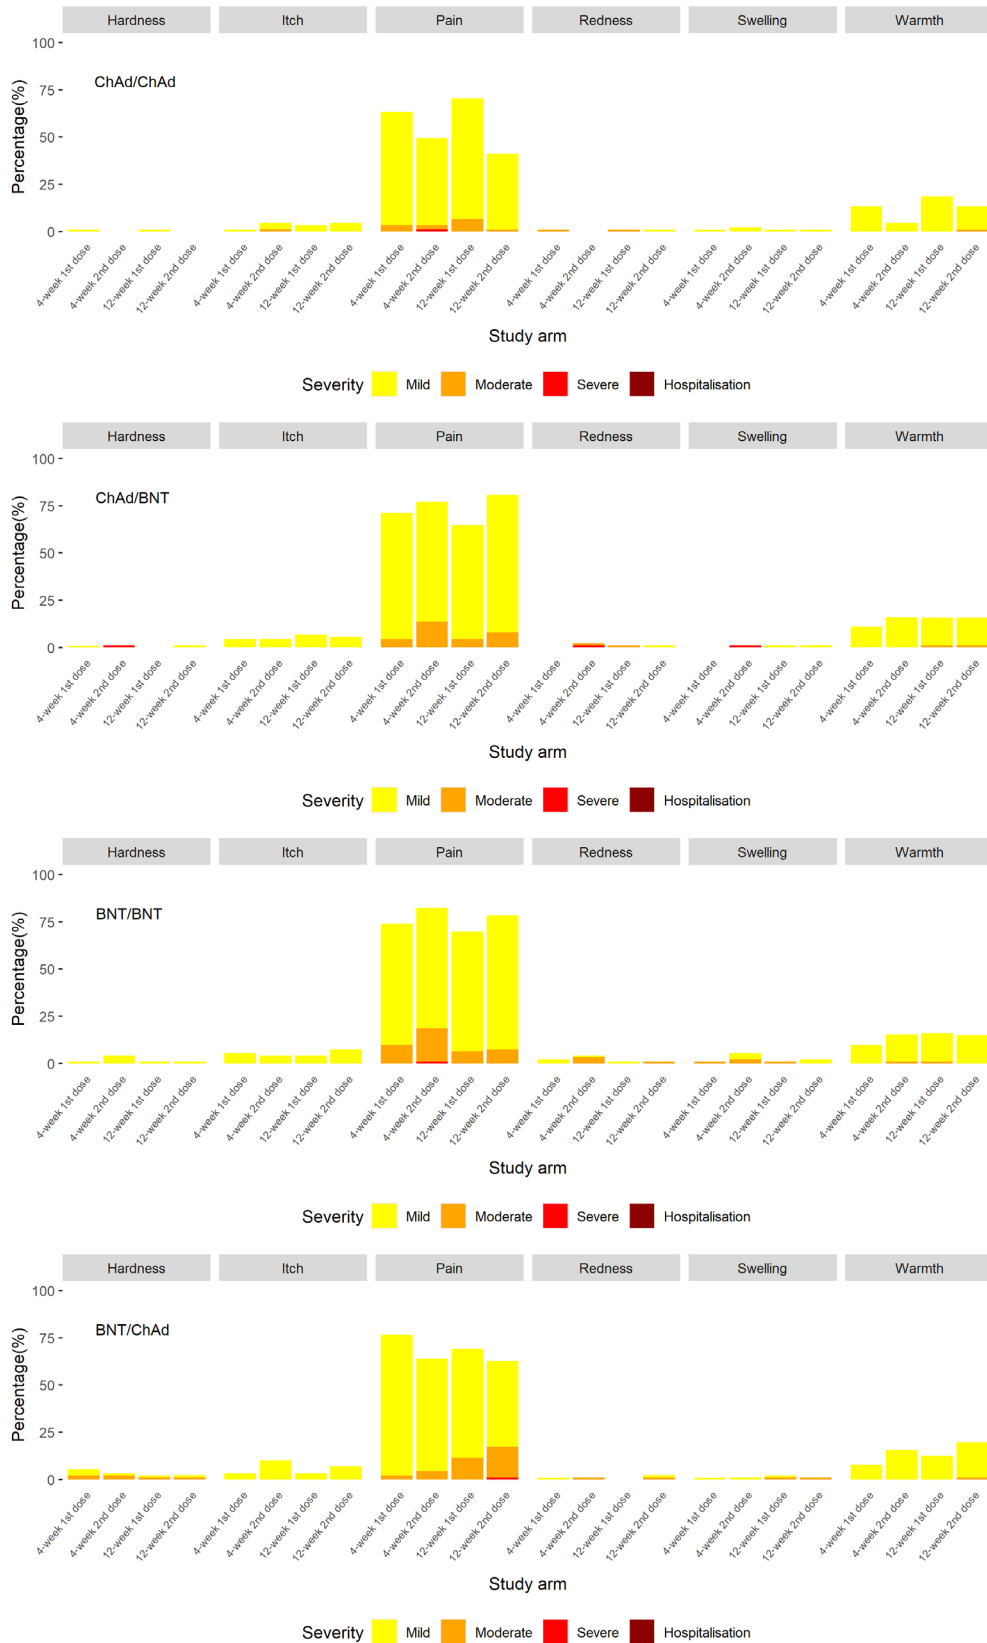

253  
 254



B) Systemic adverse events

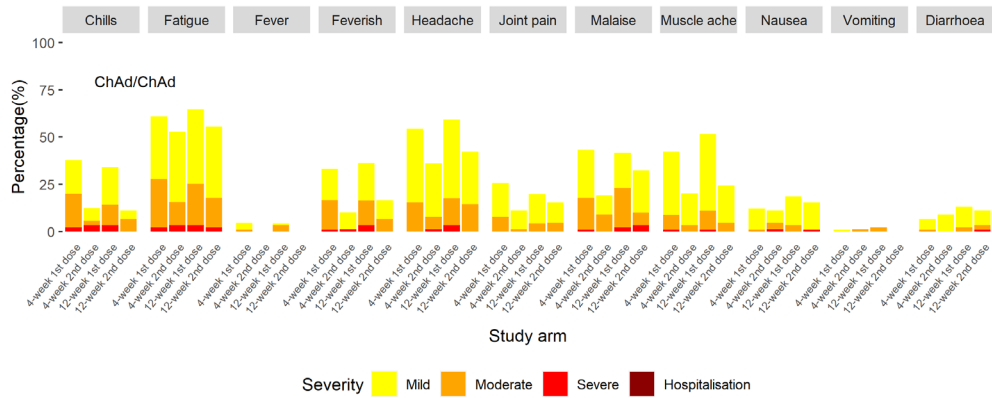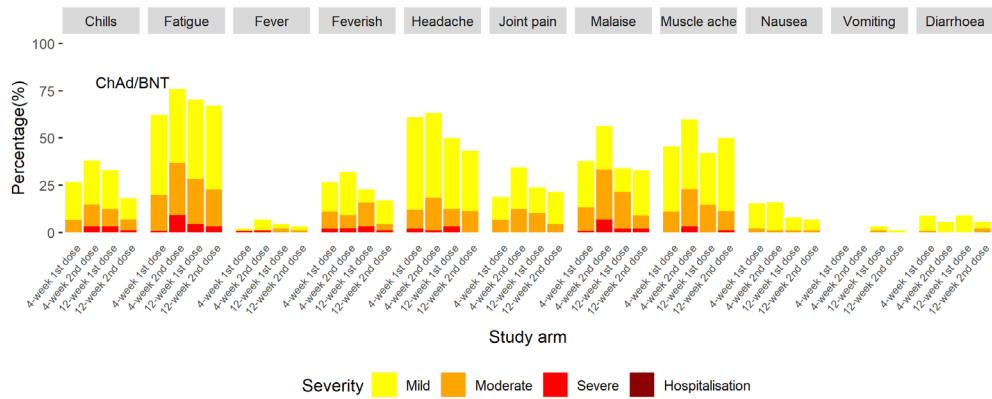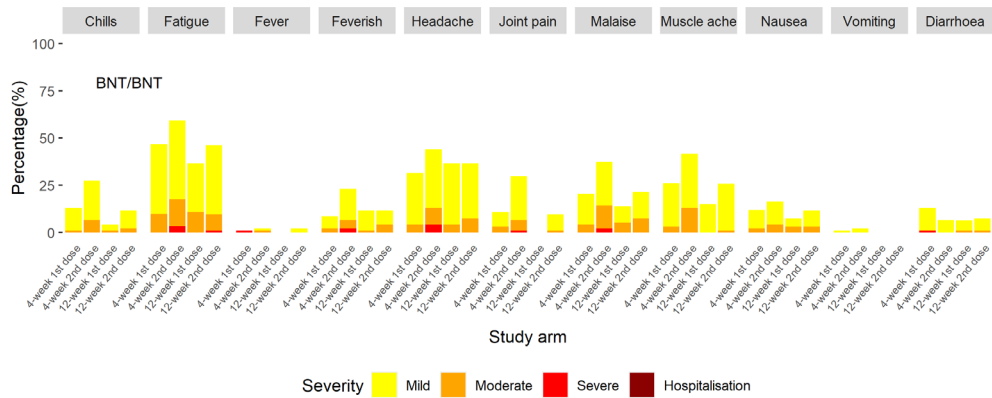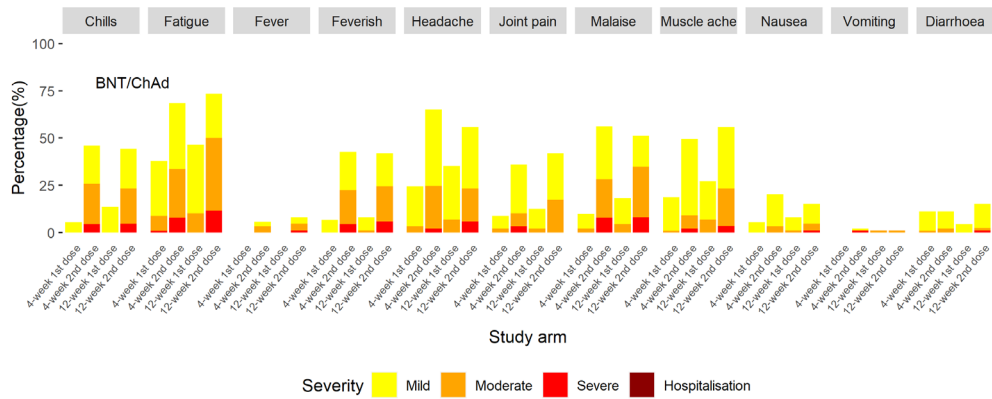

259 **Supplementary Figure 9. Forest plot of any solicited adverse events in days 0-7 post-second dose comparing heterologous to homologous schedules in the general cohort.**  
 260 **A) 4-week interval, and B) 12-week interval**

261  
 262 AE: adverse event; CI: confidence interval; OR: odds ratio. Models adjusted for paracetamol use in the first 24 hours post-second dose (yes/no) and paracetamol sub-study  
 263 randomisation (prophylactic/reactive/non-randomised) in the 12-week interval models. Models with no adjusted odds ratio were non-estimable due to no events in that study  
 264 arm. The dotted line shows the line of no difference between heterologous and homologous schedules.  
 265

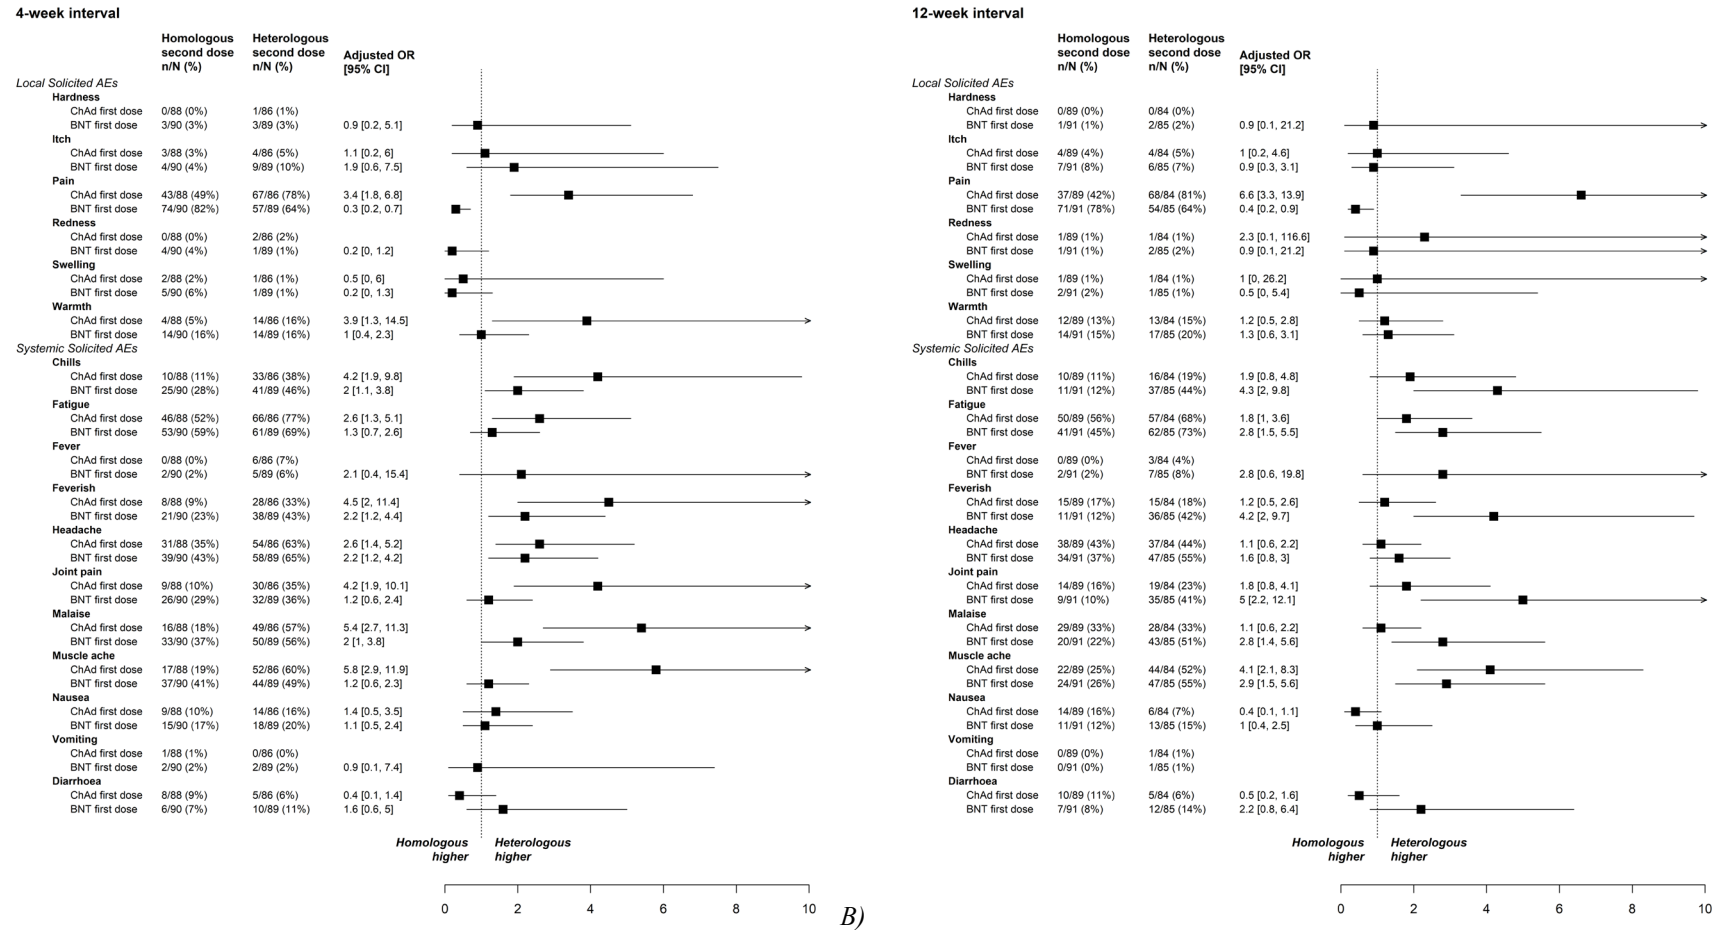

266 A)  
 267

268 **Supplementary Figure 10. Solicited adverse events in days 0-7 post second dose by day and study arm in the**  
 269 **12-week interval groups. A) Local adverse events, and B) Systemic adverse events**

270  
 271  
 272

**A) Local adverse events**

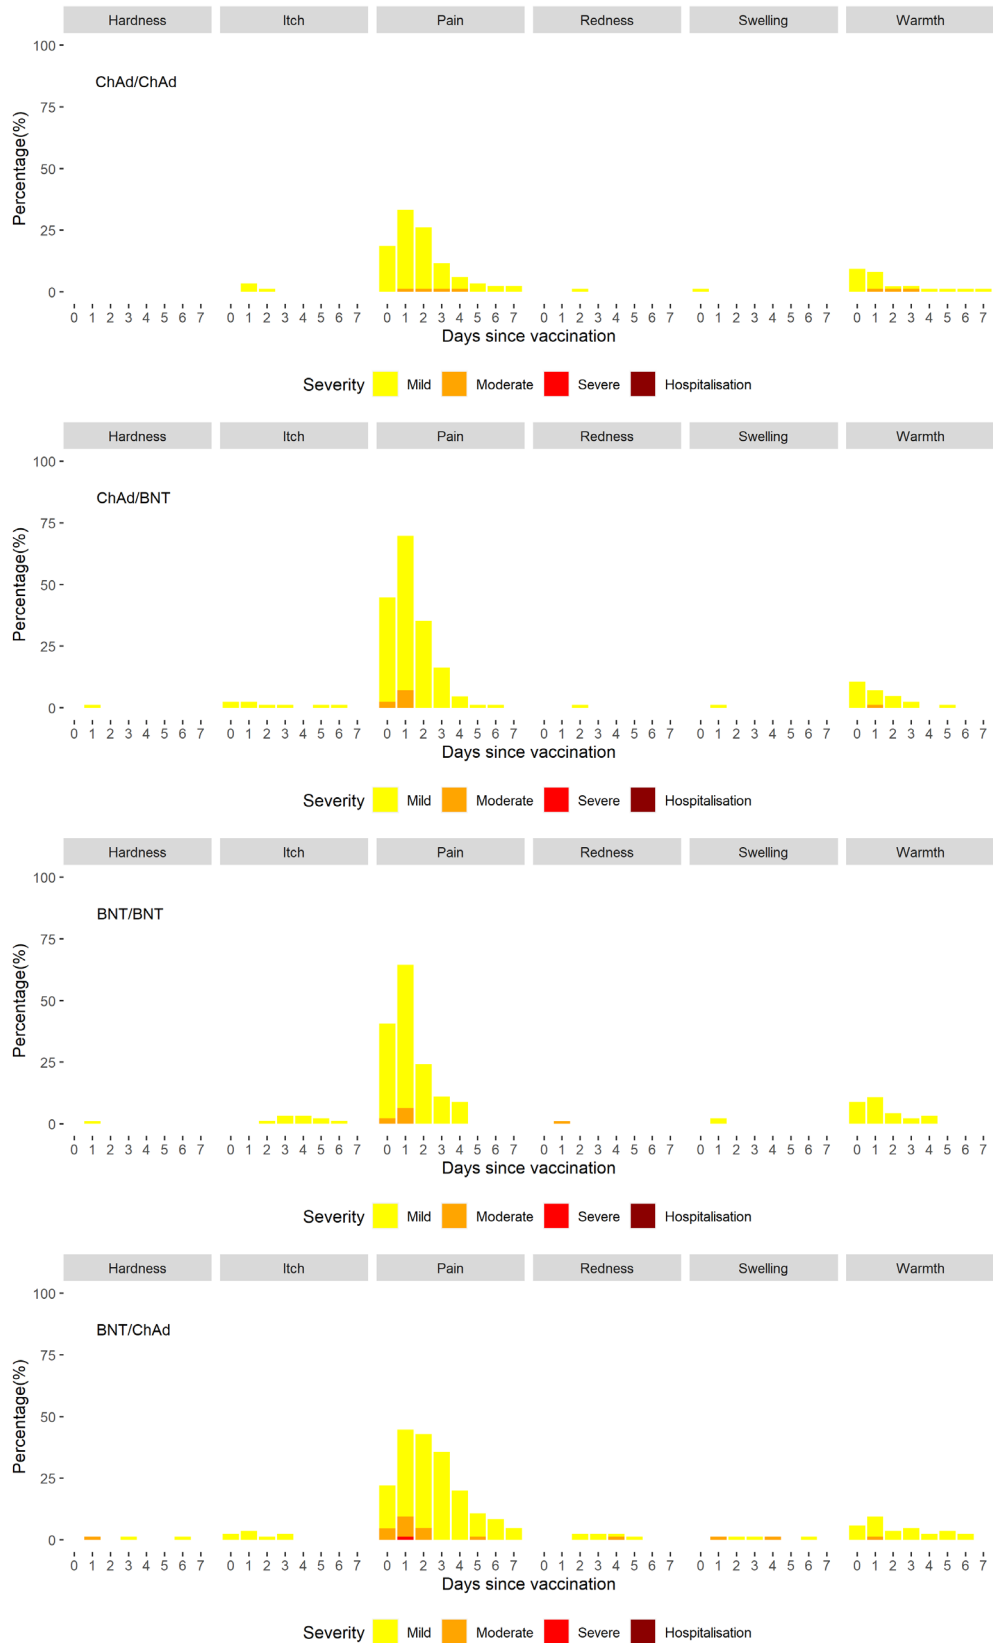

273  
 274

275  
276

**B) Systemic adverse events**

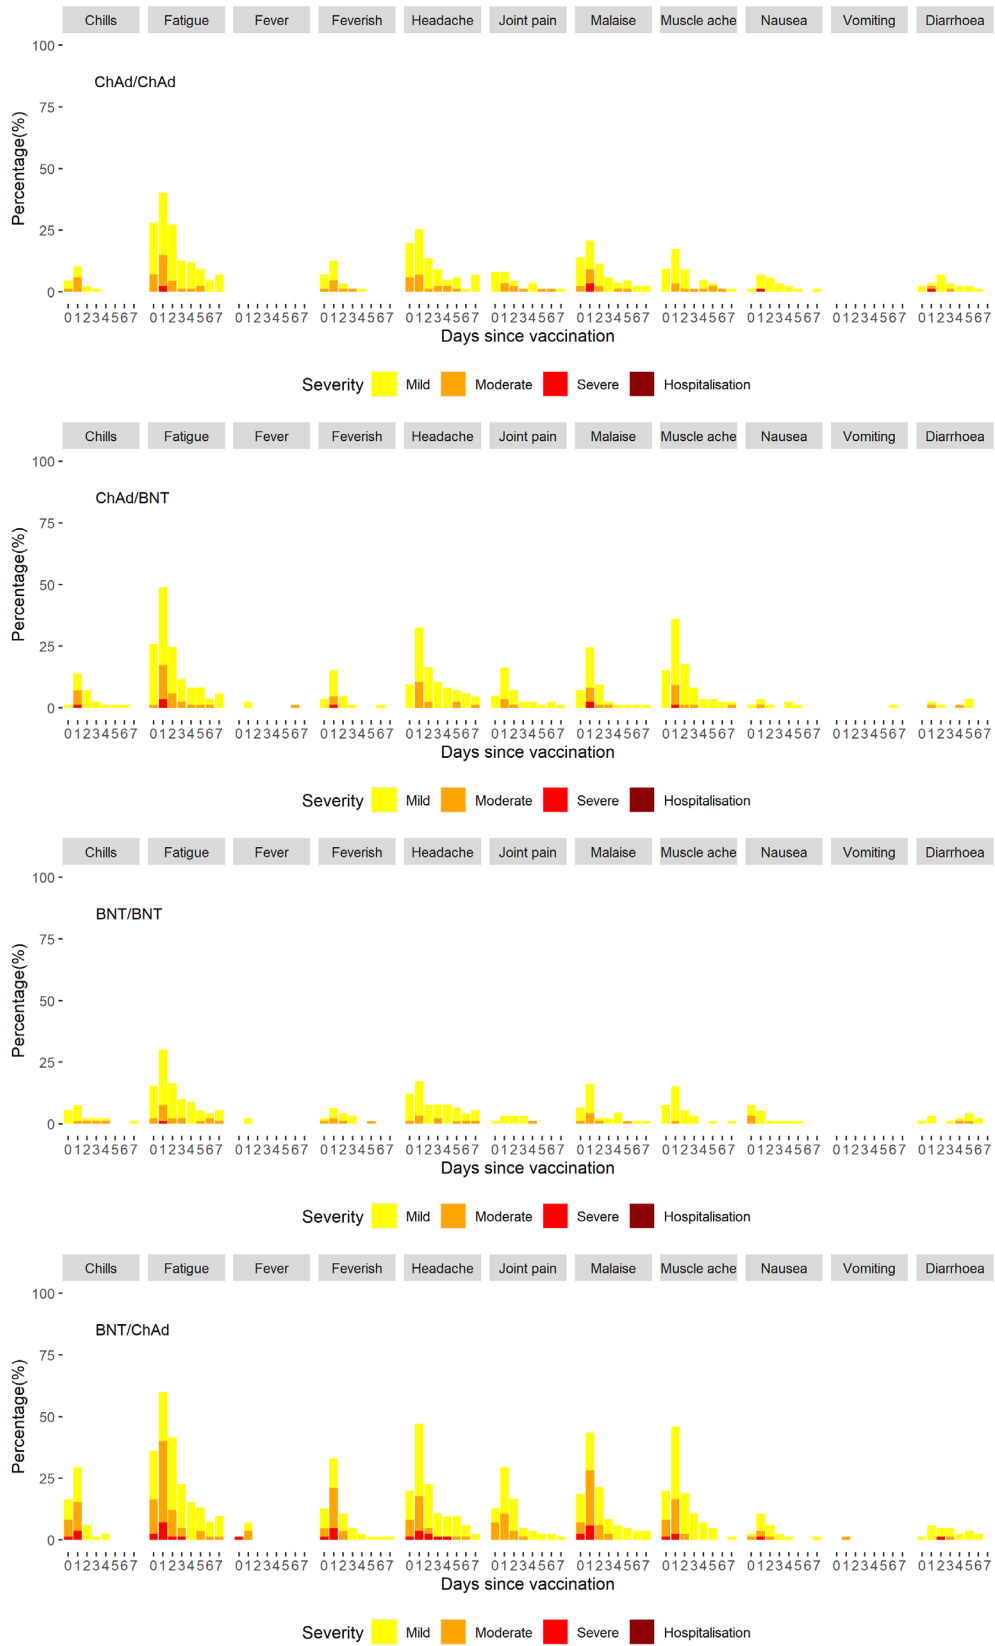

277  
278  
279  
280  
281

282 **Supplementary Figure 11. Solicited adverse events at time of second dose by paracetamol sub-study arm**  
 283 **compared to 4-week interval arms in the general cohort. A) local, B) systemic**  
 284

285  
 286  
 287  
 288

Pro: Prophylactic, Rea: Reactive, NR: Non-randomised.

**A) Local adverse events**

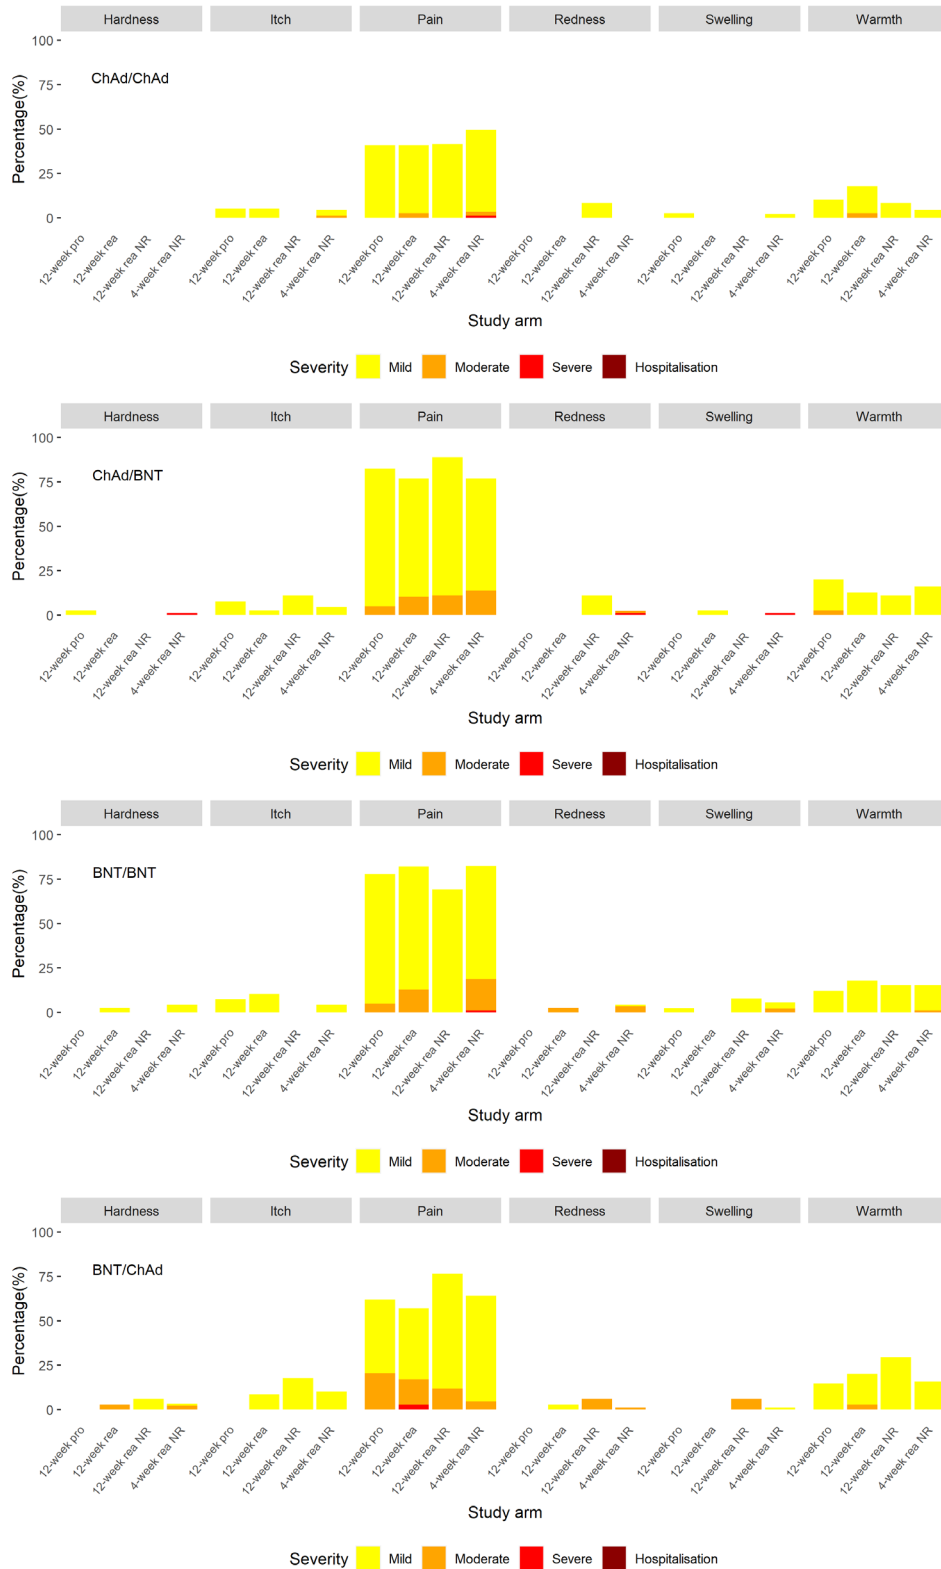

289  
 290

**B) Systemic adverse events**

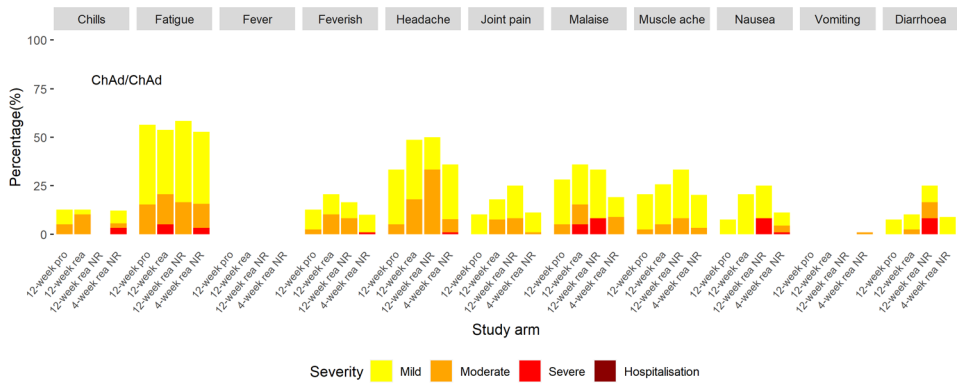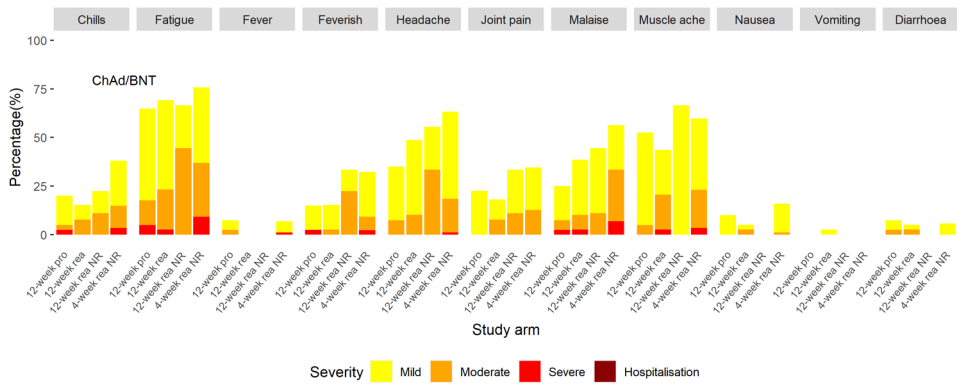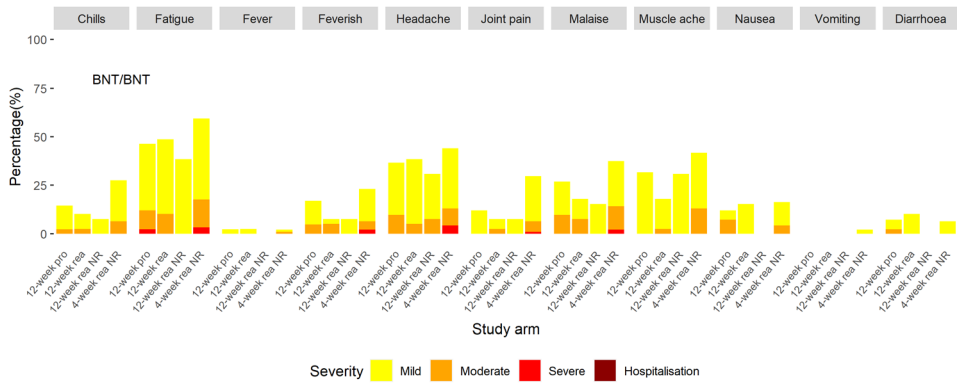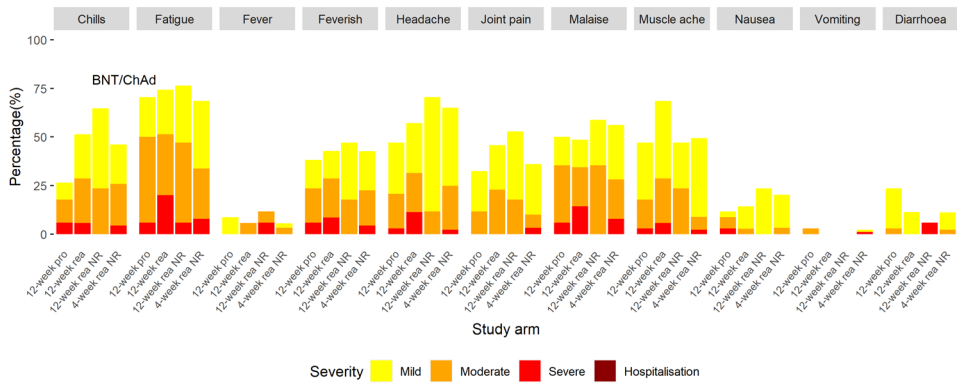

299 **Supplementary Figure 12. Forest plot of any solicited adverse events in days 0-7 post second dose comparing**  
 300 **prophylactic to reactive paracetamol use in the paracetamol sub-study of 12-interval arms for A) ChAd/ChAd;**  
 301 **B) ChAd/BNT; C) BNT/BNT; D) BNT/ChAd**

302  
 303  
 304  
 305  
 306  
 307

AE: adverse event; CI: confidence interval; OR: odds ratio.  
 Models adjusted for vaccine schedule, age and sex. The dotted line shows the line of no difference between prophylactic and reactive groups

A)

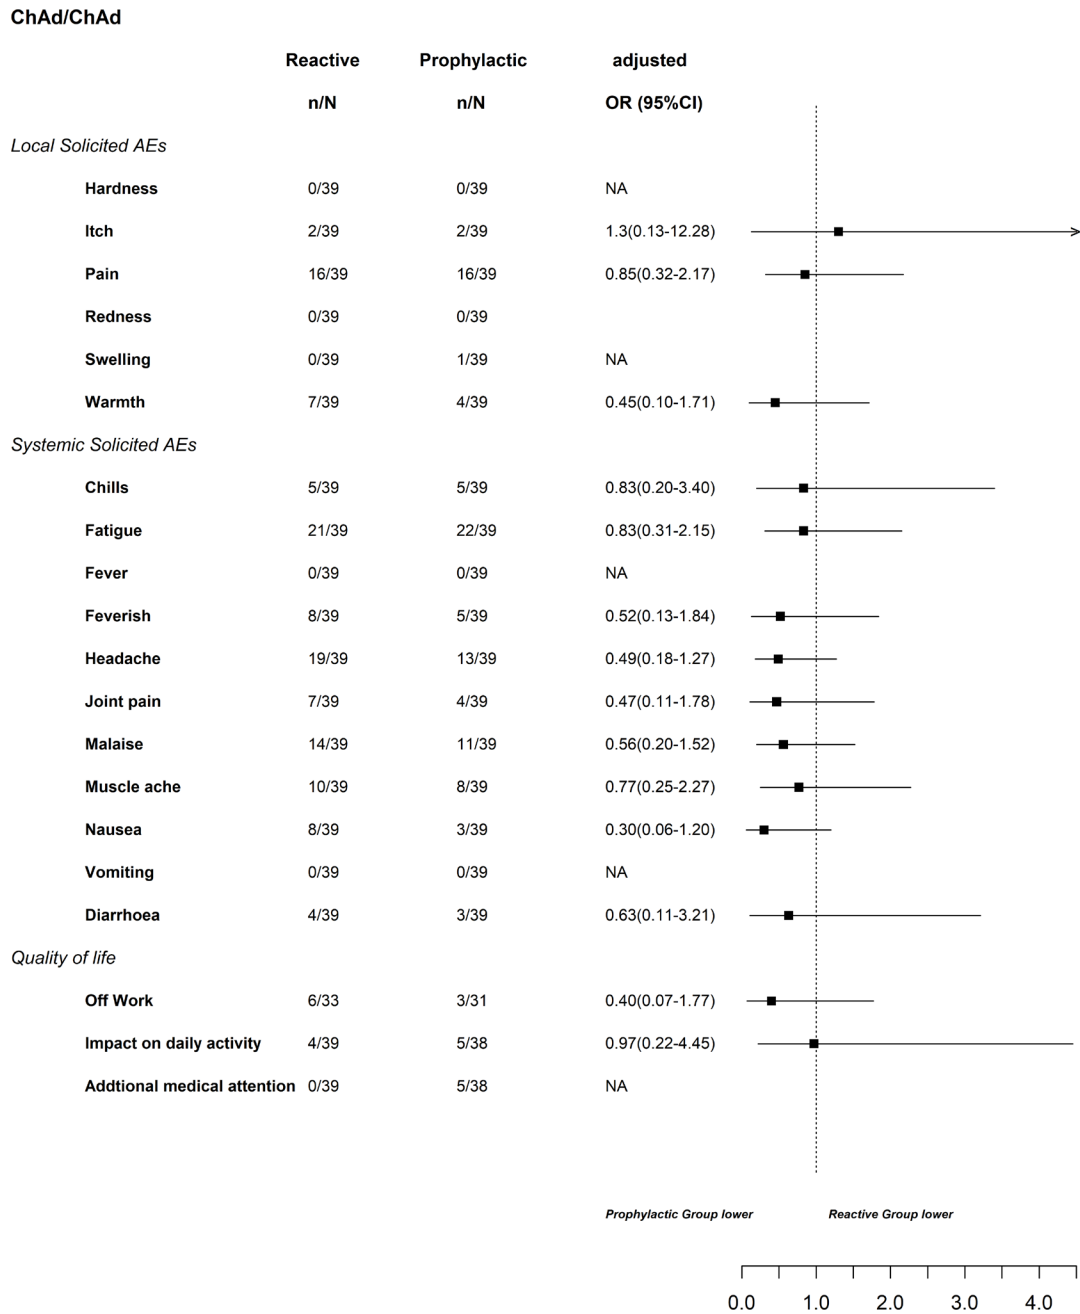

308

**ChAd/BNT**

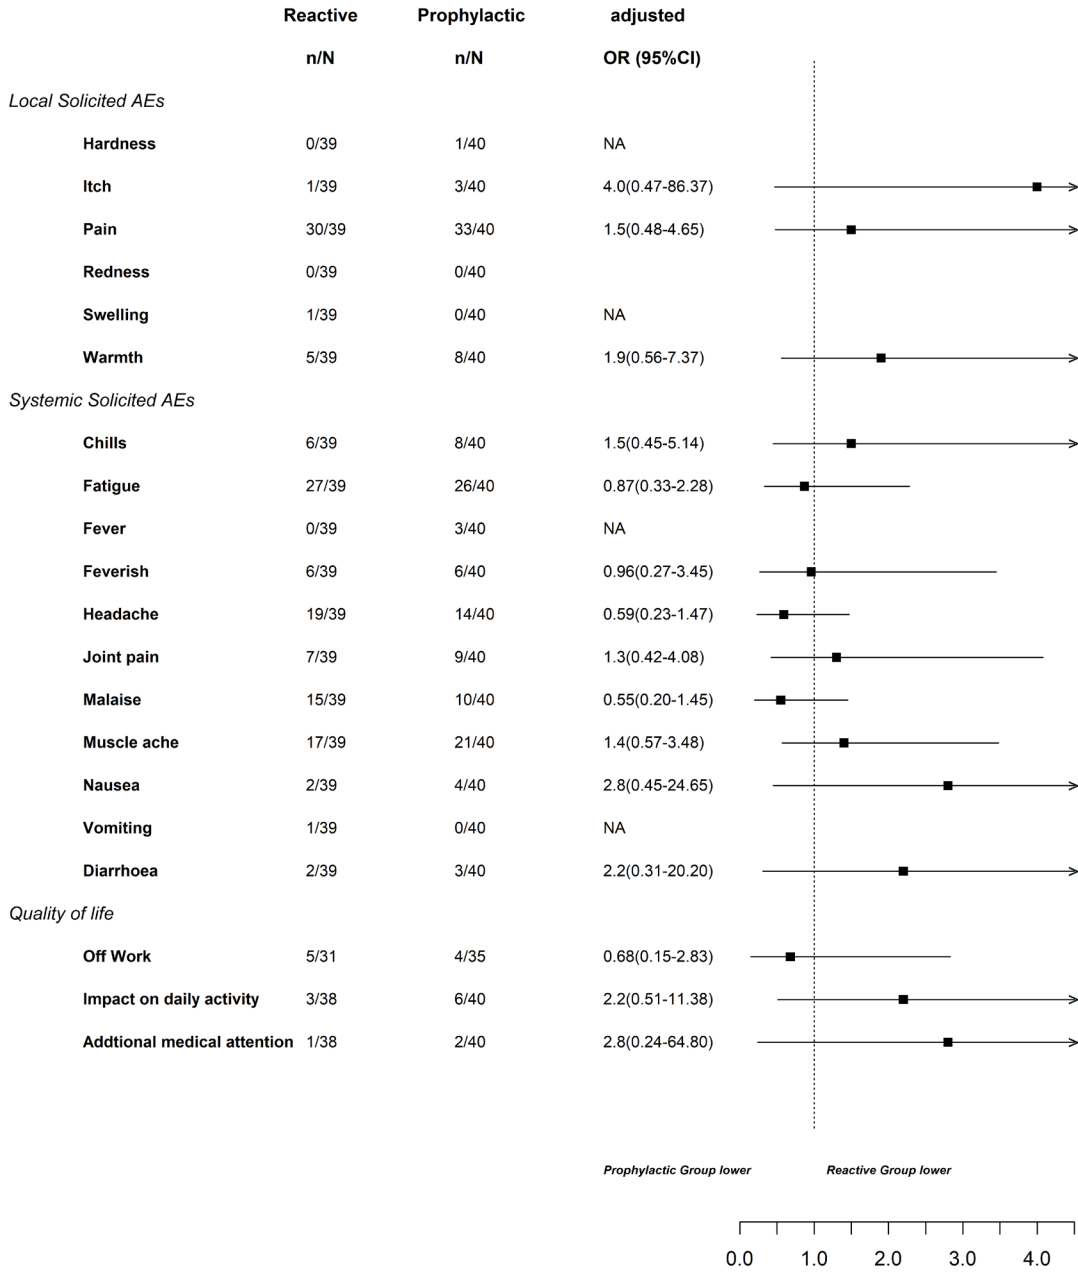



**BNT/BNT**

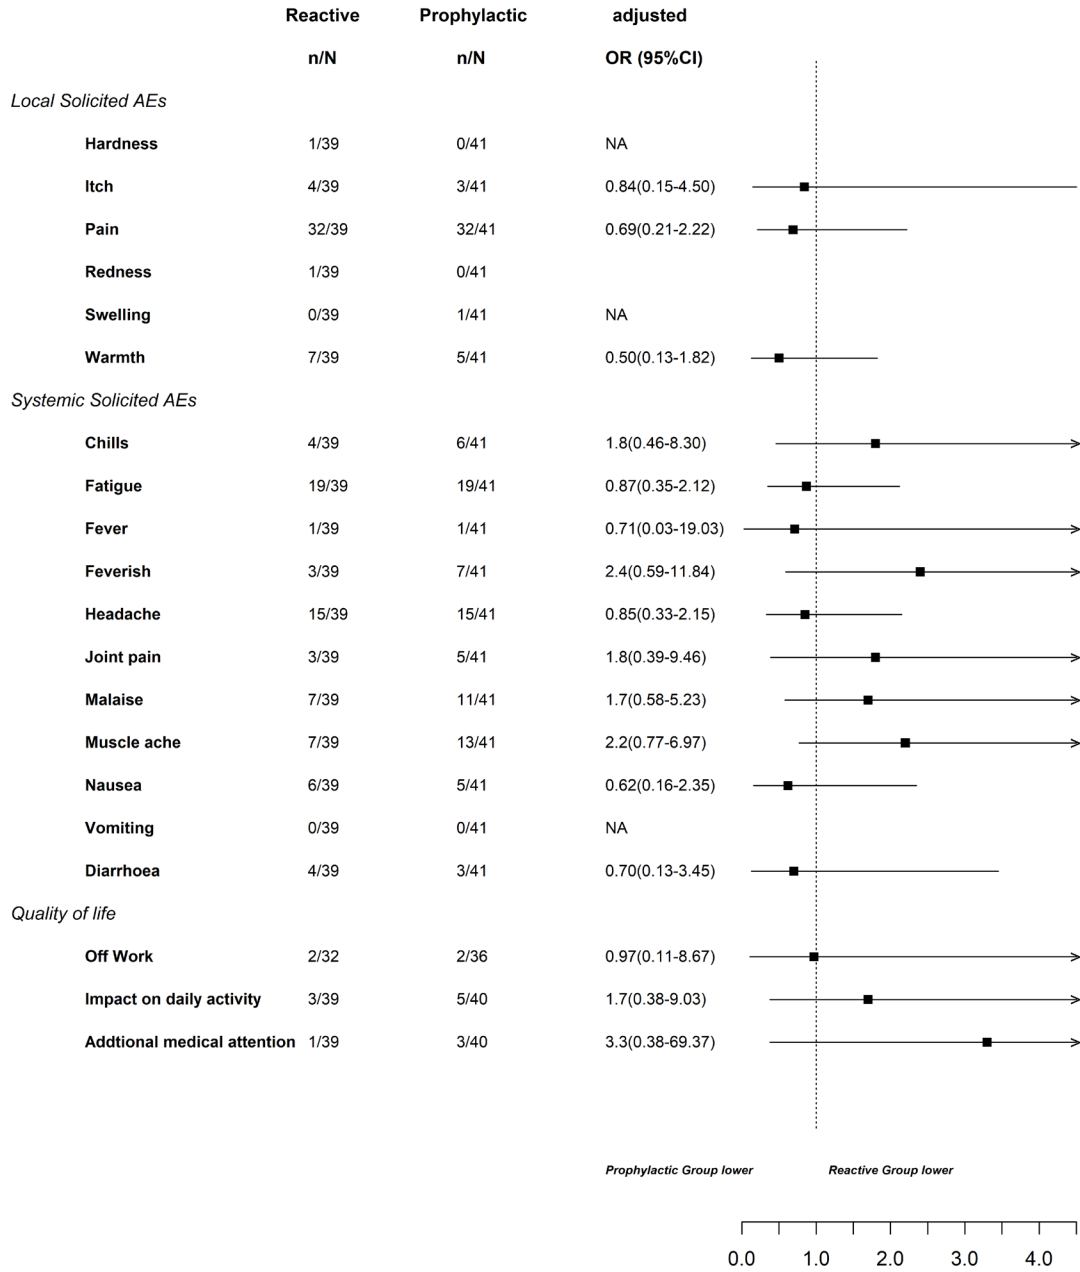

**BNT/ChAd**

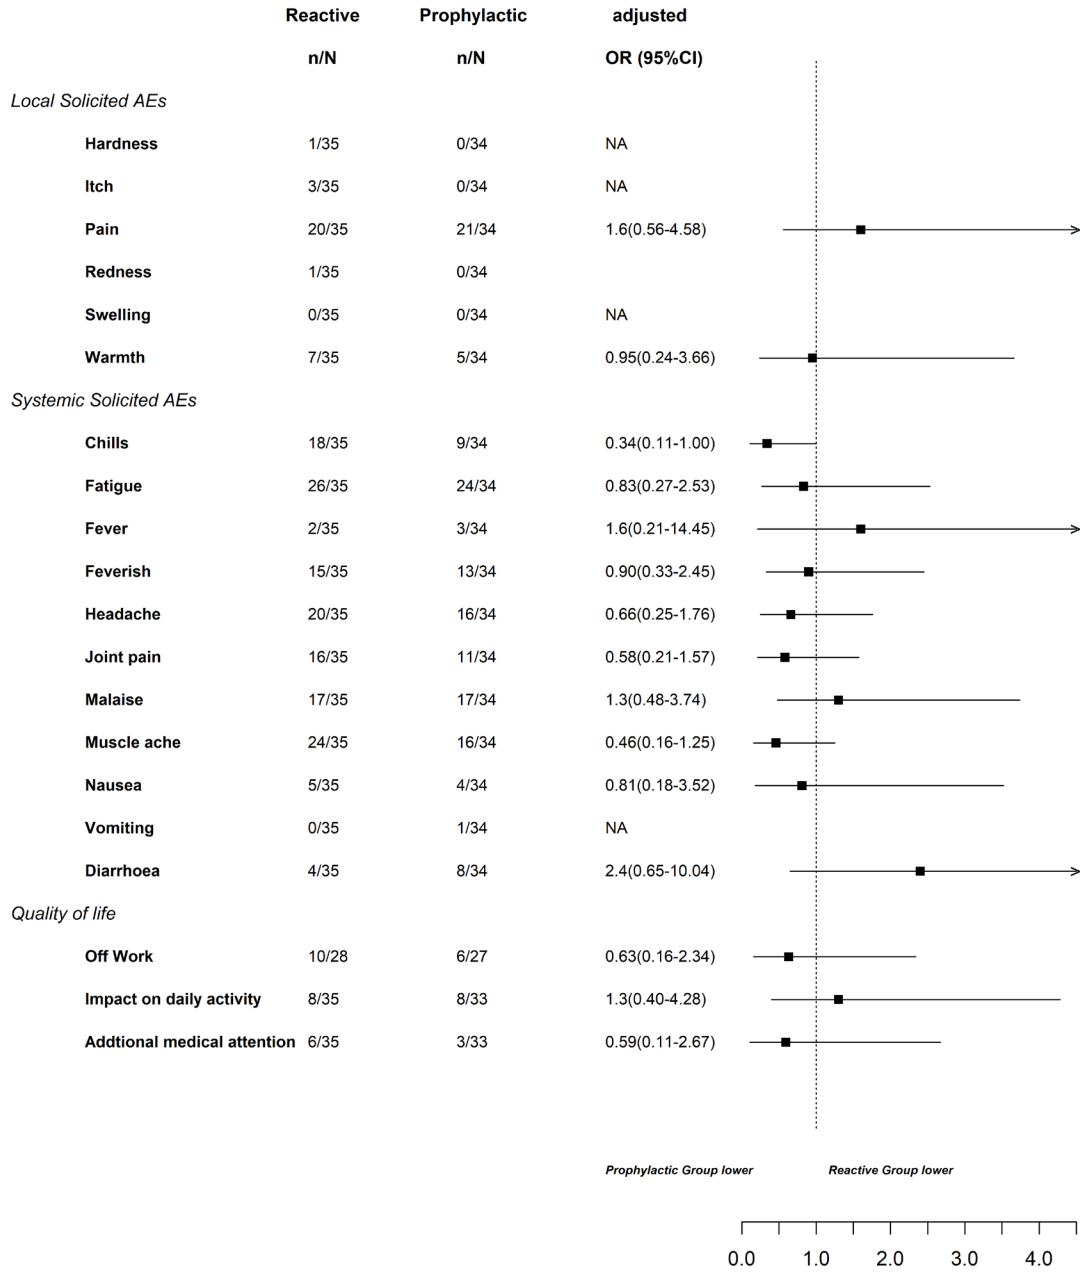

315 **Randomisation and Blinding**

316  
317 Computer-generated randomisation lists were prepared by the study statistician. Participants were block  
318 randomised (block size four) 1:1:1:1 within the immunology cohort to ChAd/ChAd, ChAd/BNT, BNT/BNT and  
319 BNT/ChAd schedules (boost interval of 28 days). General Cohort participants were block randomised (block size  
320 eight) 1:1:1:1:1:1:1:1 to ChAd/ChAd, ChAd/BNT, BNT/BNT and BNT/ChAd schedules at boosting intervals of  
321 both 28 and 84 days. Besides the stratification by cohort, randomisation was further stratified by study site.  
322 Clinical research nurses who were not involved in safety endpoint evaluation performed the randomisation using  
323 REDCap™ (the electronic data capture system) and prepared and administered vaccine.  
324 Participants and laboratory staff processing the immunogenicity endpoints were blinded to vaccines received, but  
325 not to prime-boost interval. Participant blinding to vaccines was maintained by concealing randomisation pages,  
326 preparing vaccines out of sight and applying masking tape to vaccine syringes to conceal dose volume and  
327 appearance. The clinical team assessing the safety endpoints were not blinded.

328  
329  
330  
331  
332  
333  
334  
335  
336  
337  
338  
339  
340  
341  
342

343 **Summary of correlation factors for calibration of immune assay readouts (LBA and PNA) with the WHO**  
344 **International Standard (IS) for the Nexelis laboratory**

345  
346 The assigned units for the WHO IS are @IU/mL@ for neutralising antibody activity and “BAU/mL” for the  
347 quantitation of immunoglobulins.

348

**Human SARS-CoV-2 Pre-Spike IgG ELISA**

The results generated for the Human SARS-CoV-2 PreSpike IgG ELISA are reported with concentration units in “ELU/mL”. When required a correlation factor of 1/7.9815 will be applied to convert the reported results from ELU/mL to BAU/mL. For example, a sample with reported anti-PreSpike IgG antibody concentration of 7981.5 ELU/mL will have a concentration equivalent to 1000 BAU/mL.

The following formula may be used for converting concentration units from ELU/mL to BAU/mL:

$$\text{Result (BAU/mL)} = \text{Result (ELU/mL)} / 7.9815$$

**Human SARS-CoV-2 Pseudoparticle Neutralisation Assay (PNA)**

The results generated for the Human SARS-CoV-2 (PNA) are reported with titer units “NT50”. When required, a correlation factor of 1/1.872 will be applied to convert the reported results from NT50 titer to IU/mL. For example, a sample with reported NT50 titre of 1872 will have a concentration equivalent to 1000 IU/mL.

The following formula may be used for converting NT50 titer to IU/mL:

$$\text{Result (IU/mL)} = \text{Result (NT50 titer)} / 1.872$$

349

350 **Com-COV Study Group**

351

|                           |                                                                                                                                                                                                                                                    |
|---------------------------|----------------------------------------------------------------------------------------------------------------------------------------------------------------------------------------------------------------------------------------------------|
| Alasdair P. S. Munro      | NIHR Southampton Clinical Research Facility and Biomedical Research Centre, University Hospital Southampton NHS Foundation Trust, Southampton, UK; Faculty of Medicine and Institute for Life Sciences, University of Southampton, Southampton, UK |
| Jazz Bartholomew          | NIHR Southampton Clinical Research Facility and Biomedical Research Centre, University Hospital Southampton NHS Foundation Trust, Southampton, UK; Faculty of Medicine and Institute for Life Sciences, University of Southampton, Southampton, UK |
| Laura Presland            | NIHR Southampton Clinical Research Facility and Biomedical Research Centre, University Hospital Southampton NHS Foundation Trust, Southampton, UK; Faculty of Medicine and Institute for Life Sciences, University of Southampton, Southampton, UK |
| Sarah Horswill            | NIHR Southampton Clinical Research Facility and Biomedical Research Centre, University Hospital Southampton NHS Foundation Trust, Southampton, UK; Faculty of Medicine and Institute for Life Sciences, University of Southampton, Southampton, UK |
| Sarah Warren              | NIHR Southampton Clinical Research Facility and Biomedical Research Centre, University Hospital Southampton NHS Foundation Trust, Southampton, UK; Faculty of Medicine and Institute for Life Sciences, University of Southampton, Southampton, UK |
| Sophie Varkonyi-Clifford  | NIHR Southampton Clinical Research Facility and Biomedical Research Centre, University Hospital Southampton NHS Foundation Trust, Southampton, UK; Faculty of Medicine and Institute for Life Sciences, University of Southampton, Southampton, UK |
| Stephen Saich             | NIHR Southampton Clinical Research Facility and Biomedical Research Centre, University Hospital Southampton NHS Foundation Trust, Southampton, UK; Faculty of Medicine and Institute for Life Sciences, University of Southampton, Southampton, UK |
| Kirsty Adams              | NIHR UCLH Clinical Research Facility and NIHR UCLH Biomedical Research Centre, London, UK                                                                                                                                                          |
| Marivic Ricamara          | NIHR UCLH Clinical Research Facility and NIHR UCLH Biomedical Research Centre, London, UK                                                                                                                                                          |
| Nicola Turner             | NIHR UCLH Clinical Research Facility and NIHR UCLH Biomedical Research Centre, London, UK                                                                                                                                                          |
| Nicole Y. Yee Ting        | NIHR UCLH Clinical Research Facility and NIHR UCLH Biomedical Research Centre, London, UK                                                                                                                                                          |
| Sarah Whittle             | NIHR UCLH Clinical Research Facility and NIHR UCLH Biomedical Research Centre, London, UK                                                                                                                                                          |
| Tommy Rampling            | NIHR UCLH Clinical Research Facility and NIHR UCLH Biomedical Research Centre, London, UK                                                                                                                                                          |
| Amisha Desai              | NIHR/Wellcome Trust Clinical Research Facility, University Hospitals Birmingham NHS Foundation Trust                                                                                                                                               |
| Claire H. Brown           | NIHR/Wellcome Trust Clinical Research Facility, University Hospitals Birmingham NHS Foundation Trust                                                                                                                                               |
| Ehsaan Qureshi            | NIHR/Wellcome Trust Clinical Research Facility, University Hospitals Birmingham NHS Foundation Trust                                                                                                                                               |
| Karishma Gokani           | NIHR/Wellcome Trust Clinical Research Facility, University Hospitals Birmingham NHS Foundation Trust                                                                                                                                               |
| Kush Naker                | NIHR/Wellcome Trust Clinical Research Facility, University Hospitals Birmingham NHS Foundation Trust                                                                                                                                               |
| Johanna K. Kellett Wright | North Bristol NHS Trust                                                                                                                                                                                                                            |
| Rachel L. Williams        | North Bristol NHS Trust                                                                                                                                                                                                                            |
| Tawassal Riaz             | North Bristol NHS Trust                                                                                                                                                                                                                            |
| Florentina D. Penciu      | North Bristol NHS Trust                                                                                                                                                                                                                            |
| Amy Carson                | North Bristol NHS Trust                                                                                                                                                                                                                            |
| Claudio Di Maso           | Oxford Vaccine Group, Department of Paediatrics, University of Oxford                                                                                                                                                                              |
| Gracie Mead               | Oxford Vaccine Group, Department of Paediatrics, University of Oxford                                                                                                                                                                              |
| Elizabeth G. Howe         | Oxford Vaccine Group, Department of Paediatrics, University of Oxford                                                                                                                                                                              |
| Iason Vichos              | Oxford Vaccine Group, Department of Paediatrics, University of Oxford                                                                                                                                                                              |
| Mujtaba Ghulam Farooq     | Oxford Vaccine Group, Department of Paediatrics, University of Oxford                                                                                                                                                                              |

|                             |                                                                       |
|-----------------------------|-----------------------------------------------------------------------|
| Rabiullah Noristani         | Oxford Vaccine Group, Department of Paediatrics, University of Oxford |
| Xin L. Yao                  | Oxford Vaccine Group, Department of Paediatrics, University of Oxford |
| Neil J. Oldfield            | School of Life Sciences, University of Nottingham                     |
| Daniel Hammersley           | The University of Nottingham Health Service                           |
| Sue Belton                  | The University of Nottingham Health Service                           |
| Simon Royal                 | University of Nottingham; The University of Nottingham Health Service |
| Alberto San Francisco Ramos | Vaccine Institute, St. George's, University of London                 |
| Cecilia Hultin              | Vaccine Institute, St. George's, University of London                 |
| Eva P. Galiza               | Vaccine Institute, St. George's, University of London                 |
| Rebecca Crook               | Liverpool School of Tropical Medicine, Liverpool                      |
| Marcin Bula                 | Liverpool School of Tropical Medicine, Liverpool                      |
| Fred Fyles                  | Liverpool School of Tropical Medicine, Liverpool                      |
| Hassan Burhan               | Liverpool School of Tropical Medicine, Liverpool                      |
| Flora Maelin                | Liverpool School of Tropical Medicine, Liverpool                      |
| Elen Hughes                 | Liverpool School of Tropical Medicine, Liverpool                      |
| Emmanuel Okenyi             | Liverpool School of Tropical Medicine, Liverpool                      |

352

353  
354 **Statistical Analysis Plan (SAP)**  
355

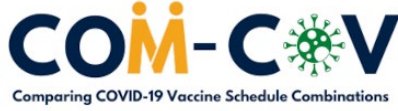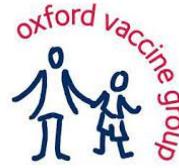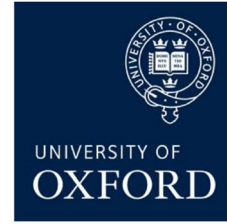

356  
357

---

**STATISTICAL ANALYSIS PLAN**

---

358 A SINGLE-BLIND, RANDOMISED, PHASE II UK MULTI-CENTRE STUDY TO DETERMINE REACTOGENICITY AND  
359 IMMUNOGENICITY OF HETEROLOGOUS PRIME/BOOST COVID-19 VACCINE SCHEDULES

360 **Short Title:** Comparing COVID-19 Vaccine Schedule Combinations (Com-COV)

361 **Ethics Ref:** 21/SC/0022

362 **IRAS Project ID:** 291055

363 **ISRCTN:** 69254139

364 **EudraCT Number:** 2020-005085-33

365 **OVG Study Number:** OVG 2020/03

366 **Oxford Protocol Date and Version No.:** V5.0 26-Apr-2021

367 **Sponsor:** University of Oxford

368 **SAP version No:** 2.0

369 **Date:** 10-May-2021

|                     | NAME          | TITLE              | SIGNATURE | DATE |
|---------------------|---------------|--------------------|-----------|------|
| <b>Written by:</b>  | Xinxue Liu    | Statistician       |           |      |
| <b>Reviewed by:</b> | Nick Andrews  | Statistician       |           |      |
| <b>Approved by:</b> | Matthew Snape | Chief Investigator |           |      |

370  
371

|     |                                                                                                           |           |
|-----|-----------------------------------------------------------------------------------------------------------|-----------|
| 372 | <b>Table of Contents</b>                                                                                  |           |
| 373 | 1                                                                                                         |           |
| 374 | .....                                                                                                     |           |
| 375 | Introduction .....                                                                                        | <b>43</b> |
| 376 | 1.1 Description of COM-COV .....                                                                          | 43        |
| 377 | 1.2 Purpose and scope of the plan .....                                                                   | 43        |
| 378 | 2                                                                                                         |           |
| 379 | .....                                                                                                     |           |
| 380 | Study Methods.....                                                                                        | <b>44</b> |
| 381 | 2.1 Sample size.....                                                                                      | 44        |
| 382 | 2.2 Randomisation.....                                                                                    | 44        |
| 383 | 2.3 Blinding and code-breaking.....                                                                       | 45        |
| 384 | 2.4 Interim analysis .....                                                                                | 45        |
| 385 | 2.5 Objectives and Outcome Measures .....                                                                 | 46        |
| 386 | 3                                                                                                         |           |
| 387 | .....                                                                                                     |           |
| 388 | Analysis – General considerations.....                                                                    | <b>48</b> |
| 389 | 4                                                                                                         |           |
| 390 | .....                                                                                                     |           |
| 391 | Definition of study population.....                                                                       | <b>49</b> |
| 392 | 5..... Primary outcome - Anti-                                                                            |           |
| 393 | spike immunoglobulins at D28 post boost (4 weeks boost group) .....                                       | <b>50</b> |
| 394 | 5.1 Population for analysis .....                                                                         | 50        |
| 395 | 5.2 Statistical analysis .....                                                                            | 50        |
| 396 | 5.3 Pooled sensitivity analysis.....                                                                      | 50        |
| 397 | 5.4 Subgroup analyses .....                                                                               | 50        |
| 398 | 5.5 Missing data .....                                                                                    | 50        |
| 399 | 6                                                                                                         |           |
| 400 | .....                                                                                                     |           |
| 401 | Secondary Outcomes – Safety .....                                                                         | <b>51</b> |
| 402 | 6.1 Populations for analysis.....                                                                         | 51        |
| 403 | 6.2 Statistical analysis .....                                                                            | 51        |
| 404 | 6.3 Missing data .....                                                                                    | 51        |
| 405 | 7.....Secondary Outcomes – Anti-spike immunoglobulins at D28 post boost (4 weeks boost group and 12 weeks |           |
| 406 | boost group).....                                                                                         | <b>51</b> |
| 407 | 7.1 Populations for analysis.....                                                                         | 51        |
| 408 | 7.2 Statistical analysis .....                                                                            | 51        |
| 409 | 8                                                                                                         |           |
| 410 | .....                                                                                                     |           |
| 411 | Secondary Outcomes – Further immunogenicity outcomes .....                                                | <b>51</b> |
| 412 | 8.1 Population for analysis .....                                                                         | 51        |
| 413 | 8.2 Statistical analysis .....                                                                            | 52        |
| 414 |                                                                                                           |           |
| 415 |                                                                                                           |           |

416 **1 Introduction**

417  
418 **1.1 Description of COM-COV**  
419

420 The COM-COV trial is a single-blind, randomised, phase II UK multi-centre study to determine reactogenicity  
421 and immunogenicity of heterologous prime/boost COVID-19 vaccine schedules, compared with homologous  
422 prime/boost schedules. The participants of this trial will be COVID-vaccine naive adults 50 years of age and above  
423 and will have no or mild-moderate, well-controlled co-morbidity. The detailed inclusion and exclusion criteria  
424 can be found in the protocol.

425 The study will consist of 2 cohorts, one for more detailed immunological assessment (immunology cohort, N=100,  
426 25 per arm) boosted at Day 28 (randomised 1:1:1:1) and one for main immunology endpoints for participants  
427 boosted at Day 28 or at Day 84 (general cohort N=720, 90 per arm) (randomised 1:1:1:1:1:1:1).  
428

| Cohort             | Group                       | Arm                  | Prime (Day 0)   | Boost (Day 28)  | Boost (Day 84)  | Visits                                 |                              |                 |
|--------------------|-----------------------------|----------------------|-----------------|-----------------|-----------------|----------------------------------------|------------------------------|-----------------|
| Immunology (n=100) | A - ChAdOx1 nCoV-19 (n=50)  | IA1 (n=25)           | ChAdOx1 nCoV-19 | ChAdOx1 nCoV-19 | -               | Day 0, 7, 14, 28, 35, 42, 56, 182, 364 |                              |                 |
|                    |                             | IA2 (n=25)           | ChAdOx1 nCoV-19 | BNT162b2        | -               |                                        |                              |                 |
|                    | B - BNT162b2 (n=50)         | IB1 (n=25)           | BNT162b2        | BNT162b2        | -               |                                        |                              |                 |
|                    |                             | IB2 (n=25)           | BNT162b2        | ChAdOx1 nCoV-19 | -               |                                        |                              |                 |
| General (n=720)    | A - ChAdOx1 nCoV-19 (n=180) | GA1-28 (n=90)        | ChAdOx1 nCoV-19 | ChAdOx1 nCoV-19 | -               | Day 0, 28, 56, 182, 364                |                              |                 |
|                    |                             | GA2-28 (n=90)        | ChAdOx1 nCoV-19 | BNT162b2        | -               |                                        |                              |                 |
|                    |                             | B - BNT162b2 (n=180) | GB1-28 (n=90)   | BNT162b2        | BNT162b2        |                                        | -                            |                 |
|                    |                             |                      | GB2-28 (n=90)   | BNT162b2        | ChAdOx1 nCoV-19 |                                        | -                            |                 |
|                    | A - ChAdOx1 nCoV-19 (n=180) | GA1-84 (n=90)        | ChAdOx1 nCoV-19 | -               | ChAdOx1 nCoV-19 |                                        | Day 0, 56, 84, 112, 182, 364 |                 |
|                    |                             | GA2-84 (n=90)        | ChAdOx1 nCoV-19 | -               | BNT162b2        |                                        |                              |                 |
|                    |                             | B - BNT162b2 (n=180) | GB1-84 (n=90)   | BNT162b2        | -               |                                        |                              | BNT162b2        |
|                    |                             |                      | GB2-84 (n=90)   | BNT162b2        | -               |                                        |                              | ChAdOx1 nCoV-19 |

429  
430  
431 **1.2 Purpose and scope of the plan**  
432

433 This document details the proposed analysis of the main paper(s) reporting results from COM-COV. The results  
434 reported in these papers should follow the strategy set out here. The scope of this analysis plan does not extend  
435 to include exploratory outcomes. Subsequent analyses of a more exploratory nature will not be bound by this  
436 strategy, though they are expected to follow the broad principles set out here. The principles are not intended to  
437 curtail exploratory analysis, nor to prohibit accepted practices, but they are intended to establish the principles  
438 that will be followed, as closely as possible, when analysing and reporting the trial. This plan will be used to  
439 produce the statistical analysis reports and main trial publications. The statisticians should review all the  
440 publications based on this plan.  
441



## 2 Study Methods

### 2.1 Sample size

The primary analysis of this study will be a non-inferiority comparison between schedules using a homologous versus heterologous boost within each group of approved COVID-19 vaccines, e.g., The group receiving ChAdOx1 nCoV-19/ BNT162b2 will be compared with the group receiving ChAdOx1 nCoV-19 / ChAdOx1 nCoV-19, whilst a separate comparison will be made between the group receiving BNT162b2 / ChAdOx1 nCoV-19 and the group receiving BNT162b2 / BNT162b2. We will combine the immunology cohort (N=100) and the general cohort boosted at D28 (N=360) in the primary analysis.

The below sample size calculation is based on the primary analysis conducted in the participants boosted at D28. The current available data from the ongoing ChAdOx1 nCoV-19 trial suggests that the Geometric mean concentration (GMC) of anti-Spike IgG measured by standardised ELISA is around 500 EU/ml at D56 (4 weeks after booster at Day 28) among participants aged 56-69 years old (n=29) with a standard deviation of 0.4.

The sample calculation is based on the following assumptions:

1. The non-inferiority margin is a 0.63 fold-difference between the GMC in the heterologous boost arm and the homologous boost arm; or a -0.2 absolute difference of GMC on the log scale (base 10).
2. The standard deviation of the GMC on the log scale (base 10) is 0.4 based on the currently available data.
3. The true difference of GMC on the log scale (base 10) is 0.

Based on the above assumptions, the study will need to recruit 86 participants, who are seronegative for SARS-CoV-2 IgG at baseline, into each arm, to achieve 90% power at the one-sided 2.5% significance level. We assume ~25% of study participants will be excluded from the primary analysis due to seropositivity for SARS-CoV-2 IgG at baseline or due to loss of follow-up. Therefore, the sample size in each arm boosted at D28 will be expanded to 115 to accommodate for this. This means that if the study has two vaccines (as is currently the case), the total sample size for participants boosted at D28 will be 460 for four arms. If we decide to add groups to the trial, as new vaccines are made available for use by the Department of Health and Social Care, the sample sizes will be adapted accordingly. The immunology cohort will be used for exploratory analyses to generate hypothesis, and thus no formal sample size calculation has been carried out for this cohort. The sample size of 25 per arm was therefore chosen based on logistical and practical constraints. This means we will have approximately 20 seronegative participants per arm for analysis.

Of note, should a correlate of protection against SARS-CoV-2 infection become apparent during the study then the sample size calculations will be re-visited to determine the power to demonstrate non-inferiority based on a margin of 10% between the above stated study arms. This may potentially result in revision of sample size. Based on the sample size anticipated for two vaccines in the study, we have summarised the study power for different proportions of protection at the one-sided significance level of 0.05 (with no adjustment for multiple testing).

| Proportion of protection | Study power |
|--------------------------|-------------|
| 0.85                     | 58%         |
| 0.9                      | 71%         |
| 0.95                     | 91%         |

We chose the sample size of 360 (effective sample size N=270) in the general cohort who will be boosted at D84 for two reasons: 1) simplifying study management and randomisation; 2) >80% power to test non-inferiority of the heterologous schedule compared with the homologous schedule at one-sided 2.5% significance level, assuming there is no interaction between vaccine schedules and prime-boost intervals. In addition, with a combined analysis (all study population, N=820) to assess the immunogenicity at D28 post boost, the study will have increased power of >95% and the conclusion will have broader generalisability to the UK population.

### 2.2 Randomisation

Computer generated randomisation list will be prepared by the study statistician. Participants will be randomised 1:1:1:1 within the immunology cohort to ChAdOx1 nCoV-19 homologous, ChAdOx1 nCoV-19 heterologous, BNT162b2 homologous and BNT162b2 heterologous groups, using block randomisation. Participants will be randomised 1:1:1:1:1:1:1:1 within the general cohort to ChAdOx1 nCoV-19 homologous, ChAdOx1 nCoV-19 heterologous, BNT162b2 homologous and BNT162b2 heterologous groups at boosting intervals of 28 and 84 days, using block randomisation. Random block sizes of 8 and 16 will be used in the general cohort and a block size of 4 will be used in the immunology cohort. The randomisation will be stratified by study sites.

495 Sub-study participants will be randomised 1:1 within the general cohort boosted at 84 days, at the time of boost  
496 visit, to be advised to take prophylactic paracetamol vs reactive paracetamol, using block randomisation. Random  
497 block sizes of 2 or 4 will be used. The randomisation will be stratified by study site and vaccine schedule.  
498

### 499 **2.3 Blinding and code-breaking**

500 The study will be single-blind. Staff involved in study delivery will be aware of which vaccine the participant is  
501 receiving (arm allocation); the participant themselves will remain blinded to their vaccine allocation. Vaccines  
502 will be prepared out of sight of the participant and the blind will be maintained by applying a masking tape over  
503 the vaccine syringe. Laboratory staff will also be blinded to the vaccine schedule received.  
504 If the clinical condition of a participant necessitates unblinding of the participant, this will be undertaken according  
505 to a trial specific working instruction and group allocation sent to the attending physician. This will be done if  
506 unblinding is thought to be relevant and likely to change clinical management.  
507  
508

### 509 **2.4 Interim analysis**

510 We will carry out an interim analysis to review the seropositivity rate at baseline after D0 immunogenicity data  
511 for approximately the first 100 participants becomes available. If there is a significant deviation from our  
512 assumption, we will adjust the sample size accordingly.  
513 On 7th April 2021, the MHRA and JCVI updated their guidance regarding the use of ChAdOx1 nCoV-19 in the  
514 under-30 age group in the UK, along with the change of guidance in a few other countries worldwide. There is an  
515 increased urgency to release the safety data in heterologous schedules. To facilitate the future vaccination strategy  
516 worldwide, the study team decided to conduct an interim analysis on the reactogenicity data in the participants  
517 boosted at 4 weeks. The analysis will be carried out once the data is cleaned and the SAP is signed off. There will  
518 be no stopping rule for this interim analysis and the analysis will not affect the continuation of the trial.  
519 The primary analysis will be carried out when the primary endpoint of D56 anti-spike IgG data become available.  
520

521 **2.5 Objectives and Outcome Measures**  
522

| Objectives                                                                                                                                                                                                                                                                                       | Outcome Measures                                              | Time point(s)                                                                      | Comparison(s)                                                   |
|--------------------------------------------------------------------------------------------------------------------------------------------------------------------------------------------------------------------------------------------------------------------------------------------------|---------------------------------------------------------------|------------------------------------------------------------------------------------|-----------------------------------------------------------------|
| <b>Primary</b>                                                                                                                                                                                                                                                                                   |                                                               |                                                                                    |                                                                 |
| 1. To determine whether the immune response in COVID seronegative participants to immunisation with heterologous prime/boost COVID-19 vaccines regimens (boosted at D28) is non-inferior to that observed following immunisation with approved homologous prime-boost regimens (boosted at D28). | Anti-spike immunoglobulins                                    | Day 56                                                                             | Primary: Non-inferiority<br>Secondary: Superiority              |
| <b>Secondary</b>                                                                                                                                                                                                                                                                                 |                                                               |                                                                                    |                                                                 |
| 2. To assess safety of heterologous prime-boost COVID-19 vaccines                                                                                                                                                                                                                                | Serious adverse events and adverse events of special interest | Throughout the study                                                               | Primary: Descriptive<br>Secondary: Superiority                  |
| 3. To determine whether the immune response in COVID seronegative participants to immunisation with heterologous prime/boost COVID-19 vaccines regimens across all dosing intervals is non-inferior to that observed following immunisation with approved homologous prime-boost regimens        | Immunogenicity: Anti-spike immunoglobulins                    | 4 weeks post boost (D56 for 28 day boost cohort, D112 for the 84 day boost cohort) | Primary: Non-inferiority<br>Secondary: Superiority              |
|                                                                                                                                                                                                                                                                                                  | Anti-spike immunoglobulins                                    | D0, 7, 14, 28, 35, 84, 112, 182, 364                                               | Primary: Descriptive<br>Secondary: Superiority                  |
|                                                                                                                                                                                                                                                                                                  | Neutralising antibodies against SARS-CoV-2                    | D0, 14, 28, 56, 84, 112, 182, 364                                                  | Primary: Descriptive<br>Secondary: Superiority/ Non-inferiority |
|                                                                                                                                                                                                                                                                                                  | Anti-nucleocapsid immunoglobulins                             | D0, 14, 28, 56, 84, 112, 182, 364                                                  | Primary: Descriptive<br>Secondary: Superiority                  |
| 4. Further characterisation of immunogenicity of heterologous & homologous prime/boost schedules*                                                                                                                                                                                                | Pseudo neutralising antibodies                                | D0, 14, 28, 56, 84, 112, 182, 364                                                  | Primary: Descriptive<br>Secondary: Superiority                  |
|                                                                                                                                                                                                                                                                                                  | Cellular immune responses by ELISpot                          | D0, 14, 28, 42, 56, 84, 112, 182, 364                                              | Primary: Descriptive<br>Secondary: Superiority                  |
|                                                                                                                                                                                                                                                                                                  | Cellular immune responses by ICS (Th1/Th2)                    | D0, 14, 42                                                                         | Primary: Descriptive<br>Secondary: Superiority                  |

\*\*D7, 14, 35 and 42 analysis only for immunology cohort (n=100)  
D28 analysis only for the immunology (n=100) and general cohorts boosted at 28 days (n=360)  
D84 analysis only for the general cohorts boosted at 84 days (n=360)  
D112 analysis only for the immunology (n=100) and general cohorts boosted at 84 days (n=360)

|                                                                                                                                                                                                                                              |                                                                                                                                              |                                                                                                               |                                                |
|----------------------------------------------------------------------------------------------------------------------------------------------------------------------------------------------------------------------------------------------|----------------------------------------------------------------------------------------------------------------------------------------------|---------------------------------------------------------------------------------------------------------------|------------------------------------------------|
|                                                                                                                                                                                                                                              | Solicited local reactions                                                                                                                    | 7 days after each immunisation                                                                                | Primary: Descriptive<br>Secondary: Superiority |
|                                                                                                                                                                                                                                              | Solicited systemic reactions                                                                                                                 | 7 days after each immunisation                                                                                | Primary: Descriptive<br>Secondary: Superiority |
| 5. Reactogenicity and safety of heterologous & homologous prime/boost schedules of COVID-19 vaccines                                                                                                                                         | Unsolicited reactions                                                                                                                        | 28 days after each immunisation                                                                               | Primary: Descriptive                           |
|                                                                                                                                                                                                                                              | Medically attended adverse reactions                                                                                                         | Up to 3 months post booster                                                                                   | Primary: Descriptive                           |
|                                                                                                                                                                                                                                              | Changes from baseline in laboratory safety measures                                                                                          | D0, 28, 35, 56 , 84, 112**                                                                                    | Primary: Descriptive<br>Secondary: Superiority |
| **D35 safety bloods only for immunology cohort (n=100)<br>D28 safety bloods only for the immunology (n=100) and general cohorts boosted at 28 days (n=360)<br>D84, 112 safety bloods only for the general cohorts boosted at 84 days (n=360) |                                                                                                                                              |                                                                                                               |                                                |
|                                                                                                                                                                                                                                              |                                                                                                                                              |                                                                                                               | Primary: Descriptive                           |
| 6. Evaluation of immunogenicity, safety and reactogenicity of COVID-19 vaccines in participants seropositive for SARS-CoV-2 IgG at baseline                                                                                                  | Immunogenicity, reactogenicity and safety endpoints as outlined above                                                                        | Time points as outlined above                                                                                 |                                                |
|                                                                                                                                                                                                                                              | Anti-spike & anti-nucleocapsid immunoglobulins, neutralising and pseudo-neutralising antibodies, cellular immune response by ICS and ELISpot |                                                                                                               | Primary: Descriptive                           |
| 7. To characterise COVID-19 infections experienced following administration of vaccination and the immune response to those infections                                                                                                       | Genome sequencing of SARS-CoV-2 viruses isolated from infected participants                                                                  | From prime dose, and within 1 week of a participant being found to be SARS-CoV-2 positive by external testing |                                                |

524 **3 Analysis – General considerations**  
525

526 The primary outcome analysis will be carried out once all primary outcome data become available. Histograms  
527 and boxplots will be used to check the distribution and for possible outliers for continuous variables. Outliers will  
528 be examined closely to confirm the validity of the data. Mathematical transformations ( $\log_{10}$ ) will be applied,  
529 where appropriate, in order to render a normal distribution. Censored data are expected for immunogenicity  
530 endpoints as these assays normally have a lower limit of detection. Data below the lower limit of detection will  
531 be imputed by a value half the lower limit of detection, prior to log transformation. Continuous variables that  
532 follow an approximately normal distribution will be summarised using means, standard deviations and range  
533 values, and number of missing values. Skewed continuous variables will be summarised using medians/geometric  
534 mean (where appropriate), inter-quartile ranges and range values, and number of missing values.  
535 Categorical/binary variables will be summarised using frequencies and percentages.

536 Baseline characteristics will be summarised for each arm to describe the study population, stratified by the  
537 immunology and general cohort. No formal statistical comparisons of baseline characteristics between randomised  
538 groups will be conducted. Participant throughput from screening, enrolment, through randomisation, vaccination,  
539 follow up and analysis will be presented in a CONSORT flow diagram(1). This will contain the numbers of  
540 participants randomly assigned to each group, receiving prime and boost vaccination, completing the study and  
541 analysed for the primary outcome. It will also include a breakdown of reasons for withdrawal and their relative  
542 time points.

543 For the primary and secondary analyses on non-inferiority comparisons (comparing ChAdOx1 nCoV-19  
544 heterologous arm with ChAdOx1 nCoV-19 homologous arm, and comparing BNT162b2 heterologous arm with  
545 BNT162b2 homologous arm), the statistical tests will be 1-sided and a p-value less than 0.025 will be considered  
546 significant. The significance level for all the other secondary analyses will be 2-sided 0.05, unless specified  
547 otherwise in the analysis section below.  
548  
549

550 **4 Definition of study population**

551

552 The populations for analyses are defined in **Table 1**.

553

554 **TABLE 1** Populations for analysis

555

| Population                                                      | Description                                                                                                                                                                                                                                                                                                                                                                                                                                                                                                                                                                                                                       |
|-----------------------------------------------------------------|-----------------------------------------------------------------------------------------------------------------------------------------------------------------------------------------------------------------------------------------------------------------------------------------------------------------------------------------------------------------------------------------------------------------------------------------------------------------------------------------------------------------------------------------------------------------------------------------------------------------------------------|
| All participants                                                | All participants screened for the trial, to be used for reporting CONSORT diagram                                                                                                                                                                                                                                                                                                                                                                                                                                                                                                                                                 |
| Safety analysis population                                      | All randomised participants who received at least 1 dose of study vaccine, including both seronegative and seropositive populations at baseline. Participants who withdraw consent will be included up to the date of their study termination. Vaccination error will be accounted for in this analysis set by assigning them to the group of schedule they actually received. Besides the schedules listed in section 1.1, there will potentially be another two additional groups for safety reporting for participants who received only one dose of study vaccine. This analysis population will be used for safety analyses. |
| Seronegative non-inferiority population (per-protocol) analysis | All randomised participants meeting the below criteria:<br>1. Seronegative at baseline (defined as cutoff index <1.0 by the Roche Elecsys anti-Sars-CoV-2 assay at D0);<br>2. With no confirmed SARS-CoV-2 infection within 14 days (inclusive) post prime vaccination;<br>3. Received the two doses of study vaccines as randomised;<br>4. With endpoint data available;<br>5. No protocol deviation on timing of vaccination or on timing of blood sample for endpoints.                                                                                                                                                        |
| Seronegative superiority population (modified ITT) analysis     | All randomised participants meeting the below criteria:<br>1. Seronegative at baseline (defined as cutoff index <1.0 by the Roche Elecsys anti-Sars-CoV-2 assay at D0);<br>2. With no confirmed SARS-CoV-2 infection within 14 days (inclusive) post prime vaccination;<br>3. Randomised;<br>4. With endpoint data available;<br>The participants will be analysed according to their randomisation irrespective of the vaccine schedules they have received, according to the intent-to-treat principle.                                                                                                                         |
| Seropositive superiority population (modified ITT) analysis     | All randomised participants meeting the below criteria:<br>1. Seropositive at baseline (defined as cutoff index <1.0 by the Roche Elecsys anti-Sars-CoV-2 assay at D0);<br>2. Randomised;<br>3. With endpoint data available;<br>The participants will be analysed according to their randomisation irrespective of the vaccine schedules they have received, according to the intent-to-treat principle.                                                                                                                                                                                                                         |
| C19P population analysis                                        | The participants who were confirmed COVID-19 positive outside this trial (self-reported) and whose date of infection >14 days post prime vaccination.                                                                                                                                                                                                                                                                                                                                                                                                                                                                             |

556

## 5 Primary outcome - Anti-spike immunoglobulins at D28 post boost (4 weeks boost group)

### 5.1 Population for analysis

The analysis population for primary outcome will be participants who were randomised to boost at 4 weeks (including both immunology and general cohorts) among the “*seronegative non-inferiority analysis population (per-protocol)*” in table 1.

### 5.2 Statistical analysis

The primary analyses for the primary outcome are the non-inferiority comparisons between ChAdOx1 nCOV-19 heterologous arm and ChAdOx1 nCOV-19 homologous arms, and between BNT162b2 heterologous arm and BNT162b2 homologous arms. The GMC of each arm will be calculated as the antilogarithm of  $\Sigma$  (log<sub>10</sub> transformed titre)/n, i.e., as the antilogarithm transformation of the mean of the log<sub>10</sub> transformed titre, where n is the number of participants in that arm. The 95% CI will be calculated as the anti-logarithm transformation of the upper and lower limits for a two-sided CI for the mean of the log<sub>10</sub> transformed titres.

Data reported as lower than the detection threshold will be imputed with a value equal to half of the threshold before the transformation.

The Geometric Mean Ratio (GMR) will be calculated as antilogarithm of the difference between the mean of the log<sub>10</sub> transformed titre in the heterologous arm and that in the homologous arms (as the reference), after adjusting the study site and cohort (immunology/general) as design variables in the linear regression model. The GMR of the heterologous arm to the homologous arm will be reported separately for the participants who have been primed with ChAdOx1 nCOV-19 and the participants who have been primed with BNT162b2. The one-sided 97.5% confidence interval of the adjusted GMR will be calculated as the antilogarithm transformation of the upper and lower 97.5% CI limits of the adjusted difference of the log<sub>10</sub> transformed means. We will claim the heterologous boost arm is non-inferior to the homologous boost arm if the lower CI of the GMR lies above 0.63, i.e. the lower CI of the difference for the log<sub>10</sub> transformed means lies above -0.2.

As a secondary analysis, we will calculate the two-sided 95% CI for the GMR in the 4 weeks boost group of the “*Seronegative superiority analysis population (modified ITT)*” defined in **table 1**. The design variables of study site and cohort will be adjusted in the linear regression model to estimate the GMR. We will claim the heterologous boost arm is superior to the homologous boost arm if the lower limit of the two-sided 95% CI lies above 1, or claim the homologous boost arm is superior to the heterologous boost arm if the upper limit of the two-sided 95% CI lies below 1.

### 5.3 Pooled sensitivity analysis

Further pooled sensitivity analyses among all participants in **5.1** will be conducted to calculate the GMR and its corresponding one-sided 97.5% CI. We will first test the interaction between schedules (heterologous/homologous) and prime vaccines (ChAdOx1 nCOV-19/ BNT162b2) using multiple regression. The dependent variable will be the log<sub>10</sub> transformed titre and the independent variables in the normal errors regression model include age at randomisation, sex, study site, ethnicity, cohort, schedule (heterologous/homologous), prime vaccine (ChAdOx1 nCOV-19/ BNT162b2), and the interaction term between schedules and prime vaccines. If no statistically significant interaction (at significance level of two-sided 0.01) is observed, we will report the pooled GMR as the antilogarithm of the coefficient of the schedule variable in the above model after removing the interaction term.

### 5.4 Subgroup analyses

Subgroup analyses for the primary outcome will be conducted using the model in **5.3** after removing the subgroup variables, where needed. The adjusted GMR and two-sided 95% CI will be presented for each subgroup. If there is no significant interaction in **5.3**, the subgroups analyses will be done in all participants in **5.1**, including:

- Age (50-59, and 60+)
- Sex (Male and Female)
- Comorbidity (With and without comorbidities at baseline, including cardiovascular diseases, respiratory diseases, and diabetes)

### 5.5 Missing data

There will no missing data (by definition) on outcome in the “*seronegative non-inferiority analysis population (per-protocol)*” and the “*Seronegative superiority analysis population (modified ITT)*”. For covariates in the

617 sensitivity analyses and subgroup analyses, missing data will not be imputed and a complete-case analysis will be  
618 informed.  
619

## 620 **6 Secondary Outcomes – Safety**

621  
622 This section covers outcome 2, outcome 5, and the safety part of outcome 6. The definitions of safety outcomes  
623 and the corresponding severity deflections can be found in the trial protocol (section 13 Safety Reporting).  
624

### 625 **6.1 Populations for analysis**

626  
627 The population for analysis will follow the “*Safety analysis population*” in **Table 1**. For outcome 6, the analysis  
628 population will be the seropositive participants at baseline in the “*Safety analysis population*”.  
629

### 630 **6.2 Statistical analysis**

631  
632 All the safety endpoints will be summarised by the actually received vaccine schedules. Solicited AEs (Day 0 –  
633 Day 7) will be reported separately after prime vaccine and after boost vaccine. The primary analysis of safety  
634 outcomes will be descriptive and the frequency and proportion will be reported. For solicited AEs, the analysis  
635 will be carried out on each day after vaccination. The maximum severity of each solicited AEs across Day 0 –  
636 Day 7 post vaccination will also be derived for each participant, and the frequency and proportion of the maximum  
637 severity across 7 days will be summarised by vaccine schedules.

638 The SAEs, AEs (including unsolicited AEs, medically attended AEs), and AESIs will be coded by MedDRA and  
639 the frequency will be reported at the Preferred Term level. The proportion and the exact 95% CI will be reported  
640 by vaccine schedules for participants with at least one SAE, with at least one AE, and with at least one AESI,  
641 respectively.

642 Fisher's exact test will be used to compare the difference in proportions of safety outcomes between heterologous  
643 arm and homologous arm as secondary analyses. For each solicited AE, we will compare the proportions of  
644 participants with grade 3/4 AEs across 7 days post vaccination. The comparison will be done separately for  
645 participants primed with ChAdOx1 nCoV-19 and BNT162b2.  
646

### 647 **6.3 Missing data**

648  
649 It is expected that there will be missing on the self-reported diary data. The completeness of diary data will be  
650 described by vaccine schedules, and there will be no missing data imputation for diary data. The maximum  
651 severity will be derived based on all the available data across 7 days. We will exclude participants in the 7-day  
652 solicited AEs analysis if they failed to report any diary data at all in the 7 days post vaccination (for prime dose  
653 and boost dose, respectively).  
654

## 655 **7 Secondary Outcomes – Anti-spike immunoglobulins at D28 post boost (4 weeks boost group and 12 656 weeks boost group)**

### 657 **7.1 Populations for analysis**

658  
659 The primary analysis population will be the “*seronegative non-inferiority analysis population (per-protocol)*” in  
660 table 1, including participants boosted at both 4 weeks and 12 weeks.  
661  
662

### 663 **7.2 Statistical analysis**

664  
665 We will conduct the analyses following **section 5**. In the pooled sensitivity analysis (**section 5.3**), an additional  
666 independent variable of boost group (4 weeks /12 weeks) will be added into the model. The interaction between  
667 schedule and boost group will be further tested with significance level of two-sided 0.01. A further subgroup will  
668 be conducted in participants boosted at 12 weeks.  
669

## 670 **8 Secondary Outcomes – Further immunogenicity outcomes**

671  
672 This section covers outcome 4, the immunogenicity part of outcome 6, and outcome 7.  
673

### 674 **8.1 Population for analysis**

675



676 The analysis population will be the “*Seronegative superiority analysis population (modified ITT)*” for outcome  
677 4, “*Seropositive superiority analysis population (modified ITT)*” for outcome 6, and “*C19P analysis population*”  
678 for outcome 7.

679

## 680 **8.2 Statistical analysis**

681

682 The summary of immunogenicity outcomes will be presented by the randomised arms for outcome 4 and outcome  
683 6. For outcome 7, the summary for the whole analysis population will be presented.

684 The primary analysis will be descriptive. Data transformation will follow **section 3**. The GMCs with 95% CI will  
685 be presented for each arm at each time point. The GMR with 95% CIs between heterologous arm and homologous  
686 arm will be calculated separately among participants primed with ChAdOx1 nCoV-19 and BNT162b2 (follows  
687 section 5.2). The proportion of participants who have a post-vaccine seroconversion ( $\geq$  4-fold rise in titres from  
688 D0 value to 28 days post each dose) as measured by anti-spike immunoglobulins or neutralising antibodies will  
689 also be provided by randomised arms. As a high proportion of participants under lower detection threshold is  
690 expected at D0, especially in seronegative participants, the proportion of participants with data above the threshold  
691 will also be generated for each arm at each time point.

692 The comparisons of GMC between the heterologous and homologous arms at different time points will be carried  
693 out using linear regression model adjusting for study site and cohort as secondary analyses. In cases where a  
694 normal distribution cannot be rendered, comparisons will be made using the Mann-Whitney U Test. The  
695 significance level is detailed in **section 3**. As the study is not powered to detect any difference for secondary  
696 outcomes, any significant result should be interpreted cautiously, owing to the large number of comparisons within  
697 this trial and increased chance of Type I error by multiple testing.

698 For the endpoint of neutralising antibodies against SARS-CoV-2 at D28 post boost, we will carry out a non-  
699 inferiority comparison following 5.1 and 5.2.

700

701 **AMENDMENT HISTORY**  
702

| Amendment No. | SAP Version No. | Date issued              | Author(s) of changes | Details of Changes made                                                                                                                          |
|---------------|-----------------|--------------------------|----------------------|--------------------------------------------------------------------------------------------------------------------------------------------------|
|               | 1.0             | 20 <sup>th</sup><br>2021 | Apr XL/NA/MS         | Initial version                                                                                                                                  |
| 1             | 2.0             |                          | XL                   | Change the definition of D0 seronegativity from using anti-S to using anti-N;<br>Adding cohort as an additional variable to adjust in the model. |

703  
704

705 **Reference**

- 706 1. Schulz KF, Altman DG, Moher D. CONSORT 2010 Statement: Updated guidelines for reporting parallel  
707 group randomised trials. BMJ [Internet]. 2010 Mar 27 [cited 2021 Apr 13];340(7748):698–702. Available  
708 from: <https://www.bmj.com/content/340/bmj.c332>

709  
710  
711  
712  
713  
714  
715  
716  
717  
718  
719  
720  
721  
722  
723  
724  
725  
726  
727  
728  
729  
730  
731  
732  
733  
734  
735  
736  
737  
738  
739  
740  
741  
742  
743  
744  
745  
746  
747  
748  
749

750

**Protocol**

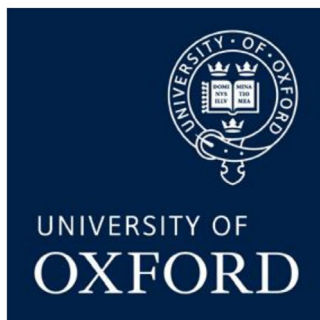

751  
752  
753  
754  
755  
756  
757  
758  
759  
760  
761  
762  
763

**Study Title:** A single-blind, randomised, phase II UK multi-centre study to determine reactogenicity and immunogenicity of heterologous prime/boost COVID-19 vaccine schedules

**Short Title:** Comparing COVID-19 Vaccine Schedule Combinations (Com-COV)

**Ethics Ref:** 21/SC/0022

**IRAS Project ID:** 291055

**ISRCTN:** 69254139

**EudraCT Number:** 2020-005085-33

**OVG Study Number:** OVG 2020/03

**Date and Version No:** V9.0 07-Sep-2021

**Chief Investigator:** Associate Professor Matthew Snape  
Centre for Clinical Vaccinology and Tropical Medicine  
University of Oxford,  
Churchill Hospital, Old Road, Headington, Oxford, OX3 7LE

**Investigators:** P Heath  
S Faust  
A Finn  
C Green  
R Lazarus  
M Ramasamy  
D Turner  
A Collins  
V Libri  
B Hallis  
K Ewer  
T Lambe

**Sponsor:** University of Oxford  
**Funder:** UK Vaccine Task Force and National Institute Health Research (NIHR)

**Chief Investigator:** Associate Professor Matthew Snape  
**Signature:**  
**Statistician Signature:** Xinxue Liu, Oxford  
Nick Andrews, PHE

764  
765  
766  
767  
768  
769  
770  
771  
772  
773  
774

**Trial Title:** A single-blind, randomised, phase II UK multi-centre study to determine reactogenicity and immunogenicity of heterologous prime/boost COVID-19 vaccine schedules

**EudraCT Number:** 2020-005085-33

**Protocol Date and Version No:** V9.0 20-Aug-2021

Protocol signature page

The undersigned has read and understood the trial protocol detailed above and agrees to conduct the trial in compliance with the protocol.

775

---

|                        |           |                        |      |
|------------------------|-----------|------------------------|------|
| Principal Investigator | Signature | Site name or ID number | Date |
|------------------------|-----------|------------------------|------|

|     |                                                                                  |                  |
|-----|----------------------------------------------------------------------------------|------------------|
| 776 | <b>1. TABLE OF CONTENTS</b>                                                      |                  |
| 777 |                                                                                  |                  |
| 778 | <b>1.</b>                                                                        |                  |
| 779 | .....                                                                            |                  |
| 780 | <b>TABLE OF CONTENTS .....</b>                                                   | <b>55</b>        |
| 781 | <b>2</b>                                                                         |                  |
| 782 | .....                                                                            |                  |
| 783 | <b>KEY TRIAL CONTACTS.....</b>                                                   | <b>62</b>        |
| 784 | <b>3</b>                                                                         |                  |
| 785 | .....                                                                            |                  |
| 786 | <b>CONFLICT OF INTEREST DECLARATION.....</b>                                     | <b>63</b>        |
| 787 | <b>4</b>                                                                         |                  |
| 788 | .....                                                                            |                  |
| 789 | <b>LAY SUMMARY .....</b>                                                         | <b>63</b>        |
| 790 | <b>5</b>                                                                         |                  |
| 791 | .....                                                                            |                  |
| 792 | <b>SYNOPSIS.....</b>                                                             | <b>64</b>        |
| 793 | <b>6</b>                                                                         |                  |
| 794 | .....                                                                            |                  |
| 795 | <b>ABBREVIATIONS.....</b>                                                        | <b>67</b>        |
| 796 | <b>7</b>                                                                         |                  |
| 797 | .....                                                                            |                  |
| 798 | <b>BACKGROUND AND RATIONALE .....</b>                                            | <b>69</b>        |
| 799 | <b>7.1</b>                                                                       |                  |
| 800 | .....                                                                            |                  |
| 801 | <b>Potential benefits.....</b>                                                   | <b>71</b>        |
| 802 | <b>7.2</b>                                                                       |                  |
| 803 | .....                                                                            |                  |
| 804 | <b>Potential risks.....</b>                                                      | <b>71</b>        |
| 805 | <b>7.2.1</b>                                                                     |                  |
| 806 | .....                                                                            |                  |
| 807 | <b>Associated with phlebotomy .....</b>                                          | <b>71</b>        |
| 808 | <b>7.2.2</b>                                                                     |                  |
| 809 | .....                                                                            |                  |
| 810 | <b>Associated with saliva sampling .....</b>                                     | <b>71</b>        |
| 811 | <b>7.2.3</b>                                                                     |                  |
| 812 | .....                                                                            |                  |
| 813 | <b>Associated with nasal fluid sampling .....</b>                                | <b>71</b>        |
| 814 | <b>7.2.4</b>                                                                     |                  |
| 815 | .....                                                                            |                  |
| 816 | <b>Allergic reactions .....</b>                                                  | <b>71</b>        |
| 817 | <b>7.2.5</b>                                                                     |                  |
| 818 | .....                                                                            |                  |
| 819 | <b>Behaviour change .....</b>                                                    | <b>71</b>        |
| 820 | <b>7.2.6</b>                                                                     |                  |
| 821 | .....                                                                            |                  |
| 822 | <b>Specific risk from vaccines.....</b>                                          | <b>71</b>        |
| 823 | <b>7.2.7.....</b>                                                                | <b>Increased</b> |
| 824 | <b>reactogenicity from heterologous prime/boost immunisation schedules .....</b> | <b>71</b>        |
| 825 | <b>7.2.8</b>                                                                     |                  |
| 826 | .....                                                                            |                  |
| 827 | <b>Antibody Dependant Enhancement and Immunopathology .....</b>                  | <b>72</b>        |
| 828 | <b>7.2.9.....</b>                                                                | <b>Emerging</b>  |
| 829 | <b>Thrombosis with Thrombocytopenia Association with vaccination.....</b>        | <b>72</b>        |
| 830 | <b>7.2.10</b>                                                                    |                  |
| 831 | .....                                                                            |                  |
| 832 | <b>Unwanted media attention .....</b>                                            | <b>72</b>        |
| 833 | <b>8</b>                                                                         |                  |
| 834 | .....                                                                            |                  |
| 835 | <b>OBJECTIVES AND OUTCOME MEASURES .....</b>                                     | <b>72</b>        |

|     |                                                         |           |
|-----|---------------------------------------------------------|-----------|
| 836 | <b>9</b>                                                |           |
| 837 | .....                                                   |           |
| 838 | <b>TRIAL DESIGN</b> .....                               | <b>74</b> |
| 839 | <b>9.1</b>                                              |           |
| 840 | .....                                                   |           |
| 841 | <b>Setting</b> .....                                    | <b>74</b> |
| 842 | <b>9.2</b>                                              |           |
| 843 | .....                                                   |           |
| 844 | <b>Trial duration</b> .....                             | <b>74</b> |
| 845 | <b>9.3</b>                                              |           |
| 846 | .....                                                   |           |
| 847 | <b>Study groups</b> .....                               | <b>74</b> |
| 848 | <b>10</b>                                               |           |
| 849 | .....                                                   |           |
| 850 | <b>PARTICIPANT IDENTIFICATION</b> .....                 | <b>76</b> |
| 851 | <b>10.1</b>                                             |           |
| 852 | .....                                                   |           |
| 853 | <b>Trial Participants</b> .....                         | <b>76</b> |
| 854 | <b>10.2</b>                                             |           |
| 855 | .....                                                   |           |
| 856 | <b>Inclusion Criteria</b> .....                         | <b>76</b> |
| 857 | <b>10.3</b>                                             |           |
| 858 | .....                                                   |           |
| 859 | <b>Exclusion Criteria</b> .....                         | <b>76</b> |
| 860 | <b>10.3.1</b>                                           |           |
| 861 | .....                                                   |           |
| 862 | <b>Sub-study (Paracetamol) Exclusion criteria</b> ..... | <b>77</b> |
| 863 | <b>10.3.2</b>                                           |           |
| 864 | .....                                                   |           |
| 865 | <b>Temporary exclusion criteria</b> .....               | <b>77</b> |
| 866 | <b>11</b>                                               |           |
| 867 | .....                                                   |           |
| 868 | <b>TRIAL PROCEDURES</b> .....                           | <b>77</b> |
| 869 | <b>11.1</b>                                             |           |
| 870 | .....                                                   |           |
| 871 | <b>Recruitment</b> .....                                | <b>77</b> |
| 872 | <b>11.1.1</b>                                           |           |
| 873 | .....                                                   |           |
| 874 | <b>Identification of volunteers</b> .....               | <b>77</b> |
| 875 | <b>11.2</b>                                             |           |
| 876 | .....                                                   |           |
| 877 | <b>Screening and Eligibility Assessment</b> .....       | <b>78</b> |
| 878 | <b>11.2.1</b>                                           |           |
| 879 | .....                                                   |           |
| 880 | <b>Initial screening</b> .....                          | <b>78</b> |
| 881 | <b>11.2.2</b>                                           |           |
| 882 | .....                                                   |           |
| 883 | <b>Telephone screening visit(s)</b> .....               | <b>78</b> |
| 884 | <b>11.2.3</b>                                           |           |
| 885 | .....                                                   |           |
| 886 | <b>Screening during Visit 1</b> .....                   | <b>78</b> |
| 887 | <b>11.3</b>                                             |           |
| 888 | .....                                                   |           |
| 889 | <b>Informed Consent</b> .....                           | <b>78</b> |
| 890 | <b>11.4</b>                                             |           |
| 891 | .....                                                   |           |
| 892 | <b>Randomisation</b> .....                              | <b>79</b> |
| 893 | <b>11.4.1</b>                                           |           |
| 894 | .....                                                   |           |
| 895 | <b>Randomisation to vaccine schedules</b> .....         | <b>79</b> |

|     |                                                                             |                     |
|-----|-----------------------------------------------------------------------------|---------------------|
| 896 | <b>11.4.2</b>                                                               |                     |
| 897 | .....                                                                       |                     |
| 898 | <b>Randomisation to paracetamol use</b> .....                               | <b>79</b>           |
| 899 | <b>11.5</b>                                                                 |                     |
| 900 | .....                                                                       |                     |
| 901 | <b>Blinding and code-breaking</b> .....                                     | <b>79</b>           |
| 902 | <b>11.6</b>                                                                 |                     |
| 903 | .....                                                                       |                     |
| 904 | <b>Visits</b> .....                                                         | <b>79</b>           |
| 905 | <b>11.6.1</b> .....                                                         | <b>Visit 1</b>      |
| 906 | <b>(D0): Final eligibility check, Enrolment and Vaccination visit</b> ..... | <b>80</b>           |
| 907 | <b>11.6.1.1</b>                                                             |                     |
| 908 | .....                                                                       |                     |
| 909 | <b>Informed consent</b> .....                                               | <b>80</b>           |
| 910 | <b>11.6.1.2</b>                                                             |                     |
| 911 | .....                                                                       |                     |
| 912 | <b>Final Eligibility Check V1</b> .....                                     | <b>80</b>           |
| 913 | <b>11.6.1.3</b>                                                             |                     |
| 914 | .....                                                                       |                     |
| 915 | <b>Vaccination at V1</b> .....                                              | <b>80</b>           |
| 916 | <b>11.6.1.4</b>                                                             |                     |
| 917 | .....                                                                       |                     |
| 918 | <b>Diary cards</b> .....                                                    | <b>80</b>           |
| 919 | <b>11.6.2</b>                                                               |                     |
| 920 | .....                                                                       |                     |
| 921 | <b>Booster Vaccination</b> .....                                            | <b>81</b>           |
| 922 | <b>11.6.3</b>                                                               |                     |
| 923 | .....                                                                       |                     |
| 924 | <b>Subsequent visits</b> .....                                              | <b>81</b>           |
| 925 | <b>11.6.5</b>                                                               |                     |
| 926 | .....                                                                       |                     |
| 927 | <b>Participants under quarantine</b> .....                                  | <b>82</b>           |
| 928 | <b>11.6.6</b> .....                                                         | <b>Participants</b> |
| 929 | <b>with confirmed SARS-CoV-2 infection (COVID-19 Pathway)</b> .....         | <b>82</b>           |
| 930 | <b>11.6.7</b>                                                               |                     |
| 931 | .....                                                                       | <b>Adm</b>          |
| 932 | <b>ission of participants to hospital with COVID-19 infection</b> .....     | <b>83</b>           |
| 933 | <b>11.7</b>                                                                 |                     |
| 934 | .....                                                                       |                     |
| 935 | <b>Sample Handling</b> .....                                                | <b>83</b>           |
| 936 | <b>11.7.1</b>                                                               |                     |
| 937 | .....                                                                       |                     |
| 938 | <b>Sample handling for trial purposes</b> .....                             | <b>83</b>           |
| 939 | <b>11.7.1.1</b>                                                             |                     |
| 940 | .....                                                                       |                     |
| 941 | <b>Immunology blood tests</b> .....                                         | <b>83</b>           |
| 942 | <b>11.7.1.2</b>                                                             |                     |
| 943 | .....                                                                       |                     |
| 944 | <b>Nasal fluid &amp; saliva samples</b> .....                               | <b>84</b>           |
| 945 | <b>11.7.1.3</b>                                                             |                     |
| 946 | .....                                                                       |                     |
| 947 | <b>Nasopharyngeal swabs</b> .....                                           | <b>84</b>           |
| 948 | <b>11.7.2</b>                                                               |                     |
| 949 | .....                                                                       |                     |
| 950 | <b>Sample handling for standard of care</b> .....                           | <b>84</b>           |
| 951 | <b>11.7.2.1</b>                                                             |                     |
| 952 | .....                                                                       |                     |
| 953 | <b>Safety monitoring blood tests</b> .....                                  | <b>84</b>           |

|      |                                                                           |                |
|------|---------------------------------------------------------------------------|----------------|
| 954  | <b>11.8</b>                                                               |                |
| 955  | .....                                                                     |                |
| 956  | <b>Early Discontinuation/Withdrawal of Participants</b> .....             | <b>84</b>      |
| 957  | <b>11.8.1</b>                                                             |                |
| 958  | .....                                                                     | <b>Cont</b>    |
| 959  | <b>raindications to receipt of second (booster) dose of vaccine</b> ..... | <b>85</b>      |
| 960  | <b>11.9</b>                                                               |                |
| 961  | .....                                                                     |                |
| 962  | <b>Definition of End of Trial</b> .....                                   | <b>85</b>      |
| 963  | <b>12</b>                                                                 |                |
| 964  | .....                                                                     |                |
| 965  | <b>TRIAL INTERVENTIONS</b> .....                                          | <b>85</b>      |
| 966  | <b>12.1</b>                                                               |                |
| 967  | .....                                                                     |                |
| 968  | <b>Investigational Medicinal Product(s) (IMP) Description</b> .....       | <b>85</b>      |
| 969  | <b>12.1.1.1</b> .....                                                     | <b>Vaccine</b> |
| 970  | <b>A – AstraZeneca COVID-19 vaccine (ChAdOx1 nCOV-19)</b> .....           | <b>85</b>      |
| 971  | <b>12.1.1.2</b>                                                           |                |
| 972  | .....                                                                     |                |
| 973  | <b>Dosage, scheduling and packaging</b> .....                             | <b>85</b>      |
| 974  | <b>12.1.2</b>                                                             |                |
| 975  | .....                                                                     |                |
| 976  | <b>VACCINE B – Pfizer BioNTech (BNT162b2)</b> .....                       | <b>86</b>      |
| 977  | <b>12.1.2.1</b>                                                           |                |
| 978  | .....                                                                     |                |
| 979  | <b>Dosage, scheduling and packaging</b> .....                             | <b>86</b>      |
| 980  | <b>12.1.3</b>                                                             |                |
| 981  | .....                                                                     |                |
| 982  | <b>Blinding of IMPs</b> .....                                             | <b>86</b>      |
| 983  | <b>12.1.4</b>                                                             |                |
| 984  | .....                                                                     |                |
| 985  | <b>Storage of IMP</b> .....                                               | <b>86</b>      |
| 986  | <b>12.1.4.1</b> .....                                                     | <b>Vaccine</b> |
| 987  | <b>A – AstraZeneca COVID-19 vaccine (ChAdOx1 nCOV-19)</b> .....           | <b>86</b>      |
| 988  | <b>12.1.4.2</b>                                                           |                |
| 989  | .....                                                                     |                |
| 990  | <b>Vaccine B - Pfizer BioNTech (BNT162b2)</b> .....                       | <b>86</b>      |
| 991  | <b>12.1.5</b>                                                             |                |
| 992  | .....                                                                     |                |
| 993  | <b>Compliance with Trial Treatment</b> .....                              | <b>87</b>      |
| 994  | <b>12.1.6</b>                                                             |                |
| 995  | .....                                                                     |                |
| 996  | <b>Accountability of the Trial Treatment</b> .....                        | <b>87</b>      |
| 997  | <b>12.1.7</b>                                                             |                |
| 998  | .....                                                                     |                |
| 999  | <b>Concomitant Medication</b> .....                                       | <b>87</b>      |
| 1000 | <b>12.1.8</b>                                                             |                |
| 1001 | .....                                                                     |                |
| 1002 | <b>Post-trial Treatment</b> .....                                         | <b>87</b>      |
| 1003 | <b>12.2</b>                                                               |                |
| 1004 | .....                                                                     |                |
| 1005 | <b>Other Treatments (non-IMPS)</b> .....                                  | <b>87</b>      |
| 1006 | <b>12.3</b>                                                               |                |
| 1007 | .....                                                                     |                |
| 1008 | <b>Other Interventions</b> .....                                          | <b>87</b>      |
| 1009 | <b>13</b>                                                                 |                |
| 1010 | .....                                                                     |                |
| 1011 | <b>SAFETY REPORTING</b> .....                                             | <b>87</b>      |

|      |                                                                       |                |
|------|-----------------------------------------------------------------------|----------------|
| 1012 | <b>13.1</b>                                                           |                |
| 1013 | .....                                                                 |                |
| 1014 | <b>Safety reporting window</b> .....                                  | <b>87</b>      |
| 1015 | <b>13.2</b>                                                           |                |
| 1016 | .....                                                                 |                |
| 1017 | <b>Adverse Event Definitions</b> .....                                | <b>87</b>      |
| 1018 | <b>13.3</b>                                                           |                |
| 1019 | .....                                                                 | <b>Assessm</b> |
| 1020 | <b>ent results outside of normal parameters as AEs and SAEs</b> ..... | <b>88</b>      |
| 1021 | <b>13.3.1</b>                                                         |                |
| 1022 | .....                                                                 |                |
| 1023 | <b>Clinical</b> .....                                                 | <b>88</b>      |
| 1024 | <b>13.3.2</b>                                                         |                |
| 1025 | .....                                                                 |                |
| 1026 | <b>Laboratory</b> .....                                               | <b>88</b>      |
| 1027 | <b>13.4</b>                                                           |                |
| 1028 | .....                                                                 |                |
| 1029 | <b>Assessment of severity</b> .....                                   | <b>89</b>      |
| 1030 | <b>13.5</b>                                                           |                |
| 1031 | .....                                                                 |                |
| 1032 | <b>Assessment of Causality</b> .....                                  | <b>90</b>      |
| 1033 | <b>13.6</b>                                                           |                |
| 1034 | .....                                                                 |                |
| 1035 | <b>Procedures for Reporting Adverse Events</b> .....                  | <b>91</b>      |
| 1036 | <b>13.6.1</b>                                                         |                |
| 1037 | .....                                                                 |                |
| 1038 | <b>Solicited AEs</b> .....                                            | <b>91</b>      |
| 1039 | <b>13.6.2</b>                                                         |                |
| 1040 | .....                                                                 |                |
| 1041 | <b>Unsolicited AEs</b> .....                                          | <b>91</b>      |
| 1042 | <b>13.6.3</b>                                                         |                |
| 1043 | .....                                                                 |                |
| 1044 | <b>Medically attended AEs</b> .....                                   | <b>91</b>      |
| 1045 | <b>13.7</b>                                                           |                |
| 1046 | .....                                                                 |                |
| 1047 | <b>Reporting Procedures for Serious Adverse Events</b> .....          | <b>91</b>      |
| 1048 | <b>13.7.1</b>                                                         |                |
| 1049 | .....                                                                 |                |
| 1050 | <b>Events exempt from immediate reporting as SAEs</b> .....           | <b>91</b>      |
| 1051 | <b>13.8</b>                                                           |                |
| 1052 | .....                                                                 |                |
| 1053 | <b>Expectedness</b> .....                                             | <b>91</b>      |
| 1054 | <b>13.8.1</b>                                                         |                |
| 1055 | .....                                                                 |                |
| 1056 | <b>SAEs</b> .....                                                     | <b>91</b>      |
| 1057 | <b>13.8.1.1</b>                                                       |                |
| 1058 | .....                                                                 |                |
| 1059 | <b>AstraZeneca COVID-19 vaccine (ChAdOx1 nCoV-19)</b> .....           | <b>92</b>      |
| 1060 | <b>13.8.1.2</b>                                                       |                |
| 1061 | .....                                                                 |                |
| 1062 | <b>Pfizer BioNTech (BNT162b2)</b> .....                               | <b>92</b>      |
| 1063 | <b>13.8.2</b>                                                         |                |
| 1064 | .....                                                                 |                |
| 1065 | <b>Foreseeable adverse reactions</b> .....                            | <b>92</b>      |
| 1066 | <b>13.8.2.1</b>                                                       |                |
| 1067 | .....                                                                 |                |
| 1068 | <b>AstraZeneca COVID-19 vaccine (ChAdOx1 nCoV-19)</b> .....           | <b>92</b>      |
| 1069 | <b>13.8.2.2</b>                                                       |                |
| 1070 | .....                                                                 |                |
| 1071 | <b>Pfizer BioNTech (BNT162b2)</b> .....                               | <b>93</b>      |



|      |                                                        |           |
|------|--------------------------------------------------------|-----------|
| 1072 | <b>13.9</b>                                            |           |
| 1073 | .....                                                  |           |
| 1074 | <b>Adverse events of special interest (AESI) .....</b> | <b>93</b> |
| 1075 | <b>13.10</b>                                           |           |
| 1076 | .....                                                  |           |
| 1077 | <b>SUSAR Reporting.....</b>                            | <b>94</b> |
| 1078 | <b>13.11</b>                                           |           |
| 1079 | .....                                                  |           |
| 1080 | <b>Development Safety Update Reports .....</b>         | <b>94</b> |
| 1081 | <b>13.12</b>                                           |           |
| 1082 | .....                                                  |           |
| 1083 | <b>Interim reviews .....</b>                           | <b>95</b> |
| 1084 | <b>13.13</b>                                           |           |
| 1085 | .....                                                  |           |
| 1086 | <b>Safety Holding Rules .....</b>                      | <b>95</b> |
| 1087 | <b>13.14</b>                                           |           |
| 1088 | .....                                                  |           |
| 1089 | <b>Contraception and pregnancy .....</b>               | <b>95</b> |
| 1090 | <b>13.14.1</b>                                         |           |
| 1091 | .....                                                  |           |
| 1092 | <b>Contraception .....</b>                             | <b>95</b> |
| 1093 | <b>13.14.2</b>                                         |           |
| 1094 | .....                                                  |           |
| 1095 | <b>Pregnancy .....</b>                                 | <b>95</b> |
| 1096 | <b>14</b>                                              |           |
| 1097 | .....                                                  |           |
| 1098 | <b>STATISTICS.....</b>                                 | <b>95</b> |
| 1099 | <b>14.1</b>                                            |           |
| 1100 | .....                                                  |           |
| 1101 | <b>Sample size .....</b>                               | <b>95</b> |
| 1102 | <b>14.2</b>                                            |           |
| 1103 | .....                                                  |           |
| 1104 | <b>Description of Statistical Methods.....</b>         | <b>96</b> |
| 1105 | <b>14.3</b>                                            |           |
| 1106 | .....                                                  |           |
| 1107 | <b>Interim analysis .....</b>                          | <b>96</b> |
| 1108 | <b>14.4</b>                                            |           |
| 1109 | .....                                                  |           |
| 1110 | <b>Missing data .....</b>                              | <b>97</b> |
| 1111 | <b>15</b>                                              |           |
| 1112 | .....                                                  |           |
| 1113 | <b>DATA MANAGEMENT.....</b>                            | <b>97</b> |
| 1114 | <b>15.1</b>                                            |           |
| 1115 | .....                                                  |           |
| 1116 | <b>Access to Data &amp; Data Protection .....</b>      | <b>97</b> |
| 1117 | <b>15.2</b>                                            |           |
| 1118 | .....                                                  |           |
| 1119 | <b>Data Recording .....</b>                            | <b>97</b> |
| 1120 | <b>15.3</b>                                            |           |
| 1121 | .....                                                  |           |
| 1122 | <b>Record keeping .....</b>                            | <b>97</b> |
| 1123 | <b>15.4</b>                                            |           |
| 1124 | .....                                                  |           |
| 1125 | <b>Source Data and Case Report Forms (CRFs) .....</b>  | <b>98</b> |
| 1126 | <b>15.5</b>                                            |           |
| 1127 | .....                                                  |           |
| 1128 | <b>Data Quality .....</b>                              | <b>98</b> |
| 1129 | <b>15.6</b>                                            |           |
| 1130 | .....                                                  |           |
| 1131 | <b>Data Sharing .....</b>                              | <b>98</b> |

|      |                                                    |            |
|------|----------------------------------------------------|------------|
| 1132 | <b>16</b>                                          |            |
| 1133 | .....                                              |            |
| 1134 | <b>QUALITY ASSURANCE PROCEDURES.....</b>           | <b>98</b>  |
| 1135 | <b>16.1</b>                                        |            |
| 1136 | .....                                              |            |
| 1137 | <b>Risk assessment.....</b>                        | <b>98</b>  |
| 1138 | <b>16.2</b>                                        |            |
| 1139 | .....                                              |            |
| 1140 | <b>Monitoring.....</b>                             | <b>98</b>  |
| 1141 | <b>16.3</b>                                        |            |
| 1142 | .....                                              |            |
| 1143 | <b>Trial committees .....</b>                      | <b>98</b>  |
| 1144 | <b>16.3.1</b>                                      |            |
| 1145 | .....                                              |            |
| 1146 | <b>Trial Steering Committee.....</b>               | <b>98</b>  |
| 1147 | <b>16.3.2</b>                                      |            |
| 1148 | .....                                              |            |
| 1149 | <b>Safety Monitoring Committee .....</b>           | <b>98</b>  |
| 1150 | <b>16.3.3</b>                                      |            |
| 1151 | .....                                              |            |
| 1152 | <b>Study Management Committee .....</b>            | <b>99</b>  |
| 1153 | <b>17</b>                                          |            |
| 1154 | .....                                              |            |
| 1155 | <b>PROTOCOL DEVIATIONS .....</b>                   | <b>99</b>  |
| 1156 | <b>18</b>                                          |            |
| 1157 | .....                                              |            |
| 1158 | <b>SERIOUS BREACHES.....</b>                       | <b>99</b>  |
| 1159 | <b>19</b>                                          |            |
| 1160 | .....                                              |            |
| 1161 | <b>ETHICAL AND REGULATORY CONSIDERATIONS .....</b> | <b>99</b>  |
| 1162 | <b>19.1</b>                                        |            |
| 1163 | .....                                              |            |
| 1164 | <b>Declaration of Helsinki.....</b>                | <b>99</b>  |
| 1165 | <b>19.2</b>                                        |            |
| 1166 | .....                                              |            |
| 1167 | <b>Guidelines for Good Clinical Practice .....</b> | <b>99</b>  |
| 1168 | <b>19.3</b>                                        |            |
| 1169 | .....                                              |            |
| 1170 | <b>Approvals .....</b>                             | <b>99</b>  |
| 1171 | <b>19.4</b>                                        |            |
| 1172 | .....                                              |            |
| 1173 | <b>Other Ethical Considerations .....</b>          | <b>99</b>  |
| 1174 | <b>19.5</b>                                        |            |
| 1175 | .....                                              |            |
| 1176 | <b>Reporting.....</b>                              | <b>99</b>  |
| 1177 | <b>19.6</b>                                        |            |
| 1178 | .....                                              |            |
| 1179 | <b>Transparency in Research .....</b>              | <b>100</b> |
| 1180 | <b>19.7</b>                                        |            |
| 1181 | .....                                              |            |
| 1182 | <b>Participant Confidentiality .....</b>           | <b>100</b> |
| 1183 | <b>19.8</b>                                        |            |
| 1184 | .....                                              |            |
| 1185 | <b>Expenses and Benefits .....</b>                 | <b>100</b> |
| 1186 | <b>20</b>                                          |            |
| 1187 | .....                                              |            |
| 1188 | <b>FINANCE AND INSURANCE.....</b>                  | <b>100</b> |
| 1189 | <b>20.1</b>                                        |            |
| 1190 | .....                                              |            |
| 1191 | <b>Funding.....</b>                                | <b>100</b> |

|      |                                                                                   |            |
|------|-----------------------------------------------------------------------------------|------------|
| 1192 | <b>20.2</b>                                                                       |            |
| 1193 | .....                                                                             |            |
| 1194 | <b>Insurance</b> .....                                                            | <b>100</b> |
| 1195 | <b>20.3</b>                                                                       |            |
| 1196 | .....                                                                             |            |
| 1197 | <b>Contractual arrangements</b> .....                                             | <b>100</b> |
| 1198 | <b>21</b>                                                                         |            |
| 1199 | .....                                                                             |            |
| 1200 | <b>PUBLICATION POLICY</b> .....                                                   | <b>100</b> |
| 1201 | <b>22</b> ..... <b>DEVELOPMENT OF A NEW PRODUCT/ PROCESS OR THE GENERATION OF</b> |            |
| 1202 | <b>INTELLECTUAL PROPERTY</b> .....                                                | <b>100</b> |
| 1203 | <b>23</b>                                                                         |            |
| 1204 | .....                                                                             |            |
| 1205 | <b>ARCHIVING</b> .....                                                            | <b>100</b> |
| 1206 | <b>24</b>                                                                         |            |
| 1207 | .....                                                                             |            |
| 1208 | <b>REFERENCES</b> .....                                                           | <b>101</b> |
| 1209 | <b>25</b>                                                                         |            |
| 1210 | .....                                                                             |            |
| 1211 | <b>APPENDIX A: SCHEDULE OF PROCEDURES</b> .....                                   | <b>103</b> |
| 1212 | <b>26</b>                                                                         |            |
| 1213 | .....                                                                             |            |
| 1214 | <b>APPENDIX B: AMENDMENT HISTORY</b> .....                                        | <b>106</b> |
| 1215 | <b>27</b>                                                                         |            |
| 1216 | .....                                                                             |            |
| 1217 | <b>APPENDIX C: Toxicity grading scale for lab AEs</b> .....                       | <b>108</b> |
| 1218 | <b>28</b>                                                                         |            |
| 1219 | .....                                                                             |            |
| 1220 | <b>APPENDIX D BLOOD SAMPLING</b> .....                                            | <b>109</b> |
| 1221 |                                                                                   |            |
| 1222 | <b>2 KEY TRIAL CONTACTS</b>                                                       |            |

|                             |                                                                                                                                                                                                                                                                                                                                     |
|-----------------------------|-------------------------------------------------------------------------------------------------------------------------------------------------------------------------------------------------------------------------------------------------------------------------------------------------------------------------------------|
| <b>Chief Investigator</b>   | Professor Matthew Snape<br>Associate Professor in General Paediatrics and Vaccinology<br>Centre for Clinical Vaccinology and Tropical Medicine (CCVTM)<br>University of Oxford<br>Churchill Hospital, Oxford OX37LE<br>United Kingdom<br><a href="mailto:matthew.snape@paediatrics.ox.ac.uk">matthew.snape@paediatrics.ox.ac.uk</a> |
| <b>Sponsor</b>              | University of Oxford<br>Clinical Trials and Research Governance, Joint Research Office<br>Boundary Brook House<br>Churchill Drive<br>Headington, Oxford OX3 7GB<br>United Kingdom<br><a href="mailto:ctr@admin.ox.ac.uk">ctr@admin.ox.ac.uk</a>                                                                                     |
| <b>Funder(s)</b>            | National Institute for Health Research & UK Vaccine Task Force                                                                                                                                                                                                                                                                      |
| <b>Clinical Trials Unit</b> | Oxford Vaccine Group,<br>University of Oxford,<br>Centre for Clinical Vaccinology and Tropical Medicine (CCVTM),<br>Churchill Hospital,<br>Oxford, OX3 7LE,<br>United Kingdom<br><a href="mailto:info@ovg.ox.ac.uk">info@ovg.ox.ac.uk</a>                                                                                           |

|                      |                                                                                                                                                                                                                                                                                                                                                                                                                                                                                                                                                                                                                                                                                                                                                                                                                                                                                                                                                                                                                                                                                                                                                                            |         |            |         |          |         |         |        |           |         |          |           |  |
|----------------------|----------------------------------------------------------------------------------------------------------------------------------------------------------------------------------------------------------------------------------------------------------------------------------------------------------------------------------------------------------------------------------------------------------------------------------------------------------------------------------------------------------------------------------------------------------------------------------------------------------------------------------------------------------------------------------------------------------------------------------------------------------------------------------------------------------------------------------------------------------------------------------------------------------------------------------------------------------------------------------------------------------------------------------------------------------------------------------------------------------------------------------------------------------------------------|---------|------------|---------|----------|---------|---------|--------|-----------|---------|----------|-----------|--|
| <b>Statisticians</b> | <p><b>Xinxue Liu</b><br/>Oxford Vaccine Group, Centre for Clinical Vaccinology and Tropical Medicine (CCVTM),<br/>University of Oxford, Churchill Hospital, Oxford, OX3 7LE,<br/><a href="mailto:xinxue.liu@paediatrics.ox.ac.uk">xinxue.liu@paediatrics.ox.ac.uk</a></p> <p><b>Nick Andrews</b><br/>Public Health England<br/>61 Colindale Ave, London NW9 5EQ<br/><a href="mailto:nick.andrews@phe.gov.uk">nick.andrews@phe.gov.uk</a></p>                                                                                                                                                                                                                                                                                                                                                                                                                                                                                                                                                                                                                                                                                                                               |         |            |         |          |         |         |        |           |         |          |           |  |
| <b>Committees</b>    | <p><b>Data Safety Monitoring Board</b><br/>David Lewis (Chair)<br/>Judith Breuer, Virologist, University College London<br/>Stephen Evans, Statistician, London School Hygiene &amp; Tropical Medicine<br/>Krishnan Bhaskaran, Statistician, London School Hygiene &amp; Tropical Medicine<br/>Ian Feavers, Senior Research Assistant, University of Oxford<br/>Paul Moss, Professor of Haematology, University of Birmingham<br/>Hanna Nohynek, Physician, Deputy Head of the Unit for Infectious Disease Control, Finland<br/>Mark Toshner, University Lecturer, University of Cambridge</p> <p><b>Trial Steering Group</b><br/>Mary Ramsay, Public Health England<br/>Robert Read, University of Southampton<br/>Paul Turner, Imperial College London<br/>Claire Cameron, Public Health Scotland</p> <p><b>Study Management Group</b></p> <table data-bbox="288 896 1085 1077"> <tr> <td>M Snape</td> <td>M Ramasamy</td> </tr> <tr> <td>P Heath</td> <td>B Hallis</td> </tr> <tr> <td>S Faust</td> <td>V Libri</td> </tr> <tr> <td>A Finn</td> <td>A Collins</td> </tr> <tr> <td>C Green</td> <td>D Turner</td> </tr> <tr> <td>R Lazarus</td> <td></td> </tr> </table> | M Snape | M Ramasamy | P Heath | B Hallis | S Faust | V Libri | A Finn | A Collins | C Green | D Turner | R Lazarus |  |
| M Snape              | M Ramasamy                                                                                                                                                                                                                                                                                                                                                                                                                                                                                                                                                                                                                                                                                                                                                                                                                                                                                                                                                                                                                                                                                                                                                                 |         |            |         |          |         |         |        |           |         |          |           |  |
| P Heath              | B Hallis                                                                                                                                                                                                                                                                                                                                                                                                                                                                                                                                                                                                                                                                                                                                                                                                                                                                                                                                                                                                                                                                                                                                                                   |         |            |         |          |         |         |        |           |         |          |           |  |
| S Faust              | V Libri                                                                                                                                                                                                                                                                                                                                                                                                                                                                                                                                                                                                                                                                                                                                                                                                                                                                                                                                                                                                                                                                                                                                                                    |         |            |         |          |         |         |        |           |         |          |           |  |
| A Finn               | A Collins                                                                                                                                                                                                                                                                                                                                                                                                                                                                                                                                                                                                                                                                                                                                                                                                                                                                                                                                                                                                                                                                                                                                                                  |         |            |         |          |         |         |        |           |         |          |           |  |
| C Green              | D Turner                                                                                                                                                                                                                                                                                                                                                                                                                                                                                                                                                                                                                                                                                                                                                                                                                                                                                                                                                                                                                                                                                                                                                                   |         |            |         |          |         |         |        |           |         |          |           |  |
| R Lazarus            |                                                                                                                                                                                                                                                                                                                                                                                                                                                                                                                                                                                                                                                                                                                                                                                                                                                                                                                                                                                                                                                                                                                                                                            |         |            |         |          |         |         |        |           |         |          |           |  |

1223  
1224  
1225  
1226  
1227

### 3 CONFLICT OF INTEREST DECLARATION

1229 The ChAdOx1 nCoV-19 vaccine was developed as a partnership between the University of Oxford, who are  
1230 sponsoring and coordinating this study, and AstraZeneca. The University of Oxford and AstraZeneca have  
1231 committed to making the vaccine available on a ‘not for profit’ basis for the duration of the current pandemic.  
1232 Both parties could potentially profit from this vaccine in the future.  
1233 M Snape is an investigator on the COV001 and COV002 studies evaluating ChAdOx1 nCoV-19, these studies  
1234 are funded by NIHR and receive logistical support from AstraZeneca. M Snape is currently, or has recently been,  
1235 an investigator on studies funded +/- sponsored by vaccine manufacturers including Pfizer, GlaxoSmithKline,  
1236 Janssen, MCM vaccines, Novavax and Medimmune. He receives no personal financial benefit for this work.

1237

### 4 LAY SUMMARY

1239 On the 2<sup>nd</sup> of December 2020 the MHRA granted emergency authorisation for a vaccine against COVID-19,  
1240 ‘COVID-19 mRNA Vaccine BNT162b2’, the European Medicines Agency then granted conditional authorisation  
1241 on 21<sup>st</sup> December 2020. This was followed by emergency authorisation of the Oxford/AstraZeneca ChAdOx1  
1242 nCoV-19 vaccine on the 29<sup>th</sup> of December 2020 by the UK MHRA. The MHRA then similarly granted  
1243 emergency authorisation for the mRNA COVID-19 Vaccine Moderna on 8<sup>th</sup> January 2021. The adjuvanted protein  
1244 COVID-19 vaccine from Novavax, NVX-CoV2373, is under rolling review of the MHRA at the time of writing.  
1245 All of these vaccines were originally developed for use as homologous two-dose regimens. There are likely to be  
1246 significant logistical challenges immunising large portions of the population. There would be significant  
1247 advantages to having flexible immunisation programmes whereby the second vaccine dose is not necessarily the  
1248 same as the first dose. Accordingly, this study will determine the safety as well as the immune responses to a  
1249 variety of combinations of prime/boost schedules for candidate COVID-19 vaccines that are potentially to be  
1250 deployed in the UK. The vaccines to be studied in this protocol will primarily be determined by those made  
1251 available to the Department of Health and Social Care (DHSC) for population use.

1252  
1253

1254  
1255  
1256  
1257  
1258  
1259  
1260  
1261  
1262  
1263  
1264  
1265  
1266  
1267  
1268  
1269  
1270  
1271  
1272  
1273  
1274  
1275  
1276  
1277  
1278  
1279  
1280  
1281  
1282  
1283  
1284  
1285  
1286

**5 SYNOPSIS**

|                                    |                                                                                                                                                                                                                                                                                                                                                                                                                                                                                                                                                                        |
|------------------------------------|------------------------------------------------------------------------------------------------------------------------------------------------------------------------------------------------------------------------------------------------------------------------------------------------------------------------------------------------------------------------------------------------------------------------------------------------------------------------------------------------------------------------------------------------------------------------|
| Trial Title                        | A single-blind, randomised, phase II UK multi-centre study to determine reactogenicity and immunogenicity of heterologous prime/boost COVID-19 vaccine schedules                                                                                                                                                                                                                                                                                                                                                                                                       |
| Internal ref. no. (or short title) | Comparing COVID-19 Vaccine Schedule Combinations (Com-COV)                                                                                                                                                                                                                                                                                                                                                                                                                                                                                                             |
| Trial registration                 | EudraCT 2020-005085-33<br>ISRCTN: 69254139                                                                                                                                                                                                                                                                                                                                                                                                                                                                                                                             |
| Sponsor                            | University of Oxford<br>Clinical Trials and Research Governance<br>Joint Research Office<br>Boundary Brook House<br>Churchill Drive<br>Headington<br>Oxford OX3 7GB<br>United Kingdom                                                                                                                                                                                                                                                                                                                                                                                  |
| Funder                             | National Institute for Health Research & UK Vaccine Task Force                                                                                                                                                                                                                                                                                                                                                                                                                                                                                                         |
| Clinical Phase                     | Phase II                                                                                                                                                                                                                                                                                                                                                                                                                                                                                                                                                               |
| Trial Design                       | Single-blind, randomised prime-boost vaccine administration study                                                                                                                                                                                                                                                                                                                                                                                                                                                                                                      |
| Trial Participants                 | Adults aged 50 years and above                                                                                                                                                                                                                                                                                                                                                                                                                                                                                                                                         |
| Sample Size                        | A total of 820 participants, consisting of an Immunology cohort receiving their booster vaccine dose after 28 days (n=100) and a General cohort (n=720). Half of the general cohort participants (n=360) will receive their booster vaccine after 28 days, and half will receive their booster vaccine after 84 days.<br>Within the immunology cohort participants will be randomised 1:1:1:1 to the following arms receiving their booster vaccine dose after 28 days: <ul style="list-style-type: none"> <li>Prime ChAdOx1 nCoV-19, Boost ChAdOx1 nCoV-19</li> </ul> |

|                                |                                                                                                                                                                                                                                                                                                                                                                                                                                                                                                                                                                                                                                                                                                                                                                                                                                                                                                                                                                                                                                                                                                                                                                                                                                                                                                                                                                                                                                                                                                                                                                                                                                                                                                |                                                              |                                                                                    |
|--------------------------------|------------------------------------------------------------------------------------------------------------------------------------------------------------------------------------------------------------------------------------------------------------------------------------------------------------------------------------------------------------------------------------------------------------------------------------------------------------------------------------------------------------------------------------------------------------------------------------------------------------------------------------------------------------------------------------------------------------------------------------------------------------------------------------------------------------------------------------------------------------------------------------------------------------------------------------------------------------------------------------------------------------------------------------------------------------------------------------------------------------------------------------------------------------------------------------------------------------------------------------------------------------------------------------------------------------------------------------------------------------------------------------------------------------------------------------------------------------------------------------------------------------------------------------------------------------------------------------------------------------------------------------------------------------------------------------------------|--------------------------------------------------------------|------------------------------------------------------------------------------------|
|                                | <ul style="list-style-type: none"> <li>• Prime ChAdOx1 nCOV-19, Boost BNT162b2</li> <li>• Prime BNT162b2, Boost BNT162b2</li> <li>• Prime BNT162b2, Boost ChAdOx1 nCOV-19</li> </ul> <p>Within the general cohort participants will be randomised 1:1:1:1:1:1:1 to the following arms:</p> <ul style="list-style-type: none"> <li>• Prime ChAdOx1 nCOV-19, Boost ChAdOx1 nCOV-19 28 day boost</li> <li>• Prime ChAdOx1 nCOV-19, Boost BNT162b2 28 day boost</li> <li>• Prime BNT162b2, Boost BNT162b2 28 day boost</li> <li>• Prime BNT162b2, Boost ChAdOx1 nCOV-19 28 day boost</li> <li>• Prime ChAdOx1 nCOV-19, Boost ChAdOx1 nCOV-19 84 day boost*</li> <li>• Prime ChAdOx1 nCOV-19, Boost BNT162b2 84 day boost*</li> <li>• Prime BNT162b2, Boost BNT162b2 84 day boost*</li> <li>• Prime BNT162b2, Boost ChAdOx1 nCOV-19 84 day boost*</li> </ul> <p>There will therefore be a sum total of 205 participants receiving each different permutation of vaccine, 25 of whom will be in the Immunology cohort with booster vaccine dose after 28 days, 90 in the General Cohort with booster vaccine dose after 28 days and 90 in the General Cohort with booster vaccine dose after 84 days.</p> <p>*Participants in each arm (N=90) of the General cohort boosted at 84 days who consent to the optional sub-study (evaluating impact of prophylactic paracetamol), will have a further randomisation and subdivision into those advised to take up to 4 doses of prophylactic paracetamol over the initial 24 hours following boost vaccination (prophylactic paracetamol, N = 45) and those advised to take paracetamol only in response to symptoms (reactive paracetamol, N = 45).</p> |                                                              |                                                                                    |
| Planned Trial Period           | 8-12 months per participant (following on from the first vaccination)<br>Total trial period 1 year, 9 months                                                                                                                                                                                                                                                                                                                                                                                                                                                                                                                                                                                                                                                                                                                                                                                                                                                                                                                                                                                                                                                                                                                                                                                                                                                                                                                                                                                                                                                                                                                                                                                   |                                                              |                                                                                    |
|                                | Objectives                                                                                                                                                                                                                                                                                                                                                                                                                                                                                                                                                                                                                                                                                                                                                                                                                                                                                                                                                                                                                                                                                                                                                                                                                                                                                                                                                                                                                                                                                                                                                                                                                                                                                     | Outcome Measures                                             | Timepoint(s)                                                                       |
| Primary                        | To determine whether the immune response in COVID seronegative participants to immunisation with heterologous prime/boost COVID-19 vaccines regimens (boosted at D28) is non-inferior to that observed following immunisation with approved homologous prime-boost regimens (boosted at D28).                                                                                                                                                                                                                                                                                                                                                                                                                                                                                                                                                                                                                                                                                                                                                                                                                                                                                                                                                                                                                                                                                                                                                                                                                                                                                                                                                                                                  | Immunogenicity: Anti-spike immunoglobulins                   | Day 56                                                                             |
| Secondary                      | To determine whether the immune response in COVID seronegative participants to immunisation with heterologous prime/boost COVID-19 vaccines regimens across all dosing intervals is non-inferior to that observed following immunisation with approved homologous prime-boost regimens                                                                                                                                                                                                                                                                                                                                                                                                                                                                                                                                                                                                                                                                                                                                                                                                                                                                                                                                                                                                                                                                                                                                                                                                                                                                                                                                                                                                         | Immunogenicity: Anti-spike immunoglobulins                   | 4 weeks post boost (D56 for 28 day boost cohort, D112 for the 84 day boost cohort) |
|                                | To assess safety of heterologous prime-boost COVID-19 vaccines                                                                                                                                                                                                                                                                                                                                                                                                                                                                                                                                                                                                                                                                                                                                                                                                                                                                                                                                                                                                                                                                                                                                                                                                                                                                                                                                                                                                                                                                                                                                                                                                                                 | Serious adverse events<br>Adverse events of special interest | Throughout the study                                                               |
|                                | Further characterisation of immunogenicity of heterologous & homologous prime/boost schedules*                                                                                                                                                                                                                                                                                                                                                                                                                                                                                                                                                                                                                                                                                                                                                                                                                                                                                                                                                                                                                                                                                                                                                                                                                                                                                                                                                                                                                                                                                                                                                                                                 | Anti-spike immunoglobulins                                   | D0, 7, 14, 28, 35, 84, 112, 182, 364                                               |
|                                |                                                                                                                                                                                                                                                                                                                                                                                                                                                                                                                                                                                                                                                                                                                                                                                                                                                                                                                                                                                                                                                                                                                                                                                                                                                                                                                                                                                                                                                                                                                                                                                                                                                                                                | Neutralising antibodies against SARS-CoV-2                   | D0, 14, 28, 56, 84, 112, 182, 364                                                  |
|                                |                                                                                                                                                                                                                                                                                                                                                                                                                                                                                                                                                                                                                                                                                                                                                                                                                                                                                                                                                                                                                                                                                                                                                                                                                                                                                                                                                                                                                                                                                                                                                                                                                                                                                                | Anti-nucleocapsid immunoglobulins                            | D0, 28, 56, 84, 182, 364                                                           |
| Pseudo neutralising antibodies | D0, 14, 28, 56, 84, 112, 182, 364                                                                                                                                                                                                                                                                                                                                                                                                                                                                                                                                                                                                                                                                                                                                                                                                                                                                                                                                                                                                                                                                                                                                                                                                                                                                                                                                                                                                                                                                                                                                                                                                                                                              |                                                              |                                                                                    |

|             |                                                                                                                                                                                                                                                                                                                                                          |                                                                                                                                                                                                                             |                                                                                                                 |
|-------------|----------------------------------------------------------------------------------------------------------------------------------------------------------------------------------------------------------------------------------------------------------------------------------------------------------------------------------------------------------|-----------------------------------------------------------------------------------------------------------------------------------------------------------------------------------------------------------------------------|-----------------------------------------------------------------------------------------------------------------|
|             |                                                                                                                                                                                                                                                                                                                                                          | Cellular immune responses by ELISpot                                                                                                                                                                                        | D0, 14, 28, 42, 56, 84, 112, 182, 364                                                                           |
|             |                                                                                                                                                                                                                                                                                                                                                          | Cellular immune responses by ICS (Th1/Th2)                                                                                                                                                                                  | D0, 14, 42                                                                                                      |
|             | <p>*D7, 14, 35 and 42 analysis only for immunology cohort (n=100)<br/> D28 analysis only for the immunology (n=100) and general cohorts boosted at 28 days (n=360)<br/> D84 analysis only for the general cohorts boosted at 84 days (n=360)<br/> D112 analysis for the general cohorts boosted at 84 days (n=360) and the immunology cohort (n=100)</p> |                                                                                                                                                                                                                             |                                                                                                                 |
|             | Reactogenicity and safety of heterologous & homologous prime/boost schedules of COVID-19 vaccines                                                                                                                                                                                                                                                        | Solicited local reactions                                                                                                                                                                                                   | 7 days after each immunisation                                                                                  |
|             |                                                                                                                                                                                                                                                                                                                                                          | Solicited systemic reactions                                                                                                                                                                                                | 7 days after each immunisation                                                                                  |
|             |                                                                                                                                                                                                                                                                                                                                                          | Unsolicited reactions                                                                                                                                                                                                       | 28 days after each immunisation                                                                                 |
|             |                                                                                                                                                                                                                                                                                                                                                          | Medically attended adverse events                                                                                                                                                                                           | Up to 3 months post booster dose                                                                                |
|             |                                                                                                                                                                                                                                                                                                                                                          | Changes from baseline in laboratory safety measures                                                                                                                                                                         | D0, 28, 35, 56, 84, 112**                                                                                       |
|             | <p>**D35 safety bloods only for immunology cohort (n=100)<br/> D28 safety bloods only for the immunology (n=100) and general cohorts boosted at 28 days (n=360)<br/> D84, 112 safety bloods only for the general cohorts boosted at 84 days (n=360)</p>                                                                                                  |                                                                                                                                                                                                                             |                                                                                                                 |
|             | Evaluation of immunogenicity, safety & reactogenicity of COVID-19 vaccines in participants sero-positive for SARS-CoV-2 IgG at baseline                                                                                                                                                                                                                  | Immunogenicity, safety & reactogenicity endpoints as outlined above                                                                                                                                                         | Timepoints as outlined above                                                                                    |
| Exploratory | To characterise COVID-19 infections experienced following administration of vaccination and the immune response to those infections                                                                                                                                                                                                                      | Anti-spike & anti-nucleocapsid immunoglobulins, neutralising and pseudo-neutralising antibodies, cellular immune response by ICS and ELISpot<br>Genome sequencing of SARS-CoV-2 viruses isolated from infected participants | From prime dose, and within 1 week of a participant being found to be SARS-CoV-2 positive by external testing   |
|             | To characterise and compare the mucosal immune response to immunisation with homologous and heterologous COVID-19 vaccines in the immunology cohort and from 100 participants in the general cohort who are boosted at 84 days using both nasal fluid samples (collected via SAM-strip) and saliva samples                                               | IgA & IgG ELISA and exploratory immunological assays                                                                                                                                                                        | D0, 7, 14, 28, 35, 42, 56, 84, 112, 182, 364<br>(Saliva sampling only from D28)                                 |
|             | To further characterise the blood antibody response in the immunology cohort and from 100 participants in the general cohort who are boosted at 84 days                                                                                                                                                                                                  | Functional antibody assays                                                                                                                                                                                                  | D0, 7, 14, 28, 35, 42, 56, 84, 112, 182, 364                                                                    |
|             | (Sub-study) To characterise the effect of advising participants to take prophylactic paracetamol on: reactogenicity, daily function and immunogenicity in the                                                                                                                                                                                            | Solicited local and systemic reactions, including questions regarding function, immunology assays                                                                                                                           | 7 days after boost immunisation for reactions and function questions. All immunology assays outlined previously |

|                             | General 84 cohort at the time of their boost                                                                                                                                                                                                                                                                                                                                 |                               |                         |         |      |                         |                                                        |                               |               |                            |               |               |
|-----------------------------|------------------------------------------------------------------------------------------------------------------------------------------------------------------------------------------------------------------------------------------------------------------------------------------------------------------------------------------------------------------------------|-------------------------------|-------------------------|---------|------|-------------------------|--------------------------------------------------------|-------------------------------|---------------|----------------------------|---------------|---------------|
| Intervention(s)<br>• IMP(s) | <table border="1"> <thead> <tr> <th>Vaccine</th> <th>Dose</th> <th>Route of administration</th> </tr> </thead> <tbody> <tr> <td>AstraZeneca COVID-19 vaccine AZD1222 (ChAdOx1 nCoV-19)</td> <td>5x10<sup>10</sup>vp (0.5ml)</td> <td>Intramuscular</td> </tr> <tr> <td>Pfizer BioNTech (BNT162b2)</td> <td>30 µg (0.3ml)</td> <td>Intramuscular</td> </tr> </tbody> </table> |                               |                         | Vaccine | Dose | Route of administration | AstraZeneca COVID-19 vaccine AZD1222 (ChAdOx1 nCoV-19) | 5x10 <sup>10</sup> vp (0.5ml) | Intramuscular | Pfizer BioNTech (BNT162b2) | 30 µg (0.3ml) | Intramuscular |
|                             | Vaccine                                                                                                                                                                                                                                                                                                                                                                      | Dose                          | Route of administration |         |      |                         |                                                        |                               |               |                            |               |               |
|                             | AstraZeneca COVID-19 vaccine AZD1222 (ChAdOx1 nCoV-19)                                                                                                                                                                                                                                                                                                                       | 5x10 <sup>10</sup> vp (0.5ml) | Intramuscular           |         |      |                         |                                                        |                               |               |                            |               |               |
| Pfizer BioNTech (BNT162b2)  | 30 µg (0.3ml)                                                                                                                                                                                                                                                                                                                                                                | Intramuscular                 |                         |         |      |                         |                                                        |                               |               |                            |               |               |

1287  
1288  
1289  
1290  
1291  
1292  
1293  
1294  
1295  
1296  
1297  
1298  
1299  
1300  
1301  
1302  
1303  
1304  
1305  
1306  
1307  
1308  
1309  
1310  
1311  
1312

## 6 ABBREVIATIONS

|                 |                                                               |
|-----------------|---------------------------------------------------------------|
| ADE             | Antibody Dependant Enhancement                                |
| AE              | Adverse event                                                 |
| AESI            | Adverse Event of Special Interest                             |
| Anti-N IgG      | Anti-nucleocapsid Immunoglobulin G                            |
| Anti-S IgG      | Anti-spike Immunoglobulin G                                   |
| AR              | Adverse reaction                                              |
| C19P            | COVID-19 Pathway                                              |
| CCVTM           | Centre for Clinical Vaccinology and Tropical Medicine, Oxford |
| ChAdOx1         | Chimpanzee adenovirus 1                                       |
| ChAdOx1 nCoV-19 | Oxford/AstraZeneca COVID-19 vaccine                           |
| CI              | Chief Investigator                                            |
| CRF             | Case Report Form                                              |



|                      |                                                      |
|----------------------|------------------------------------------------------|
| CT                   | Clinical Trials                                      |
| CTA                  | Clinical Trials Authorisation                        |
| CTRG                 | Clinical Trials and Research Governance              |
| DSMB                 | Data Safety Monitoring Board                         |
| DSUR                 | Development Safety Update Report                     |
| EDC                  | Electronic Data Capture                              |
| ELISPOT              | Enzyme-linked Immunospot                             |
| FBC                  | Full blood count                                     |
| GCP                  | Good Clinical Practice                               |
| GMT                  | Geometric Mean Titre                                 |
| GP                   | General Practitioner                                 |
| HIV                  | Human Immunodeficiency virus                         |
| HRA                  | Health Research Authority                            |
| IB                   | Investigators Brochure                               |
| ICS                  | Intracellular Cytokine Staining                      |
| ICF                  | Informed Consent Form                                |
| IM                   | Intramuscular                                        |
| IMP                  | Investigational Medicinal Product                    |
| IV                   | Intravenous                                          |
| JCVI                 | Joint Committee on Vaccines and Immunisation         |
| MHRA                 | Medicines and Healthcare products Regulatory Agency  |
| mRNA                 | Messenger ribo-nucleic-acid                          |
| NHS                  | National Health Service                              |
| NIHR                 | National Institute for Health Research               |
| NISEC                | National Immunisation Schedule Evaluation Consortium |
| Novavax, NVX-CoV2373 | Novavax COVID-19 vaccine                             |
| PBMC                 | Peripheral blood mononuclear cell                    |
| PCR                  | Polymerase chain reaction                            |
| Pfizer BNT162b2      | Pfizer COVID-19 vaccine                              |
| qPCR                 | Quantitative polymerase chain reaction               |
| RES                  | Research Ethics Service                              |
| PB                   | Post-booster                                         |
| PI                   | Principal Investigator                               |
| PIS                  | Participant/ Patient Information Sheet               |

|            |                                                |
|------------|------------------------------------------------|
| REC        | Research Ethics Committee                      |
| RSI        | Reference Safety Information                   |
| SAE        | Serious Adverse Event                          |
| SAM-strips | Synthetic absorbable matrix strips             |
| SAR        | Serious Adverse Reaction                       |
| SMPC       | Summary of Medicinal Product Characteristics   |
| SOP        | Standard Operating Procedure                   |
| SUSAR      | Suspected Unexpected Serious Adverse Reactions |
| TMF        | Trial Master File                              |
| TSG        | Trials Safety Group                            |
| µg         | Microgram                                      |
| Vp         | Viral particle                                 |
| VTF        | Vaccine Task Force                             |
| WHO        | World Health Organisation                      |

1313  
1314  
1315  
1316  
1317  
1318  
1319  
1320  
1321  
1322

## 7 BACKGROUND AND RATIONALE

1324 In December 2019, a cluster of patients with pneumonia of unknown cause was linked to a seafood wholesale  
1325 market in Wuhan, China and were later confirmed to be infected with a novel coronavirus, known as 2019-nCoV  
1326 (Zhu et al., 2020). The virus was subsequently renamed to SARS-CoV-2 because it is similar to the coronavirus  
1327 responsible for severe acute respiratory syndrome (SARS-CoV), a lineage B betacoronavirus. SARS-CoV-2  
1328 shares more than 79% of its sequence with SARS-CoV, and 50% with the coronavirus responsible for Middle  
1329 East respiratory syndrome (MERS-CoV), a member of the lineage C betacoronavirus (Lu et al., 2020). COVID-  
1330 19 is the infectious disease caused by SARS-CoV-2. By January 2020 there was increasing evidence of human to  
1331 human transmission as the number of cases rapidly began to increase in China. Despite unprecedented  
1332 containment measures adopted by the Chinese government, SARS-CoV-2 rapidly spread across the world. The  
1333 WHO declared the COVID-19 outbreak a public health emergency of international concern on 30<sup>th</sup> January 2020.  
1334 Globally, as of 25<sup>th</sup> February 2021, there have been 112,209,815 confirmed cases of COVID-19, including  
1335 2,490,776 deaths, reported to the WHO.

1336 Coronaviruses (CoVs) are spherical, enveloped, large positive-sense single-stranded RNA genomes. One-fourth  
1337 of their genome is responsible for coding structural proteins, such as the spike (S) glycoprotein, envelope (E),  
1338 membrane (M) and nucleocapsid (N) proteins. E, M, and N are mainly responsible for virion assembly whilst the  
1339 S protein is involved in receptor binding, mediating virus entry into host cells during CoVs infection via different  
1340 receptors (Li, 2016). SARS-CoV-2 belongs to the phylogenetic lineage B of the genus Betacoronavirus and it  
1341 recognises the angiotensin-converting enzyme 2 (ACE-2) as the entry receptor (Zhou et al., 2020). It is the seventh  
1342 CoV known to cause human infections and the third known to cause severe disease after SARS-CoV and MERS-  
1343 CoV.

1344 Many social measures have been undertaken in countries across the world in order to limit the spread of the  
1345 virus(UK Government Department of Health & Social Care, 2020). These have included social distancing,  
1346 lockdown and mask-wearing. Currently there is no definitive treatment for COVID-19. Dexamethasone has been  
1347 shown to improve mortality in those with confirmed disease and an Oxygen requirement (The RECOVERY

1348 Collaborative Group, 2020). Remdesivir, a direct anti-viral, has also been shown to reduce duration of symptoms  
 1349 in those who have only mild disease (Beigel et al., 2020).  
 1350 Many countries have already experienced ‘second, third waves’ of infection. On the 2<sup>nd</sup> December 2020 the  
 1351 MHRA granted emergency authorisation for a vaccine against COVID-19, ‘COVID-19 mRNA Vaccine  
 1352 BNT162b2’ (Medicines and Healthcare products Regulatory Agency, 2020), the European Medicines Agency  
 1353 then granted conditional authorisation on 21<sup>st</sup> December 2020. This was followed by emergency authorisation of  
 1354 the Oxford/AstraZeneca ChAdOx1 nCoV-19 vaccine on the 29<sup>th</sup> of December 2020 by the UK MHRA. The  
 1355 MHRA then similarly granted emergency authorisation for the mRNA COVID-19 Vaccine Moderna on 8<sup>th</sup>  
 1356 January 2021. The adjuvanted protein COVID-19 vaccine from Novavax, NVX-CoV2373, is under rolling review  
 1357 of the MHRA at the time of writing. All of these vaccines were developed for use as homologous two-dose  
 1358 regimens. Further vaccines using different platforms are expected to be approved for use against COVID-19  
 1359 during 2021. All of these are expected to be approved as two dose, homologous prime/boost schedules.  
 1360 Given the anticipated programmatic challenges of immunising large proportions of the population, there would  
 1361 be advantages to having flexible immunisation programmes where the second dose is not necessarily the same as  
 1362 the first dose, i.e. a permissive approach to using heterologous prime/boost schedules. Accordingly, this study  
 1363 will determine the reactogenicity and immunogenicity of unapproved heterologous prime/boost schedules for  
 1364 candidate COVID-19 vaccines that are potentially to be deployed in the UK, for which safety and clinical efficacy  
 1365 data are not known. The vaccines to be studied in this protocol will primarily be determined by those made  
 1366 available to the Department of Health & Social Care (DHSC) for population use.  
 1367 Furthermore, given the UK introduction of COVID-19 vaccines has utilised an extended (up to 12 week) interval  
 1368 between the first and second dose of vaccine, this study will evaluate combinations of vaccines with a 12 week,  
 1369 as well as 4 week, dosing interval.  
 1370 As further vaccines get their licensure in the UK, they can be added to the trial, increasing the number of prime-  
 1371 boost vaccine permutations. The population to be studied will be adults 50 years and over; including those with  
 1372 comorbidities classified as mild/moderate/well controlled. The reason for this is that this will most likely include  
 1373 the target population for vaccination, as these are the population who are most at risk of severe disease.

1374  
1375  
1376  
1377  
1378  
1379  
1380  
1381  
1382  
1383 **Table 1. Investigational medicinal product(s), summary of relevant studies**

| Country                | Trial    | Phase                                       | Trials registration    | Vaccine                                          | Route | Dose                                                                | Age cohorts (years) | Number of participants |
|------------------------|----------|---------------------------------------------|------------------------|--------------------------------------------------|-------|---------------------------------------------------------------------|---------------------|------------------------|
| <b>ChAdOx1 nCoV-19</b> |          |                                             |                        |                                                  |       |                                                                     |                     |                        |
| UK                     | COV001   | Phase 1/2 efficacy, safety & immunogenicity | EudraCT 2020-001072-15 | ChAdOx1 nCoV-19                                  | IM    | 5x10 <sup>10</sup> vp                                               | 18-55               | 1077                   |
| UK                     | COV002   | Phase 2/3                                   | EudraCT 2020-001228-32 | ChAdOx1 nCoV-19                                  | IM    | 2- 5x10 <sup>10</sup> vp                                            | 18-64 >65           | 10,200                 |
| Brazil                 | COV003   | Phase 3                                     | NCT04536051            | ChAdOx1 nCoV-19                                  | IM    | 5x10 <sup>10</sup> vp                                               | >18                 | 10,300                 |
| South Africa           | COV005   | Adaptive Phase 1/2                          | NCT04444674            |                                                  | IM    | 5x10 <sup>10</sup> vp                                               | 18-65               | 2,130                  |
| <b>BNT162b2</b>        |          |                                             |                        |                                                  |       |                                                                     |                     |                        |
| Germany                | BioNTech | Phase I/II, 2-Part, Dose-Escalation Trial   | EudraCT 2020-001038-36 | BNT162a 1<br>BNT162b 1<br>BNT162b 2<br>BNT162c 2 | IM    | 10 µg 30 µg<br>100 µg (phase 1)<br>10 µg, 20 µg and 30 µg (phase 2) | 18-55<br>56-85      | 486<br>132             |

|                                                                         |                         |                                                         |                               |              |    |      |                       |                        |
|-------------------------------------------------------------------------|-------------------------|---------------------------------------------------------|-------------------------------|--------------|----|------|-----------------------|------------------------|
| Argentina<br>Brazil, Germany<br>South Africa<br>Turkey<br>United States | BioNTech<br>&<br>Pfizer | A phase 1/2/3,<br>observer-blind,<br>dose-finding study | EudraCT<br>2020-002641-<br>42 | BNT162b<br>2 | IM | 30ug | 12-17<br>18-64<br>>65 | 2500<br>31000<br>10498 |
|-------------------------------------------------------------------------|-------------------------|---------------------------------------------------------|-------------------------------|--------------|----|------|-----------------------|------------------------|

1384

1385

**7.1 Potential benefits**

1386 Participants in this study receiving an approved, homologous, prime boost schedule of a COVID-19 vaccine  
1387 should have a lower risk of COVID-19 disease than unimmunised individuals. Although the heterologous  
1388 prime/boost schedules have not been tested or approved as yet, the UK ‘Green Book’ guide to immunisation notes  
1389 that, ‘as both the vaccines are based on the spike protein, it is likely the second dose will help to boost the response  
1390 to the first dose’, therefore it is expected that those in the heterologous group will receive some protection (Public  
1391 Health England, 2020). Participants may benefit from early receipt of an approved vaccine, should their age/risk  
1392 group not be eligible for routine vaccination before the start of the trial.

1393 It is hoped that the information gained from this study will contribute to the development of a safe, effective and  
1394 versatile vaccine programme against COVID-19.

1395

1396

**7.2 Potential risks**

1397

**7.2.1 Associated with phlebotomy**

1398 Localised bruising and discomfort can occur at the site of venepuncture. Infrequently fainting may occur. These  
1399 will not be documented as AEs if they occur. The total volume of blood drawn over a 12 month period will be up  
1400 to 271-528ml (+ up to 57-77ml per COVID-19 visit if required, and/or up to 7ml per additional set of safety  
1401 bloods) (blood volumes may vary slightly for participants at different investigator sites due to use of different  
1402 volume vacutainers, following local Trust SOPs). This should not compromise these otherwise healthy volunteers,  
1403 as these volumes are within the limits of 470mL every 3 – 4 months for blood donations to the National Blood  
1404 Transfusion Service. Participants will be asked to refrain from blood donation for the duration of their involvement  
1405 in the trial.

1406

1407

**7.2.2 Associated with saliva sampling**

1408 Participants may find the saliva collection process unsavoury as it involves drooling and spitting.

1409

1410

**7.2.3 Associated with nasal fluid sampling**

1411 Localised discomfort can occur in the nostril. Infrequently, this can result in a small amount of epistaxis, which  
1412 can be controlled with pressure to the affected area.

1413

1414

**7.2.4 Allergic reactions**

1415 Allergic reactions from mild to severe may occur in response to any constituent of a medicinal product’s  
1416 preparation. Anaphylaxis is extremely rare (about 1 in 1,000,000 vaccine doses) but can occur in response to any  
1417 vaccine or medication (Public Health England, 2013).

1418

1419

**7.2.5 Behaviour change**

1420 Participants might feel they can modify their COVID-19 risk behaviours on the assumption that they are protected  
1421 once vaccinated. Participants will be extensively counselled that they should continue to follow all up to date  
1422 government advice in relation to COVID-19 precautions during the trial.

1423

1424

**7.2.6 Specific risk from vaccines**

1425 Please refer to Section 13.8 for full details.

1426

1427

**7.2.7 Increased reactogenicity from heterologous prime/boost immunisation schedules**

1428 An interim analysis of participants in this study receiving immunisations at 4 week intervals suggests that  
1429 immunisation with heterologous schedules of ChAdOx1-nCoV-19 and BNT162b2 may result in more frequent  
1430 solicited systemic reactions such as fatigue, chills, feverishness and malaise than the homologous schedules for  
1431 these vaccines. Participants in the day 84 interval groups will be advised of this before receiving their boost  
1432 vaccine, and given the option of participating in a randomisation sub-study to evaluate the impact of prophylactic  
1433 paracetamol on the reactogenicity of the heterologous vaccine schedules.

1434

1435 **7.2.8 Antibody Dependant Enhancement and Immunopathology**

1436 Safety concerns around the use of some viral antigens as a vaccine antigen have been raised following historical  
1437 and limited reports of immunopathology and antibody dependant enhancement (ADE) reported in vitro and post  
1438 SARS-CoV challenge in mice, ferrets and non-human primates immunised with whole SARS-CoV inactivated or  
1439 full-length S protein based vaccines, including a study using Modified Vaccinia Ankara as a vector (Liu et al.,  
1440 2019; Tseng et al., 2012; Weingartl et al., 2004). To date, there has been one report of lung immunopathology  
1441 following MERS-CoV challenge in mice immunised with an inactivated MERS-CoV candidate vaccine (Agrawal  
1442 et al., 2016). However, in preclinical studies of ChAdOx1 immunisation and MERS-CoV challenge, no ADE was  
1443 observed in hDPP4 transgenic mice, dromedary camels or non-human primates (Alharbi et al., 2019; Munster et  
1444 al., 2017).

1445 The COVID-19 vaccines to be used in this study will have proven effectiveness, and recipients will have been  
1446 monitored for any suggestion of ADE. The possibility of ADE have also been evaluated in pre-clinical studies.  
1447 Nevertheless, this risk will not have been assessed for heterologous prime/boost schedules. Participants will be  
1448 made aware of this theoretical risk.  
1449

1450 **7.2.9 Emerging Thrombosis with Thrombocytopenia Association with vaccination**

1451 The MHRA and JCVI issued updated guidance regarding the use of ChAdOx1 nCoV-19 on 7<sup>th</sup> April 2021,  
1452 following a review of extremely rare reports of cerebral venous sinus thrombosis (and thrombosis of other major  
1453 veins) with concurrent thrombocytopenia that have occurred after vaccination in the national rollout programme.  
1454 This recommends that currently, in the UK setting, alternative vaccinations against COVID-19 should be  
1455 preferentially offered to individuals aged 29 and under.

1456 All participants in this study will be provided with up-to-date information from regulators on this finding via the  
1457 participant information sheet. They will also be provided with other relevant documentation from regulators  
1458 and/or public health authorities related to this association and possible risks of vaccination that is also being  
1459 provided in vaccination centres. Participants who will potentially receive the ChAdOx1 nCoV-19 will be given  
1460 public health documents specific to this vaccine. Participants will be advised to be aware of possible signs and  
1461 symptoms of blood clots and to have a low threshold to contact trial teams if experiencing these or other  
1462 symptoms.  
1463

1464 **7.2.10 Unwanted media attention**

1465 Trial participants can be subjected to unwanted attention from the media. They will therefore be provided with  
1466 access to a document outlining some suggested media guidance.  
1467  
1468  
1469  
1470

1471 **8 OBJECTIVES AND OUTCOME MEASURES**

| Objectives                                                                                                                                                                                                                                                                                    | Outcome Measures                                              | Timepoint(s)                                                                       |
|-----------------------------------------------------------------------------------------------------------------------------------------------------------------------------------------------------------------------------------------------------------------------------------------------|---------------------------------------------------------------|------------------------------------------------------------------------------------|
| <b>Primary</b>                                                                                                                                                                                                                                                                                |                                                               |                                                                                    |
| To determine whether the immune response in COVID seronegative participants to immunisation with heterologous prime/boost COVID-19 vaccines regimens (boosted at D28) is non-inferior to that observed following immunisation with approved homologous prime-boost regimens (boosted at D28). | Anti-spike immunoglobulins                                    | Day 56                                                                             |
| <b>Secondary</b>                                                                                                                                                                                                                                                                              |                                                               |                                                                                    |
| To assess safety of heterologous prime-boost COVID-19 vaccines                                                                                                                                                                                                                                | Serious adverse events and adverse events of special interest | Throughout the study                                                               |
| To determine whether the immune response in COVID seronegative participants to immunisation with heterologous prime/boost COVID-19                                                                                                                                                            | Immunogenicity: Anti-spike immunoglobulins                    | 4 weeks post boost (D56 for 28 day boost cohort, D112 for the 84 day boost cohort) |

|                                                                                                                                                                                                                                                                                                                                        |                                                                       |                                       |
|----------------------------------------------------------------------------------------------------------------------------------------------------------------------------------------------------------------------------------------------------------------------------------------------------------------------------------------|-----------------------------------------------------------------------|---------------------------------------|
| vaccines regimens across all dosing intervals is non-inferior to that observed following immunisation with approved homologous prime-boost regimens                                                                                                                                                                                    |                                                                       |                                       |
| Further characterisation of immunogenicity of heterologous & homologous prime/boost schedules*                                                                                                                                                                                                                                         | Anti-spike immunoglobulins                                            | D0, 7, 14, 28, 35, 84, 112, 182, 364  |
|                                                                                                                                                                                                                                                                                                                                        | Neutralising antibodies against SARS-CoV-2                            | D0, 14, 28, 56, 84, 112, 182, 364     |
|                                                                                                                                                                                                                                                                                                                                        | Anti-nucleocapsid immunoglobulins                                     | D0, 14, 28, 56, 84, 182, 364          |
|                                                                                                                                                                                                                                                                                                                                        | Pseudo neutralising antibodies                                        | D0, 14, 28, 56, 84, 112, 182, 364     |
|                                                                                                                                                                                                                                                                                                                                        | Cellular immune responses by ELISpot                                  | D0, 14, 28, 42, 56, 84, 112, 182, 364 |
|                                                                                                                                                                                                                                                                                                                                        | Cellular immune responses by ICS (Th1/Th2)                            | D0, 14, 42                            |
| **D7, 14, 35 and 42 analysis only for immunology cohort (n=100)<br>D28 analysis only for the immunology (n=100) and general cohorts boosted at 28 days (n=360)<br>D84 analysis only for the general cohorts boosted at 84 days (n=360)<br>D112 analysis only for the immunology (n=100) and general cohorts boosted at 84 days (n=360) |                                                                       |                                       |
| Reactogenicity and safety of heterologous & homologous prime/boost schedules of COVID-19 vaccines                                                                                                                                                                                                                                      | Solicited local reactions                                             | 7 days after each immunisation        |
|                                                                                                                                                                                                                                                                                                                                        | Solicited systemic reactions                                          | 7 days after each immunisation        |
|                                                                                                                                                                                                                                                                                                                                        | Unsolicited reactions                                                 | 28 days after each immunisation       |
|                                                                                                                                                                                                                                                                                                                                        | Medically attended adverse reactions                                  | Up to 3 months post booster           |
|                                                                                                                                                                                                                                                                                                                                        | Changes from baseline in laboratory safety measures                   | D0, 28, 35, 56, 84, 112**             |
| **D35 safety bloods only for immunology cohort (n=100)<br>D28 safety bloods only for the immunology (n=100) and general cohorts boosted at 28 days (n=360)<br>D84, 112 safety bloods only for the general cohorts boosted at 84 days (n=360)                                                                                           |                                                                       |                                       |
| Evaluation of immunogenicity, safety and reactogenicity of COVID-19 vaccines in participants sero-positive for SARS-CoV-2 IgG at baseline                                                                                                                                                                                              | Immunogenicity, reactogenicity and safety endpoints as outlined above | Timepoints as outlined above          |

|                                                                                                                                                                                                                                                                                                             |                                                                                                                                                                                                                               |                                                                                                                 |
|-------------------------------------------------------------------------------------------------------------------------------------------------------------------------------------------------------------------------------------------------------------------------------------------------------------|-------------------------------------------------------------------------------------------------------------------------------------------------------------------------------------------------------------------------------|-----------------------------------------------------------------------------------------------------------------|
| To characterise COVID-19 infections experienced following administration of vaccination and the immune response to those infections                                                                                                                                                                         | Anti-spike & anti-nucleocapsid immunoglobulins, neutralising and pseudo-neutralising antibodies, cellular immune response by ICS and ELISpot<br>Genome sequencing of SARS-CoV-2 viruses isolated from infected participants   | From prime dose, and within 1 week of a participant being found to be SARS-CoV-2 positive by external testing   |
| <b>Exploratory</b>                                                                                                                                                                                                                                                                                          |                                                                                                                                                                                                                               |                                                                                                                 |
| To characterise COVID-19 infections experienced following completion of immunisation schedule and the immune response to those infections                                                                                                                                                                   | Anti-spike and anti-nucleocapsid immunoglobulins, neutralising and pseudo-neutralising antibodies, cellular immune response by ICS and ELISpot<br>Genome sequencing of SARS-CoV-2 viruses isolated from infected participants | From post-boost and within 1 week of a participant being found to be SARS-CoV-2 positive by external testing.   |
| To characterise and compare the mucosal immune response to immunisation with homologous and heterologous COVID-19 vaccines in the immunology cohort and from 100 participants in the general cohort who are boosted at 84 days, using both nasal fluid (collected via SAM-strips) as well as saliva samples | IgA & IgG ELISA and exploratory immunological assays                                                                                                                                                                          | D0, 7, 14, 28, 35, 42, 56, 84, 112, 182, 364<br>(Saliva samples only from D28)                                  |
| To further characterise the blood antibody response in the immunology cohort and from 100 participants in the general cohort who are boosted at 84 days                                                                                                                                                     | Functional antibody assays                                                                                                                                                                                                    | D0, 7, 14, 28, 35, 42, 56, 84, 112, 182, 364                                                                    |
| (Sub-study) To characterise the effect of advising participants to take prophylactic paracetamol on: reactogenicity, daily function and immunogenicity in the General 84 cohort at the time of their boost                                                                                                  | Solicited local and systemic reactions, including questions regarding function, immunology assays                                                                                                                             | 7 days after boost immunisation for reactions and function questions. All immunology assays outlined previously |

1472 **9 TRIAL DESIGN**1473 A single-blind, randomised, phase II UK multi-centre study to determine reactogenicity and immunogenicity of  
1474 heterologous prime/boost COVID-19 vaccine schedules.

1475

1476 **9.1 Setting**

1477 Multicentre study conducted through academic and NHS clinical trials sites.

1478

1479 **9.2 Trial duration**1480 Total duration of each participant will be 8-12 months from the administration of the first vaccine dose. The total  
1481 trial period will be approximately 1 year, 9 months

1482

1483 **9.3 Study groups**1484 The study will initially consist of 2 cohorts, one for more detailed immunological assessment (immunology cohort,  
1485 n=100, 25 per arm) boosted at Day 28 (randomised 1:1:1:1), one for main immunology endpoints for participants  
1486 boosted at Day 28 and at Day 84 (general cohort n=720, 90 per arm) (randomised 1:1:1:1:1:1:1)

1487 The study will be single-blind.

1488

| Cohort             | Group               | Arm        | Prime (Day 0)   | Boost (Day 28)  | Boost (Day 84) | Visits        |
|--------------------|---------------------|------------|-----------------|-----------------|----------------|---------------|
| Immunology (n=100) | A - ChAdOx1 nCOV-19 | IA1 (n=25) | ChAdOx1 nCOV-19 | ChAdOx1 nCOV-19 | -              | Day 0, 7, 14, |

|                 |                             |               |                 |                 |                 |                              |
|-----------------|-----------------------------|---------------|-----------------|-----------------|-----------------|------------------------------|
|                 | (n=50)                      | IA2 (n=25)    | ChAdOx1 nCOV-19 | BNT162b2        | -               | 28, 35, 42, 56, 182, 364     |
|                 | B - BNT162b2 (n=50)         | IB1 (n=25)    | BNT162b2        | BNT162b2        | -               |                              |
|                 |                             | IB2 (n=25)    | BNT162b2        | ChAdOx1 nCOV-19 | -               |                              |
| General (n=720) | A - ChAdOx1 nCOV-19 (n=180) | GA1-28 (n=90) | ChAdOx1 nCOV-19 | ChAdOx1 nCOV-19 | -               | Day 0, 28, 56, 182, 364      |
|                 |                             | GA2-28 (n=90) | ChAdOx1 nCOV-19 | BNT162b2        | -               |                              |
|                 | B - BNT162b2 (n=180)        | GB1-28 (n=90) | BNT162b2        | BNT162b2        | -               |                              |
|                 |                             | GB2-28 (n=90) | BNT162b2        | ChAdOx1 nCOV-19 | -               |                              |
|                 | A - ChAdOx1 nCOV-19 (n=180) | GA1-84 (n=90) | ChAdOx1 nCOV-19 | -               | ChAdOx1 nCOV-19 | Day 0, 56, 84, 112, 182, 364 |
|                 |                             | GA2-84 (n=90) | ChAdOx1 nCOV-19 | -               | BNT162b2        |                              |
|                 | B - BNT162b2 (n=180)        | GB1-84 (n=90) | BNT162b2        | -               | BNT162b2        |                              |
|                 |                             | GB2-84 (n=90) | BNT162b2        | -               | ChAdOx1 nCOV-19 |                              |

1489

1490 The initial randomisation will be stratified by the study cohorts, i.e. immunology cohort and general cohort, and  
1491 by study sites:

1492 Immunology cohort (boosted 28 days) will have visits: 0, 7, 14, 28, 35, 42, 56, 112 (optional), 182, 364

1493 General cohort (boosted 28 days) will have visits: 0, 28, 56, 182, 364

1494 General cohort (boosted 84 days) will have visits: 0, 56, 84, 112, 182, 364

1495 The study will be single-blind, i.e. while staff involved in study delivery will be aware of what vaccine schedule  
1496 the participant is receiving, the participant themselves will remain blinded to their vaccine schedule (they will be  
1497 informed their timing for boost). This blind will be maintained by applying a masking tape over the vaccine  
1498 syringe. Laboratory staff will also be blinded to the vaccine schedule received.

1499 Participants who acquire new infection with SARS-CoV-2 will have an additional study visit for clinical  
1500 assessment, to take blood tests for immunological assessment and to take a sample for isolation of virus. They  
1501 may also have nasal fluid and saliva samples taken.

1502 Of note is that the interval between the BNT162b2 vaccines will be 28 days or 84 days. This is consistent with  
1503 this vaccine's Summary of Product Characteristics, which specifies that the interval be 'at least 21 days'. For the  
1504 shorter interval, the 28 day interval (rather than 21 day) has been chosen to ensure that participants remain blinded  
1505 to the vaccines received, given the minimum interval for the ChAdOx1 nCoV-19 vaccine is 28 days.

1506 On 10<sup>th</sup> February 2021 the WHO issued revised recommendations that the AstraZeneca/Oxford ChAdOx1-nCoV-  
1507 19 vaccine be given at an 8-12 week boost interval in light of evidence that suggests longer prime-boost intervals  
1508 may provide superior efficacy. However, the 4 week interval schedule for the homologous AstraZeneca/Oxford  
1509 ChAdOx1-nCoV-19 vaccine is still an approved schedule and will continue to be used in this trial to maintain the  
1510 scientific integrity of the study.

1511 There will be a subsequent optional second unblinded randomisation of participants in the General cohort boosted  
1512 at 84 days to be advised to take paracetamol routinely (prophylactically) for up to 4 doses in the first 24 hours  
1513 following boost dose of vaccination and taken reactively afterwards vs advice to take paracetamol reactively only.

1514 Details of self-medication will be self-reported by e-diary

1515

| Cohort                                   | Group                       | Arm           | Prime (Day 0)   | Boost (Day 84)  | Paracetamol  | Visits                       |
|------------------------------------------|-----------------------------|---------------|-----------------|-----------------|--------------|------------------------------|
| General cohort boosted at Day 84 (n=360) | A - ChAdOx1 nCOV-19 (n=180) | GA1-84 (n=45) | ChAdOx1 nCOV-19 | ChAdOx1 nCOV-19 | Prophylactic | Day 0, 56, 84, 112, 182, 364 |
|                                          |                             | GA1-84 (n=45) | ChAdOx1 nCOV-19 | ChAdOx1 nCOV-19 | Reactive     |                              |
|                                          |                             | GA2-84 (n=45) | ChAdOx1 nCOV-19 | BNT162b2        | Prophylactic |                              |
|                                          |                             | GA2-84 (n=45) | ChAdOx1 nCOV-19 | BNT162b2        | Reactive     |                              |
|                                          | B - BNT162b2 (n=180)        | GB1-84 (n=45) | BNT162b2        | BNT162b2        | Prophylactic |                              |
|                                          |                             | GB1-84 (n=45) | BNT162b2        | BNT162b2        | Reactive     |                              |



|  |  |               |          |                 |              |
|--|--|---------------|----------|-----------------|--------------|
|  |  | GB2-84 (n=45) | BNT162b2 | ChAdOx1 nCOV-19 | Prophylactic |
|  |  | GB2-84 (n=45) | BNT162b2 | ChAdOx1 nCOV-19 | Reactive     |

1516

1517 APPENDIX A: SCHEDULE OF PROCEDURES for full details of visit schedule.

1518

1519 **10 PARTICIPANT IDENTIFICATION**1520 **10.1 Trial Participants**

1521 Adult volunteers aged at least 50 years. Comorbidities of clinical definition mild/moderate/well-controlled will  
 1522 be permitted. Individuals of all ethnicities will be recruited, with recruitment of those identifying as Black, Asian  
 1523 and Minority Ethnic particularly encouraged.

1524

1525 **10.2 Inclusion Criteria**

- 1526 • Participant is willing and able to give written informed consent for participation in the trial
- 1527 • Male or Female, aged 50 years or above and in good health as determined by a trial clinician Participants  
 1528 may have well controlled or mild-moderate comorbidity
- 1529 • Female participants of childbearing potential must be willing to ensure that they or their partner use  
 1530 effective contraception from 1 month prior to first immunisation continuously until 3 months after boost  
 1531 immunisation. See Section 13.14 for definition of child bearing potential
- 1532 • In the Investigator's opinion, is able and willing to comply with all trial requirements
- 1533 • Willing to allow their General Practitioner and consultant, if appropriate, to be notified of participation  
 1534 in the trial
- 1535 • Willing to allow investigators to discuss the volunteer's medical history with their General Practitioner  
 1536 and access all medical records when relevant to study procedures
- 1537 • Agreement to refrain from blood donation during the course of the study

1538

1539 **10.3 Exclusion Criteria**

- 1540 • The participant may not enter the trial if ANY of the following apply:
- 1541 • Receipt of any vaccine (licensed or investigational) other than the study intervention within 30 days  
 1542 before and after each study vaccination (one week for licensed seasonal influenza vaccine or  
 1543 pneumococcal vaccine)
- 1544 • Prior or planned receipt of an investigational or licensed vaccine or product likely to impact on  
 1545 interpretation of the trial data (e.g. Adenovirus vectored vaccines, any coronavirus vaccines)
- 1546 • Administration of immunoglobulins and/or any blood products within the three months preceding the  
 1547 planned administration of the vaccines
- 1548 • Any confirmed or suspected immunosuppressive or immunodeficient state; asplenia; recurrent severe  
 1549 infections and use of immunosuppressant medication within the past 6 months, except topical steroids or  
 1550 short-term oral steroids (course lasting  $\leq 14$  days)
- 1551 • History of allergic disease or reactions likely to be exacerbated by any component of study vaccines (e.g.  
 1552 hypersensitivity to the active substance or any of the SmPC-listed ingredients of the Pfizer vaccine)
- 1553 • Any history of anaphylaxis
- 1554 • Pregnancy, lactation or willingness/intention to become pregnant within 3 months post boost vaccine
- 1555 • Current diagnosis of or treatment for cancer (except basal cell carcinoma of the skin and cervical  
 1556 carcinoma in situ)
- 1557 • Bleeding disorder (e.g. factor deficiency, coagulopathy or platelet disorder), or prior history of significant  
 1558 bleeding or bruising following IM injections or venepuncture
- 1559 • Continuous use of anticoagulants, such as coumarins and related anticoagulants (i.e. warfarin) or novel  
 1560 oral anticoagulants (i.e. apixaban, rivaroxaban, dabigatran and edoxaban)
- 1561 • Suspected or known current alcohol or drug dependency
- 1562 • Any other significant disease, disorder or finding which may significantly increase the risk to the  
 1563 volunteer because of participation in the study, affect the ability of the volunteer to participate in the  
 1564 study or impair interpretation of the study data
- 1565 • Severe and/or uncontrolled cardiovascular disease, respiratory disease, gastrointestinal disease, liver  
 1566 disease, renal disease, endocrine disorder and neurological illness (mild/moderate well controlled  
 1567 comorbidities are allowed)
- 1568 • History of active or previous auto-immune neurological disorders (e.g. multiple sclerosis, Guillain-Barre  
 1569 syndrome, transverse myelitis). Bell's palsy will not be an exclusion criterion

- 1570 • History of laboratory confirmed COVID-19 prior to enrolment (history of SARS-CoV-2 detection by
- 1571 PCR or antibody to SARS-CoV-2)
- 1572 • Significant renal or hepatic impairment
- 1573 • Scheduled elective surgery during the trial
- 1574 • Participant with life expectancy of less than 6 months
- 1575 • Participants who have participated in another research trial involving an investigational product in the
- 1576 past 12 weeks
- 1577 • Insufficient level of English language to undertake all study requirements in opinion of the Investigators
- 1578

#### 1579 **10.3.1 Sub-study (Paracetamol) Exclusion criteria**

- 1580 • History of allergic disease or reactions likely to be exacerbated by paracetamol
- 1581 • Already taking regular paracetamol for another reason
- 1582

#### 1583 **10.3.2 Temporary exclusion criteria**

1584 If at Visit 1 Screening & Vaccination the volunteer has any of the following, they will not be enrolled that day.

- 1585 • Acute respiratory illness (moderate or severe illness with or without fever)
- 1586 • Fever (oral temperature greater than 37.8°C)

1587 They may be considered for enrolment later in the trial; if they recover in sufficient time.

### 1588 **11 TRIAL PROCEDURES**

1590 See APPENDIX A: SCHEDULE OF PROCEDURES for details

#### 1591 **11.1 Recruitment**

##### 1592 **11.1.1 Identification of volunteers**

1593 Volunteers will be recruited by methods that may include use of an advertisement +/- registration form formally

1594 approved by the ethics committee(s) and distributed or posted by means such as:

- 1596 • In public places, including buses and trains, with the agreement of the owner / proprietor
- 1597 • In newspapers or other literature for circulation
- 1598 • On radio via announcements
- 1599 • On a website or social media site operated by our group or with the agreement of the owner or operator
- 1600 (including on-line recruitment through our website)
- 1601 • By e-mail distribution to a group or list only with the express agreement of the network administrator or
- 1602 with equivalent authorisation
- 1603 • By email distribution to individuals who have already given consent to be contacted for any clinical trial
- 1604 at the Oxford Vaccine Centre and at trial sites
- 1605 • Direct mail-out: This will involve obtaining names and addresses of adults via the most recent Electoral
- 1606 Roll. The contact details of individuals who have indicated that they do not wish to receive postal mail-
- 1607 shots would be removed prior to the investigators being given this information. The company providing
- 1608 this service is registered under the General Data Protection Regulation 2016/679. Investigators would
- 1609 not be given dates of birth or ages of individuals but the list supplied would only contain names of those
- 1610 aged  $\geq 50$  years (as per the inclusion criteria)
- 1611 • Direct mail-out using National Health Service databases: These include the National Health Applications
- 1612 and Infrastructure Services (NHAIS) via a NHAIS data extract or equivalent. Initial contact to potential
- 1613 participants will not be made by the study team. Instead, study invitation material will be sent out on our
- 1614 behalf by an external company, CFH Docmail Ltd, in order to preserve the confidentiality of potential
- 1615 participants. CFH Docmail Ltd is accredited as having exceeded standards under the NHS Digital Data
- 1616 Security and Protection Toolkit (ODS ID – 8HN70)
- 1617 • Oxford Vaccine Centre databases and study site databases: We may contact individuals from databases
- 1618 of groups within the CCVTM (including the Oxford Vaccine Centre database) and other study sites of
- 1619 previous trial participants who have expressed an interest in receiving information about all future studies
- 1620 for which they may be eligible
- 1621 • Using local GP practices or Trusts as Participant Identification Centres (PICs)
- 1622 • The NIHR COVID-19 vaccine volunteer database
- 1623

## 11.2 Screening and Eligibility Assessment

### 11.2.1 Initial screening

Once participants express an interest in joining the trial, they will be directed to a 2 stage online screening process. The first stage will assess for obvious exclusion criteria. If they pass this stage they will be asked to indicate their electronic consent to cover:

1. Reporting their medical history (stage 2)
2. Telephone screening visits to review their medical history (if required). Requirement to be determined by review of responses to Part 2 of online questionnaire)
3. Permission to contact the participant's GP for further clarification of past medical history, should this be clinically indicated

Participants without a past medical history or drug history that requires further review may be invited directly to enrolment/vaccination visits.

### 11.2.2 Telephone screening visit(s)

Participants for whom further clarification of eligibility is required, may be invited for telephone screening visit(s), which would then be completed by member(s) of the clinical team, based on the assessment of the part 2 responses. This will be recorded in a screening CRF. This will reduce the amount of time participants have with the clinical team during their screening procedures, should they progress to Visit 1.

We may also contact the subject's general practitioner with the permission of the volunteer. GPs will be notified at the time of enrolment (vaccination) that the subject is taking part in the study.

The interval between the last screening process (whether on-line or by telephone screening) and V1 may be up to a maximum of 120 days. Volunteers will be asked to contact the study team in the interim if there are significant changes to their health status during this time

### 11.2.3 Screening during Visit 1

The final eligibility assessment and D0 vaccination visit will be combined into Visit 1 (V1). See Section 11.6.

## 11.3 Informed Consent

The participant will personally sign and date the latest approved version of the Informed Consent form. A written version and verbal explanation of the Study Information leaflet and Informed Consent will be presented to the participant of the participant detailing:

- The exact nature of the study
- What it will involve for the participant
- The implications and constraints of the protocol
- The known side effects and any risks involved in taking part
- The sample handling protocol – participants will be informed that anonymised samples taken during the study may be shared with study collaborators
- That individual results will not be shared with participants, with the exception of their enrolment COVID-19 antibody test. This would be done at the end of the study, if requested by the participant

The Study Information leaflet will be made available to the participant for an appropriate amount of time (where possible this will be a minimum of 24 hours) prior to consent being obtained. A video presentation of the Study Information leaflet may be screened to an audience, or made available for them to access it remotely. However, participants will have the opportunity to individually question an appropriately trained and delegated researcher before signing consent.

The following general principles will be emphasised:

- Participation in the study is entirely voluntary
- Refusal to participate involves no penalty or loss of medical benefits
- The participant may withdraw from the study at any time
- The participant is free to ask questions at any time to allow him or her to understand the purpose of the study and the procedures involved
- That participant will not be sure whether they have received an approved COVID-19 vaccine schedule. This may have implications for any travel or other activities that may require individuals to be considered 'fully immunised'. Currently the 'Green Book' immunisation guidelines indicate that receipt of two 'spike protein' based vaccines (even if different vaccines) would mean no further vaccines doses are required. This potential downside to study participation will be minimised by expedited analysis of blood samples for the primary endpoint to conduct the non-inferiority analysis, as well as expedited secondary analyses to include participants boosted at 84 days.

Participants, like the general population, will not be exempt from following the contemporaneous government COVID-19 guidance to minimise viral transmission

- 1683
- 1684
- 1685
- 1686
- Samples taken as part of the study may be sent outside of the UK and Europe to laboratories in collaboration with the University of Oxford. These will be de-identified. Volunteers will be asked if they consent to indefinite storage of any leftover samples for use in other ethically approved research, this will be optional

1687 The participant will be allowed as much time as they wish to consider the information, and the opportunity to question the Investigator, their GP or other independent parties to decide whether they will participate in the study. Written informed consent will then be obtained by means of the participant dated signature, and dated signature of the person who presented and obtained the informed consent. The person who obtained the consent must be suitably qualified and experienced, and have been authorised to do so by the Chief/Principal Investigator and listed on the delegation log. A copy of the signed informed consent will be given to the participant. The original signed form will be retained at the research study site, in the CRF.

1694 Updated information that require participants to be re-consented will be sent to participants and written re-consent requested at the earliest scheduled visit. If the earliest visit to occur is in the COVID-19 Pathway (C-19P), the participant may re-consent using an electronic signature for infection control purposes. Where appropriate, and when re-consenting in person is not possible (e.g. participants in self-isolation), participants may be contacted over the phone and an appropriately trained and delegated researcher will obtain re-consent. In this instance the participant will sign the form (electronic or paper) and a copy will be signed by the researcher. The dates of signature may be different, and a copy containing both signatures will be provided to the participant at the next scheduled visit.

1701

1702

1703

## 11.4 Randomisation

1704

### 11.4.1 Randomisation to vaccine schedules

1705

1706

1707

1708

1709

1710

1711

1712

Computer generated randomisation list will be prepared by the study statistician. Participants will be randomised 1:1:1:1 within the immunology cohort to ChAdOx1 nCoV-19 homologous, ChAdOx1 nCoV-19 heterologous, BNT162b2 homologous and BNT162b2 heterologous groups, using block randomisation. Participants will be randomised 1:1:1:1:1:1:1:1 within the general cohort to ChAdOx1 nCoV-19 homologous, ChAdOx1 nCoV-19 heterologous, BNT162b2 homologous and BNT162b2 heterologous groups at boosting intervals of 28 and 84 days, using block randomisation. A block size of 8 will be used in the general cohort and a block size of 4 will be used in the immunology cohort. The randomisation will be stratified by the study sites.

1713

### 11.4.2 Randomisation to paracetamol use

1714

1715

1716

1717

1718

A computer generated randomisation list will be prepared by the study statistician. Sub-study participants will be randomised 1:1 within the general cohort boosted at 84 days, at the time of boost visit, to be advised to take prophylactic paracetamol vs reactive paracetamol, using block randomisation. Random block sizes of 2 or 4 will be used. The randomisation will be stratified by study site and vaccine schedule

1719

## 11.5 Blinding and code-breaking

1720

1721

1722

1723

1724

1725

1726

1727

1728

1729

1730

1731

1732

1733

1734

1735

1736

1737

The study will be single-blind. Staff involved in study delivery will be aware of which vaccine the participant is receiving (arm allocation); the participant themselves will remain blinded to their vaccine allocation. Vaccines will be prepared out of sight of the participant and the blind will be maintained by applying a masking tape over the vaccine syringe. Laboratory staff will also be blinded to the vaccine schedule received. The sub-study on the impact of prophylactic paracetamol use will be open-label.

If the clinical condition of a participant necessitates unblinding of the participant, this will be undertaken according to a trial specific working instruction and group allocation sent to the attending physician. This will be done if unblinding is thought to be relevant and likely to change clinical management.

In order not to disadvantage participants in a rapidly changing landscape of rules affecting national and international travel as well as event attendance, we will make every effort to liaise with appropriate parties to ensure participants' vaccination status is recorded in the most suitable manner. Should there still be the potential for disadvantage to participants that can be mitigated by unblinding then, after discussion with the Trial Steering Committee, a mass unblinding of all participants may be initiated to occur not sooner than after the last participant belonging to the day 84 boost cohort, and who is boosted within window, is 28 days post second vaccination. This will still allow reporting of adverse events within the 28-day post immunisation reporting window to occur without participant's knowledge of which vaccines they had received, thus protecting integrity of these data. Laboratory staff will remain blinded to vaccines received.

1738

## 11.6 Visits

1739

1740

1741

The study visits and procedures will be undertaken by one of the clinical trials team. The procedures to be included in each visit are documented in the schedule of attendances (see APPENDIX A: SCHEDULE OF PROCEDURES). Each visit is assigned a time-point and a window period, within which the visit will be

1742 conducted. If a participant cannot attend a visit, where possible, this will be re-arranged to an in-person visit within  
1743 the time window. A telephone visit may be conducted instead of the in-person visit to ascertain as much relevant  
1744 information as possible if the participant is unable to attend a visit in person because of quarantine or self-isolation  
1745 restrictions and the participant will be out of window if the visit is postponed.  
1746

### 11.6.1 Visit 1 (D0): Final eligibility check, Enrolment and Vaccination visit

#### 11.6.1.1 Informed consent

1747 The participant will have informed consent taken as described in Section 11.3, before proceeding to the final  
1748 eligibility check Component of V1. A video presentation of the aims of the study and all tests to be carried out  
1749 may be screened to an audience or accessed remotely before informed consent is taken. Individually, each  
1750 volunteer will have the opportunity to question an appropriately trained and delegated researcher before signing  
1751 the consent.  
1752  
1753  
1754

#### 11.6.1.2 Final Eligibility Check V1

1755 During the final eligibility check component of Visit 1 (V1):

1756 If written consent is obtained, the procedures indicated in the schedule of attendances will be undertaken  
1757 including:  
1758

- 1759 • Confirmation of medical history
- 1760 • Physical examination (if required)
- 1761 • Height and weight
- 1762 • Blood tests including:
  - 1763 ○ COVID-19 immunogenicity bloods
  - 1764 ○ Baseline bloods for safety monitoring (routine haematology & biochemistry tests)
- 1765 • Nasal fluid sample
- 1766 • Observations (temperature, heart rate, respiratory rate, blood pressure and oxygen saturation)
- 1767 • Urine pregnancy test in females of childbearing potential

1768 The eligibility of the volunteer will be reviewed by a suitable member of the clinical team. Decisions to exclude  
1769 the volunteer from enrolling in the trial or to withdraw a volunteer from the trial will be at the discretion of the  
1770 Investigator. Note that the blood tests results from this visit will not ordinarily be available at the time the decision  
1771 to proceed to immunisation with these approved vaccines is made. Instead, these blood tests will act as a baseline  
1772 assessment for any subsequent derangements of laboratory measures. Abnormal clinical findings from blood tests  
1773 at screening will be assessed by a medically qualified study member. Where available, these may be compared to  
1774 blood test results taken prior to the trial as part of the participant's normal medical care, to ascertain if the  
1775 derangement is an acute abnormality or is a chronic change. Abnormal blood tests following screening will be  
1776 assessed according to site-specific laboratory adverse event grading tables. Any abnormal test result deemed  
1777 clinically significant may be repeated to ensure it is not a single occurrence. If an abnormal finding is deemed to  
1778 be clinically significant, the volunteer will be informed and appropriate medical care arranged with the permission  
1779 of the volunteer.

1780 As per Section 10.3.1 "Temporary exclusion criteria": If a volunteer has an acute respiratory illness (moderate or  
1781 severe illness with/without fever) or a fever (oral temperature > 37.8°C) at Visit 1 Screening, the volunteer will  
1782 not be enrolled that day, but may be considered for enrolment if they recover in sufficient time.  
1783

#### 11.6.1.3 Vaccination at V1

1784 Volunteers will be considered enrolled to the trial at the point of consent. All vaccines will be administered  
1785 intramuscularly according to specific SOPs. The participant will stay in the trial site for observation for at least  
1786 15 minutes, in case of immediate adverse events. Photographs of vaccination sites may be taken, if required (with  
1787 the participants' written, informed consent) and will not include the participants' face. Photographs will be  
1788 identified by date, trial code and subject's unique identifier. Participants will be given a COVID-19 vaccination  
1789 record card (the same as that used in the national vaccination program). This will not record the type or batch  
1790 number of vaccine(s) received but will state "COVID-19 vaccine", "Com-COV Trial" and the date.  
1791  
1792

#### 11.6.1.4 Diary cards

1793 Participants will be given an oral thermometer, tape measure and diary card (electronic, but for those who are  
1794 unable to use electronic diary cards, a paper version will be made available), with instructions on use. All  
1795 participants will be given the emergency 24 hour telephone number to contact the on-call study physician if  
1796 needed. Participants will be instructed on how to self-assess the severity of these AEs. There will also be space  
1797 on the diary card to self-document unsolicited AEs, and whether medication was taken to relieve the symptoms.  
1798 There will also be a separate e-diary to log any medically attended AEs up until 3 months post booster dose (any  
1799 medical conditions for which a doctor/dentist is seen outside of routine, planned follow-up), and any serious  
1800

1801 medical illnesses or hospital visits may have occurred over the entire course of the study. Participants will be  
 1802 asked to report on solicited AEs for 7 days (and longer if symptoms persist at day 7, until resolution or stabilisation  
 1803 of symptoms) and unsolicited AEs for 28 days. Diary cards will collect information on the timing and severity of  
 1804 the following solicited AEs:

1805  
 1806

**Table 2. Solicited AEs collected on post-vaccination diary cards**

|                               |                                                                                                                 |
|-------------------------------|-----------------------------------------------------------------------------------------------------------------|
| <b>Local solicited AEs</b>    | Pain, Tenderness, Redness, Warmth, Itch, Swelling, Induration                                                   |
| <b>Systemic solicited AEs</b> | Fever, Feverishness, Chills, Joint pains, Muscle pains, Fatigue, Headache, Malaise, Nausea, Vomiting, Diarrhoea |

1807

1808 Post-vaccination (7 and 28 day) diary cards will be reviewed by a clinician daily, and participants may be  
 1809 telephoned to discuss further, should there be any clinical concerns.

1810 Participants will also be instructed on the use of the Medically Attended Diary Card. They will be asked to record  
 1811 the following healthcare encounters up until 3 months post booster dose:

1812

- GP visits that were not planned or routine
- Attendances at A&E
- Unplanned outpatient visits to hospital e.g. attending an “Ambulatory Care” unit
- Non-routine dental visits (i.e. dental emergency)

1813

1814

1815

1816 In addition for the General cohort boosted at 84 days, the booster diary will contain questions surrounding daily  
 1817 function and independence.

1818 This information will be reviewed routinely only at follow up visits. The diary card will contain an instruction to  
 1819 contact the trial team by telephone should any encounter be a hospitalisation, or if they have concerns about their  
 1820 health.

1821 Participants entering the COVID-19 pathway will also be asked to complete a diary, see section 11.6.5 below.

1822

### 11.6.2 Booster Vaccination

1823 Prior to starting the booster phase of the study, any newly available and relevant safety data will be reviewed from  
 1824 animal studies or clinical trials of coronavirus vaccines included in this study being tested elsewhere, and  
 1825 discussed with the DSMB and/or MHRA as necessary. While there will be no planned safety pause, a review  
 1826 of reactogenicity data will be conducted after the initial 50 - 60 participants have received a booster dose at the  
 1827 28 day post prime time-point only (approximately half of which will be in the heterologous prime/boost groups).  
 1828 This will assess reactogenicity in the first 48 hours after immunisation. Should significant safety concerns arise at  
 1829 this point the DSMB will be consulted.

1830 For the General cohort boosted at 84 days only, a further optional randomisation will occur to randomise  
 1831 participants to prophylactic or reactive paracetamol sub-arms.

1832 Participants consenting to this sub-study will be verbally advised by a member of the clinical team performing  
 1833 this study visit to either:

1834

- ‘Take paracetamol as soon as possible after immunisation, and take 3 further doses at 4 to 6 hourly intervals’ (prophylactic paracetamol arm)
- ‘Take paracetamol only if you feel unwell’ (reactive paracetamol arm)

1835

1836

1837 Participants will be advised that the paracetamol dosing should be as indicated in the instructions for this over the  
 1838 counter medication and that they should not exceed the maximum stated dose.

1839 For participants not consenting to the sub-study, they will be advised that taking paracetamol may be beneficial  
 1840 for symptom relief.

1841

1842

### 11.6.3 Subsequent visits

1843 Follow-up visits will take place as per the schedule of attendances described in APPENDIX A: SCHEDULE OF  
 1844 PROCEDURES. Participants will be assessed for local and systemic adverse events, interim history, review of  
 1845 diary cards (paper or electronic) and blood, nasal fluid and (optional) saliva tests at these time points as detailed  
 1846 in the schedule of attendances. Blood will also be taken for immunology purposes. Observations and physical  
 1847 exam will be performed as and when clinically indicated.

1848 If participants experience adverse events (laboratory or clinical), which the investigator (physician), CI and/or  
 1849 DSMB chair determine necessary for further close observation, the participant may be admitted to an NHS hospital  
 1850 for observation and further medical management under the care of the Consultant on call.

1851

1852

### 11.6.4 Timing of study visit around national COVID-19 immunisation program '3rd dose' boosts

1853 Participation in this study should not unreasonably delay a participant’s receipt of any additional COVID-19  
 1854 vaccine boost doses offered to them through the national immunisation program. This applies only to doses that  
 1855 are being offered as explicit ‘third dose’ boosts, in a recommended NHS programme. The V7 (last study visits)

1856

1857 may be completed at any point in the visit window if it is to facilitate data collection prior to participant receipt  
 1858 of non-study boosts, with a goal for this visit to be completed at the latest date possible prior to the booster dose.  
 1859 Should participants not be offered non-study boosts, the V7 (last study visit) should be completed as close to the  
 1860 end of the visit window, as is feasible.

1861

### 1862 **11.6.5 Participants under quarantine**

1863 Given the evolving epidemiological situation both globally and in the UK, should a participant be unable to attend  
 1864 any of their scheduled or unscheduled visits, a telephone consultation will be arranged in order to obtain core  
 1865 study data where possible. Participants should not attend for in-person visits if they are in their period of self-  
 1866 isolation/quarantine – the exception to this is the COVID-19 Pathway.

1867

### 1868 **11.6.6 Participants with confirmed SARS-CoV-2 infection (COVID-19 Pathway)**

1869 Participants will be counselled at enrolment that should they receive a positive SARS-CoV-2 test (e.g. an antigen  
 1870 detection or nucleic acid amplification test, for example, via test and trace or occupational health services) they  
 1871 should contact the trial team on receipt of the positive result. Participants will be reminded of this with a weekly  
 1872 text/email message (participant choice), which will commence after the first vaccine dose.

1873 This COVID-19 (C19) pathway will apply to participants tested via symptomatic and asymptomatic pathways.

1874 Once the participant has conveyed their result to the study team, confirmatory documentation will be sought from  
 1875 the participant (such as a forwarded result email or a picture of a lateral flow assay result). If the participant  
 1876 cannot provide this, but the study team are confident that an appropriate test was used from verbal description,  
 1877 they may proceed without documentation. An appointment will be arranged to review the participant at the  
 1878 relevant study site. At this visit blood samples for safety (FBC, Biochemistry, CRP and others if deemed clinically  
 1879 relevant) and immunology (PBMCs and serum for cellular and humoral immune responses will be taken. Nasal  
 1880 fluid +/- salivary samples for mucosal immune response will be taken from participants who undergo these at  
 1881 their routine visits i.e. those in the immunology cohort and the subset of 100 participants from the general cohort  
 1882 boosted at 84 days. A nasopharyngeal swab for storage and subsequent viral isolation will be taken from all  
 1883 participants attending the C19P visit. Vital signs and other clinical data will be recorded. Participants will also be  
 1884 provided with a symptom diary, which they will fill in both solicited and unsolicited symptoms for at least 7 days  
 1885 and until symptom resolution (excepting persistent cough and anosmia/dysgeusia as these are recognised to be  
 1886 able to continue for extended periods). Additional visits on this pathway may be arranged at the clinical discretion  
 1887 of the investigator.

1888 Participants will only be invited to a C19P visit if they have access to private transport and would not require  
 1889 assistance to attend the visit. Participants may not attend the visit using public transport or taxis.

1890 The window for performing this visit is within 7 days of a positive test result.

1891 Participants should be screened for severity of disease on contacting the trial team with their positive result and  
 1892 referred to NHS care as appropriate.

1893

1894

1895

1896

1897

1898

1899

1900 **Table 3. Remote risk stratification of COVID-19 infection**

| Severity of illness | Features                                            | Advice and action                                                                                                                  |
|---------------------|-----------------------------------------------------|------------------------------------------------------------------------------------------------------------------------------------|
| <b>Mild</b>         | Completing full sentences                           | Paracetamol for fever                                                                                                              |
|                     | No SOB (Grade 0)                                    | Can use NSAIDs according to NHS recommendations (advise lowest dose and shortest duration possible)                                |
|                     | No chest tightness (Grade 0)                        | Regular fluids                                                                                                                     |
|                     | Able to do ADLS (Grade 0-1)                         | Self-isolate as per current government guidelines                                                                                  |
|                     | RR 12-20                                            | Safety net re worsening symptoms:<br>- Trial doctor for advice in hours (999 in an emergency)<br>- 111 out of hours (non-emergent) |
|                     | No other red flags/concerning features from history | Paracetamol for fever                                                                                                              |
| <b>Moderate A</b>   | Completing full sentences                           | Can use NSAIDs according to NHS recommendations (advise lowest dose and shortest duration possible)                                |

|                                                                                                                                                                                                                                                                                                                   |                                                                                            |                                                                                                                                                                                                         |
|-------------------------------------------------------------------------------------------------------------------------------------------------------------------------------------------------------------------------------------------------------------------------------------------------------------------|--------------------------------------------------------------------------------------------|---------------------------------------------------------------------------------------------------------------------------------------------------------------------------------------------------------|
|                                                                                                                                                                                                                                                                                                                   | Able to do ADLs but lethargic (Grade 1-2)                                                  | Regular fluids                                                                                                                                                                                          |
|                                                                                                                                                                                                                                                                                                                   | Mild chest tightness (Grade 1)                                                             | Self-isolate as per current government guidelines                                                                                                                                                       |
|                                                                                                                                                                                                                                                                                                                   | Mild SOB on exertion only (Grade 1)                                                        | Safety net re worsening symptoms:<br>- Trial doctor for advice in hours (999 in an emergency)<br>111 out of hours (non-emergent)                                                                        |
|                                                                                                                                                                                                                                                                                                                   | RR 12-20 (if can be observed)                                                              |                                                                                                                                                                                                         |
|                                                                                                                                                                                                                                                                                                                   | Any symptoms from other systems considered to be moderate and not requiring medical review |                                                                                                                                                                                                         |
|                                                                                                                                                                                                                                                                                                                   | No other red flag features from history                                                    |                                                                                                                                                                                                         |
| <b>Moderate B</b>                                                                                                                                                                                                                                                                                                 | Completing full sentences                                                                  | For medical review<br>- Trial doctor to arrange medical review with a non-trial medical practitioner e.g. GP or hospital doctor (in-hours)<br>- Trial doctor to signpost to NHS services (out-of hours) |
|                                                                                                                                                                                                                                                                                                                   | Able to do ADLs but lethargic (Grade 1-2)                                                  | Safety net – 999 if worsening beyond current symptoms                                                                                                                                                   |
|                                                                                                                                                                                                                                                                                                                   | Mild chest tightness (Grade 1-2)                                                           | Inform senior on-call clinician                                                                                                                                                                         |
|                                                                                                                                                                                                                                                                                                                   | Mild SOB on exertion only (Grade 1)                                                        |                                                                                                                                                                                                         |
|                                                                                                                                                                                                                                                                                                                   | RR 20-24 (if can be observed)                                                              |                                                                                                                                                                                                         |
|                                                                                                                                                                                                                                                                                                                   | Any symptoms from other systems considered to be moderate and requiring medical review     |                                                                                                                                                                                                         |
| <b>Severe</b>                                                                                                                                                                                                                                                                                                     | Any one of:                                                                                | Urgent medical review                                                                                                                                                                                   |
|                                                                                                                                                                                                                                                                                                                   | Inability to complete full sentences                                                       | Advise participant to call 999                                                                                                                                                                          |
|                                                                                                                                                                                                                                                                                                                   | Unable to do any ADLs/get out of bed (Grade 3)                                             | Inform senior on-call clinician                                                                                                                                                                         |
|                                                                                                                                                                                                                                                                                                                   | RR >25 if can be observed                                                                  |                                                                                                                                                                                                         |
|                                                                                                                                                                                                                                                                                                                   | Any other clinical concerns for severe disease                                             |                                                                                                                                                                                                         |
| <b>Of note, this is not an all-encompassing guide and individual clinical judgement by reviewing clinician should always be taken into account. Should the reviewing clinician have any concerns regardless of risk stratification then they can contact the appropriate senior clinician for further advice.</b> |                                                                                            |                                                                                                                                                                                                         |

1901

1902

### 11.6.7 Admission of participants to hospital with COVID-19 infection

1903 With the participant's consent, the study team will request access to medical notes or submit a data collection  
1904 form for completion by attending clinical staff on any COVID-19 episodes resulting in hospitalisation. Any data  
1905 which are relevant to assessing for disease enhancement will be collected. These are likely to include, but not  
1906 limited to, information on ICU admissions, clinical parameters such as oxygen saturation, respiratory rates and  
1907 vital signs, need for oxygen therapy, need for ventilatory support, imaging and blood tests results, amongst others.

1908

1909

## 11.7 Sample Handling

1911 Please refer to APPENDIX D BLOOD SAMPLING for schedule of frequency and volume of blood sampling.

1912

### 11.7.1 Sample handling for trial purposes

#### 11.7.1.1 Immunology blood tests

1915 Immunogenicity will be assessed by a variety of immunological assays. This will include antibodies to SARS-  
1916 CoV-Spike and non-Spike antigens by ELISA, ex vivo ELISpot assays for interferon gamma and flow cytometry  
1917 assays, neutralising and other functional antibody assays. Other exploratory immunological assays including  
1918 cytokine analysis and other antibody assays, DNA analysis of genetic polymorphisms potentially relevant to  
1919 vaccine immunogenicity and gene expression studies amongst others may be performed at the discretion of the  
1920 Investigators.

1921 Collaboration with other specialist laboratories in the UK, Europe and outside of Europe for further exploratory  
1922 tests may occur. This would involve the transfer of serum, plasma, PBMC and/or other study samples to these  
1923 laboratories, but these would remain anonymised. The analyses and which laboratories carry these out will be  
1924 specified in the laboratory analysis plan.



1925 Subjects will be informed that there may be leftover samples of their blood (after all testing for this study is  
1926 completed), and that such samples may be stored indefinitely for possible future research (exploratory  
1927 immunology), including genotypic testing of genetic polymorphisms potentially relevant to vaccine  
1928 immunogenicity. Subjects will be able to decide if they will permit such future use of any leftover samples. With  
1929 the participants' informed consent, any leftover cells and serum/plasma will be frozen indefinitely for future  
1930 analysis of COVID-19 and other coronaviruses related diseases or vaccine-related responses. If a subject elects  
1931 not to permit this, all of that participants' leftover samples will be discarded at the end of the trial.  
1932 Samples that are to be stored for future research will be transferred to the OVC Biobank (REC 16/SC/0141).  
1933

#### 11.7.1.2 Nasal fluid & saliva samples

1934  
1935 An exploratory analysis of mucosal immunity will be conducted using nasal fluid and saliva collected at each visit  
1936 in the immunology cohort (n=100) and in a convenience sample of approximately 100 participants boosted at 84  
1937 days, in the general cohort, using SAM-strips (synthetic absorptive matrix). Saliva samples will be optional and  
1938 only be taken from D28 onwards. All participants who have been allocated to groups who will have SAM-strip  
1939 +/- saliva sampling at their routine visits, will also have SAM-strips +/- saliva taken at the C19P visit if they attend  
1940 this visit. Analysis will be conducted initially with IgA and IgG ELISAs, with further exploratory immunology  
1941 assays conducted based on results – more detail will be included in the laboratory analysis plan. The same  
1942 statements regarding collaboration, storage and use of samples as for blood in Section 11.7.1.1 apply here.  
1943

#### 11.7.1.3 Nasopharyngeal swabs

1944  
1945 Participants seen in the C-19 pathway will have nasopharyngeal swabs taken (instructions on performing sampling  
1946 in CSP). These swabs will be tested for presence of the SARS-Cov-2 virus centrally. This analysis is for research  
1947 purposes, and will not be conducted in 'real-time', so will not be used to inform the requirements for participant  
1948 self-isolation etc. Swabs, and/or samples obtained from them, will be stored for potential further analysis (e.g.  
1949 whole genome sequencing of identified SARS-CoV-2).  
1950

#### 11.7.2 Sample handling for standard of care

1951  
1952 **Urinary pregnancy testing** for female participants of child bearing potential only, urine will be tested for beta-  
1953 human chorionic gonadotrophin ( $\beta$ -HCG) at screening and again immediately prior to booster vaccination. This  
1954 will be a point of care test and no sample will be stored.  
1955

##### 11.7.2.1 Safety monitoring blood tests

1956  
1957 These will be processed at agreed NHS Trust laboratories, and destroyed in accordance with standard NHS  
1958 processes. They will include:

- 1959 • **Haematology** – Full Blood Count
- 1960 • **Biochemistry** – Sodium, Potassium, Urea, Creatinine, Albumin, Liver Function Tests (ALT, ALP,  
1961 Bilirubin) and if relevant C-reactive protein (CRP)  
1962

#### 11.8 Early Discontinuation/Withdrawal of Participants

1963  
1964 In accordance with the principles of the current revision of the Declaration of Helsinki and any other applicable  
1965 regulations, a participant has the right to withdraw from the study at any time and for any reason, and is not obliged  
1966 to give his or her reasons for doing so. The Investigator may withdraw the participant at any time in the interests  
1967 of the participants' health and well-being. In addition, the participant may withdraw/be withdrawn for any of the  
1968 following reasons:

- 1969 • Administrative decision by the Investigator
- 1970 • Ineligibility (either arising during the study or retrospectively, having been overlooked at screening).
- 1971 • Significant protocol deviation
- 1972 • Participant non-compliance with study requirements
- 1973 • An AE, which requires discontinuation of the study involvement or results in inability to continue to  
1974 comply with study procedures

1975 The reason for withdrawal will be recorded in the CRF. If withdrawal is due to an AE, appropriate follow-up visits  
1976 or medical care will be arranged, with the agreement of the volunteer, until the AE has resolved, stabilised or a  
1977 non-trial related causality has been assigned. The DSMB or DSMB chair may recommend withdrawal of  
1978 participants.

1979 Participants may choose to withdraw from the trial if they are offered vaccination as part of the national vaccine  
1980 roll out programme. If the participant chooses to withdraw after receipt of 2 vaccine doses, they will not be  
1981 unblinded prior to any planned mass unblinding of all trial participants as this will not change clinical action for  
1982 them (The Green Book states that two doses of any licensed vaccine would not require further booster doses, even

1983 if they are heterologous). If the participant withdraws after receipt of 1 vaccine dose, but prior to booster dose,  
1984 then they may be unblinded at the point of vaccine offer from the national programme.  
1985 If a participant withdraws from the study, storage of samples will continue unless the participant specifically  
1986 requests otherwise. Any data collected before their withdrawal will still be used in the analysis for safety and trial  
1987 integrity; if the participant requests this could be de-identified following the end of the study.  
1988 In cases of subject withdrawal, long-term safety data collection, including some procedures such as safety bloods,  
1989 may continue as appropriate if subjects have received one or more vaccine doses, unless they decline any further  
1990 follow-up.  
1991

### 11.8.1 Contraindications to receipt of second (booster) dose of vaccine

1992 The following AEs associated with any vaccine, identified on or before the day of vaccination constitute absolute  
1993 contraindications to further administration of a study vaccine to the participant in question. If any of these events  
1994 occur during the study, the subject will not be eligible to receive a booster dose and will be followed up by the  
1995 clinical team or their GP until resolution or stabilisation of the event:

- 1997 • Anaphylactic reaction following administration of vaccine
- 1998 • Pregnancy
- 1999 • Any AE that in the opinion of the Investigator may affect the safety of the participant or the interpretation  
2000 of the study results

2001 Participants who develop COVID-19 symptoms and have a positive SARS-CoV-2 nucleic acid amplification test  
2002 or antigen test after the first vaccination can only receive a booster dose after a minimum 4 weeks interval from  
2003 their first positive test, provided their symptoms have significantly improved. The decision to proceed with booster  
2004 vaccinations in those cases will be at clinical discretion of the investigators. For participants who are asymptomatic  
2005 and have a positive SARS-CoV-2 test, also a minimum of 4 weeks from first test positivity will be required before  
2006 boosting provided they remain asymptomatic.  
2007

### 11.9 Definition of End of Trial

2008 The end of the trial is the date of the last assay conducted on the last sample collected.  
2009  
2010

## 12 TRIAL INTERVENTIONS

### 12.1 Investigational Medicinal Product(s) (IMP) Description

2012 The marketing authorisation status of the vaccines included here is that the ChadOx1-nCoV-19 vaccine is  
2013 approved for use under a temporary authorisation of the supply of an unlicensed vaccine; regulation 174 of the  
2014 Human Medicines Regulations 2012. The BNT162b2 vaccine received a conditional marketing authorisation from  
2015 the European Medicines Agency on the 21st December 2020.

2016 There will not be IMP labelling for this trial, products will be used as supplied by manufacturer (as for national  
2017 supply) and blinding performed as per section 11.5.  
2018  
2019

#### 12.1.1.1 Vaccine A – AstraZeneca COVID-19 vaccine (ChAdOx1 nCoV-19)

2020 ChAdOx1 nCoV-19 is a recombinant replication-defective chimpanzee adenovirus expressing the SARS-CoV-2  
2021 spike (S) surface glycoprotein with a leading tissue plasminogen activator (TPA) signal sequence. S is a type I,  
2022 trimeric, transmembrane protein located at the surface of the viral envelope, giving rise to spike shaped protrusions  
2023 from the virion. The S proteins subunits are responsible for cellular receptor ACE-2 binding via the receptor-  
2024 binding domain and fusion of virus and cell membranes, thereby mediating the entry of SARS-CoV-2 into the  
2025 target cells. The S protein has an essential role in virus entry and determines tissue and cell tropism, as well as  
2026 host range.  
2027

2028 ChAdOx1 nCoV-19 expresses a codon-optimised coding sequence for Spike protein from the SARS-CoV-2  
2029 genome sequence accession MN908947. ChAd is a non-enveloped virus, and the glycoprotein antigen is not  
2030 present in the vector, but is only expressed once the genetic code within the vector enters the target cells. The  
2031 vector genes are also modified to render the virus replication incompetent, and to enhance immunogenicity  
2032 (Garafalo et al, 2020). Once the vector is in the nucleus, mRNA encoding the spike protein is produced that then  
2033 enters the cytoplasm. This then leads to translation of the target protein which act as an intracellular antigen  
2034

#### 12.1.1.2 Dosage, scheduling and packaging

2035 The dose of AstraZeneca COVID-19 vaccine is 0.5ml. The vaccine should be administered intramuscularly. For  
2036 homologous groups receiving this vaccine, the schedule will be two doses, a minimum of 28 days apart, in  
2037 heterologous groups only a single dose is given. The AstraZeneca vaccine is supplied in packs of 10 vials. Each  
2038 vial contains 8 or 10 doses of vaccine, and is a colourless to slightly yellow, clear to slightly opaque liquid. Each  
2039 dose is prepared by withdrawing 0.5 mL from a vial in a sterile 1 mL or equivalent syringe.  
2040  
2041

2042 **12.1.2 VACCINE B – Pfizer BioNTech (BNT162b2)**

2043 BNT162b2 is a lipid nanoparticle-formulated, nucleoside-modified mRNA vaccine that encodes trimerised  
2044 SARS-CoV-2 spike glycoprotein. BNT162b2 encodes the SARS-CoV-2 full-length spike, modified by two  
2045 proline mutations to lock it in the prefusion conformation and more closely mimic the intact virus with which the  
2046 elicited virus-neutralizing antibodies must interact. mRNA vaccines use the pathogen’s genetic code as the  
2047 vaccine; this then exploits the host cells to translate the code and then make the target spike protein. The protein  
2048 then acts as an intracellular antigen to stimulate the immune response. The mRNA is then degraded within days.  
2049 The vaccine RNA is formulated in lipid nanoparticles (LNPs) for more efficient delivery into cells after  
2050 intramuscular injection.

2051

2052 **12.1.2.1 Dosage, scheduling and packaging**

2053 The dose of Pfizer BioNTech COVID-19 vaccine is 30µg contained in 0.3ml of the diluted vaccine. For  
2054 homologous groups receiving this vaccine, the schedule will be two doses, a minimum of 28 days apart, in  
2055 heterologous groups only a single dose is given. Each pack of the Pfizer BioNTech vaccine contains 195 vials  
2056 with 5 doses per vial (975 doses per pack). It is supplied with 0.9% sodium chloride diluent for injection plastic  
2057 ampoules.

2058

2059 **12.1.3 Blinding of IMPs**

2060 See Section 11.5 for detail.

2061

2062 **12.1.4 Storage of IMP**

2063 Vaccines will be stored in accordance with manufacturers’ recommendations.

2064 All movements of the study vaccines will be documented in accordance with existing standard operating  
2065 procedure (SOP). Vaccine accountability, storage, shipment and handling will be in accordance with relevant  
2066 SOPs and forms. To allow for participants to receive the vaccine in a short time period, additional clinic locations  
2067 may be used. In this instance vaccines will be transported in accordance with local SOP’s and approvals as  
2068 required.

2069

2070 **12.1.4.1 Vaccine A – AstraZeneca COVID-19 vaccine (ChAdOx1 nCOV-19)**

2071 The AstraZeneca vaccine should be stored at +2°C to +8°C and has a shelf life of 6 months. Further packing down  
2072 (splitting of packs) of lots to aid deployment can occur at 2-8 °C within its shelf life. Handling may occur for up  
2073 to 2 hours at temperatures less than 25° C, prior to puncture. The vaccine does not contain any preservative. After  
2074 first opening the vial, it should be used within 6 hours when stored at room temperature (2-25° C). After this time,  
2075 the vial must be discarded.

2076

2077 **12.1.4.2 Vaccine B - Pfizer BioNTech (BNT162b2)**

2078 - Frozen unopened vial

2079 The Pfizer BioNTech vaccine should be stored at -90°C to -60°C and has shelf life of 6 months. Unopened vials  
2080 may be stored and transported at -25°C to -15°C for a single period of up to 2 weeks and can be returned to -90°C  
2081 to -60°C.

2082 - Thawed unopened vial

2083 Once thawed, the vaccine may be stored for 1 month at 2-8°C. Within the 1-month shelf-life at 2 °C to 8 °C, up  
2084 to 12 hours may be used for transportation. Prior to use, the unopened vial can be stored for up to 2 hours at  
2085 temperatures up to 30 °C. Once thawed, the vaccine should not be re-frozen

2086 - Handling of temperature excursions once removed from the freezer

2087 Stability data indicate that the unopened vial is stable for up to: \* 24 hours when stored at temperatures from -3  
2088 °C to 2 °C \* a total of 4 hours when stored at temperatures from 8 °C to 30 °C; this includes the 2 hours at up to  
2089 30 °C detailed above. This information is intended to guide healthcare professionals only in case of temporary  
2090 temperature excursion.

2091 - Transfers if frozen vials stored at ultra-low temperature (<-60°C)

2092 Closed-lid vial trays containing 195 vials removed from ultra-low temperature frozen storage (< -60 °C) may be  
2093 at temperatures up to 25 °C for up to 5 minutes.

2094 Open-lid vial trays, or vial trays containing less than 195 vials, removed from ultra-low temperature frozen storage  
2095 (< 60°C) may be at temperatures up to 25 °C for up to 3 minutes.

2096 After vial trays are returned to frozen storage following temperature exposure up to 25 °C, they must remain in  
2097 frozen storage for at least 2 hours before they can be removed again.

2098 - Transfers of frozen vials stored at -25°C to -15°C

2099 Closed-lid vial trays containing 195 vials removed from frozen storage (-25°C to -15°C) may be at temperatures  
2100 up to 25°C for up to 3 minutes.

2101 Open-lid vial trays, or vial trays containing less than 195 vials, removed from frozen storage (-25°C to -15°C)  
 2102 may be at temperatures up to 25°C for up to 1 minute.  
 2103 Once a vial is removed from the vial tray, it should be thawed for use.

2104 - Diluted medicinal product

2105 Chemical and physical in-use stability, including during transportation, has been demonstrated for 6 hours at 2 °C  
 2106 to 30 °C after dilution in sodium chloride 9 mg/mL (0.9%) solution for injection. From a microbiological point of  
 2107 view, unless the method of dilution precludes the risk of microbial contamination, the product should be used  
 2108 immediately. If not used immediately, in-use storage times and conditions are the responsibility of the user.

2109 - Special precautions for storage

2110 Store in a freezer at -90 °C to -60 °C. Store in the original package in order to protect from light. During storage,  
 2111 minimise exposure to room light, and avoid exposure to direct sunlight and ultraviolet light. Thawed vials can be  
 2112 handled in room light conditions  
 2113

2114 **12.1.5 Compliance with Trial Treatment**

2115 All vaccinations will be administered by the research team and recorded in the CRF. The study medication will  
 2116 be at no time in the possession of the participant and compliance will not, therefore, be an issue.  
 2117

2118 **12.1.6 Accountability of the Trial Treatment**

2119 Accountability of the IMPs will be conducted in accordance with the relevant SOPs.  
 2120

2121 **12.1.7 Concomitant Medication**

2122 As set out by the exclusion criteria, volunteers may not enter the study if they have received: any vaccine other  
 2123 than the licensed seasonal influenza vaccine or pneumococcal vaccine in the 30 days prior to enrolment or there  
 2124 is planned receipt of any other vaccine within 30 days of each vaccination, any investigational product within 30  
 2125 days prior to enrolment or if receipt is planned during the study period, or if there is any use of immunosuppressant  
 2126 medication within 6 months prior to enrolment or if receipt is planned at any time during the study period (except  
 2127 topical steroids and short course of low dose steroids < 14 day). Concomitant medications taken at enrolment will  
 2128 be recorded, as will new medications taken within the 28 days after each immunisation. Subsequently only new  
 2129 medications taken in response to a medically attended adverse event up until 3 months post boost will be recorded.  
 2130

2131 **12.1.8 Post-trial Treatment**

2132 If any heterologous boost regimen is not found to be non-inferior participants who received this regimen will be  
 2133 advised of this. Decisions regarding the need for a booster dose, the nature of the booster dose and mode of  
 2134 delivery (e.g. NHS vs study site) will be made in consultation with the DSMB and study management group.  
 2135

2136 **12.2 Other Treatments (non-IMPS)**

2137 Participants will be advised that they may take paracetamol prophylactically after vaccine administration. This  
 2138 will be from the participants own supplies rather than supplied by the study team. Participants receiving a boost  
 2139 dose at a day 84 interval will have the option of undergoing randomisation to be advised to take paracetamol  
 2140 ‘prophylactically’ versus ‘reactively’. Participants will be asked to obtain their own paracetamol supplies, it will  
 2141 not be issued by the study team.  
 2142

2143 **12.3 Other Interventions**

2144 There are no additional investigations other than those specified in this protocol.  
 2145

2146 **13 SAFETY REPORTING**

2147 **13.1 Safety reporting window**

2148 Safety reporting for the trial will commence once the first participant is consented; and will end when the last  
 2149 participants has completed their last study visit SAEs and Adverse Events of Special Interest (AESI)s.

2150 For individual participants the reporting period begins when they are consented, in person, at the V1 visit , and  
 2151 ends once they have completed the last study visit (V7) for SAE’s and AESI’s.

2152 All adverse events (AEs) that result in a participants’ withdrawal from the study will be followed up until a  
 2153 satisfactory resolution occurs, or until a non-study related causality is assigned (if the participant consents to this).  
 2154

2155 **13.2 Adverse Event Definitions**

|                           |                                                                                                                                                                                           |
|---------------------------|-------------------------------------------------------------------------------------------------------------------------------------------------------------------------------------------|
| <b>Adverse Event (AE)</b> | Any untoward medical occurrence in a participant to whom a medicinal product has been administered, including occurrences which are not necessarily caused by or related to that product. |
|---------------------------|-------------------------------------------------------------------------------------------------------------------------------------------------------------------------------------------|

|                                                              |                                                                                                                                                                                                                                                                                                                                                                                                                                                                                                                                                                                                                                                                                                                                                                                                                                                                                                                                            |
|--------------------------------------------------------------|--------------------------------------------------------------------------------------------------------------------------------------------------------------------------------------------------------------------------------------------------------------------------------------------------------------------------------------------------------------------------------------------------------------------------------------------------------------------------------------------------------------------------------------------------------------------------------------------------------------------------------------------------------------------------------------------------------------------------------------------------------------------------------------------------------------------------------------------------------------------------------------------------------------------------------------------|
| <b>Adverse Reaction (AR)</b>                                 | An untoward and unintended response in a participant to an investigational medicinal product which is related to any dose administered to that participant. The phrase "response to an investigational medicinal product" means that a causal relationship between a trial medication and an AE is at least a reasonable possibility, i.e. the relationship cannot be ruled out. All cases judged by either the reporting medically qualified professional or the Sponsor as having a reasonable suspected causal relationship to the trial medication qualify as adverse reactions.                                                                                                                                                                                                                                                                                                                                                       |
| <b>Adverse Events of Special Interest (AESI)</b>             | Adverse events identified as being of particular relevance to the IMP's. These will also reported as an SAE, if meeting SAE criteria (e.g. hospitalisation)                                                                                                                                                                                                                                                                                                                                                                                                                                                                                                                                                                                                                                                                                                                                                                                |
| <b>Serious Adverse Event (SAE)</b>                           | A serious adverse event is any untoward medical occurrence that: <ul style="list-style-type: none"> <li>• Results in death</li> <li>• Is life-threatening</li> <li>• Requires inpatient hospitalisation or prolongation of existing hospitalisation</li> <li>• Results in persistent or significant disability/incapacity</li> <li>• Consists of a congenital anomaly or birth defect*</li> </ul> Other 'important medical events' may also be considered a serious adverse event when, based upon appropriate medical judgement, the event may jeopardise the participant and may require medical or surgical intervention to prevent one of the outcomes listed above.<br>NOTE: The term "life-threatening" in the definition of "serious" refers to an event in which the participant was at risk of death at the time of the event; it does not refer to an event which hypothetically might have caused death if it were more severe. |
| <b>Serious Adverse Reaction (SAR)</b>                        | An adverse event that is both serious and, in the opinion of the reporting Investigator, believed with reasonable probability to be due to one of the trial treatments, based on the information provided.                                                                                                                                                                                                                                                                                                                                                                                                                                                                                                                                                                                                                                                                                                                                 |
| <b>Suspected Unexpected Serious Adverse Reaction (SUSAR)</b> | A serious adverse reaction, the nature and severity of which is not consistent with the Reference Safety Information for the medicinal product in question set out: <ul style="list-style-type: none"> <li>• In the case of a product with a marketing authorisation, in the approved summary of product characteristics (SmPC) for that product</li> <li>• In the case of any other investigational medicinal product, in the approved investigator's brochure (IB) relating to the trial in question</li> </ul>                                                                                                                                                                                                                                                                                                                                                                                                                          |

2156  
2157  
2158  
2159  
2160  
2161  
2162  
2163  
2164  
2165  
2166  
2167  
2168  
2169  
2170  
2171  
2172  
2173  
2174  
2175  
2176  
2177  
2178  
2179

NB: to avoid confusion or misunderstanding of the difference between the terms "serious" and "severe", the following note of clarification is provided: "Severe" is often used to describe intensity of a specific event, which may be of relatively minor medical significance. "Seriousness" is the regulatory definition supplied above.

### 13.3 Assessment results outside of normal parameters as AEs and SAEs

#### 13.3.1 Clinical

Abnormal clinical findings from medical history or examination will be assessed as to their clinical significance throughout the trial. If an abnormal finding is deemed to be clinically significant, the participant will be informed and appropriate medical care arranged with the permission of the participant as per Section 11.6.

#### 13.3.2 Laboratory

Abnormal clinical findings from safety blood tests will be assessed by a medically qualified study member. Laboratory AEs will be assessed using specific toxicity grading scales adapted from the FDA Toxicity Grading Scale for Healthy Adult and Adolescent Volunteers Enrolled in Preventive Vaccine Clinical Trials (APPENDIX C: Toxicity grading scale for lab AEs)

Any abnormal test result deemed clinically significant may be repeated to ensure it is not a single occurrence, if deemed appropriate to do so in the medical opinion of the investigator.

If a repeated test remains clinically significant, the participant will be informed and appropriate medical care arranged as appropriate and with the permission of the volunteer.

2180 **13.4 Assessment of severity**

2181 The severity of clinical and laboratory adverse events will be assessed according to scales based on FDA toxicity  
 2182 grading scales for healthy adult volunteers enrolled in preventive vaccine clinical trials, listed in the Clinical Study  
 2183 Plan and in Table 4-6 below.

2184

2185 **Table 4. Severity grading for local adverse events**

| Adverse Event                                                                                                                             | Grade | Intensity                                       |
|-------------------------------------------------------------------------------------------------------------------------------------------|-------|-------------------------------------------------|
| <b>Pain at injection site</b>                                                                                                             | 1     | Pain that is easily tolerated                   |
|                                                                                                                                           | 2     | Pain that interferes with daily activity        |
|                                                                                                                                           | 3     | Pain that prevents daily activity               |
|                                                                                                                                           | 4     | A&E visit or hospitalization                    |
| <b>Tenderness</b>                                                                                                                         | 1     | Mild discomfort to touch                        |
|                                                                                                                                           | 2     | Discomfort with movement                        |
|                                                                                                                                           | 3     | Significant discomfort at rest                  |
|                                                                                                                                           | 4     | A&E visit or hospitalization                    |
| <b>Erythema at injection site*</b>                                                                                                        | 1     | 2.5 - 5 cm                                      |
|                                                                                                                                           | 2     | 5.1 - 10 cm                                     |
|                                                                                                                                           | 3     | >10 cm                                          |
|                                                                                                                                           | 4     | Necrosis or exfoliative dermatitis              |
| <b>Induration/Swelling at injection site</b>                                                                                              | 1     | 2.5 – 5 cm and does not interfere with activity |
|                                                                                                                                           | 2     | 5.1 - 10 cm or interferes with activity         |
|                                                                                                                                           | 3     | >10 cm or prevents daily activity               |
|                                                                                                                                           | 4     | Necrosis                                        |
| <b>*erythema <math>\leq</math>2.5cm is an expected consequence of skin puncture and will therefore not be considered an adverse event</b> |       |                                                 |

2186

2187

2188

2189

2190

2191

2192

2193

2194

2195

2196

2197

2198

2199

2200

2201

**Table 5. Severity grading criteria for physical observations**

| Vital Signs                          | Grade 1 (mild) | Grade 2 (moderate) | Grade 3 (severe) | Grade 4 Potentially Life threatening                    |
|--------------------------------------|----------------|--------------------|------------------|---------------------------------------------------------|
| <b>Fever (Oral - °C)</b>             | 38.0 - 38.4    | 38.5 – 38.9        | 39.0 - 40        | > 40                                                    |
| <b>Tachycardia (bpm)*</b>            | 101 - 115      | 116 – 130          | >130             | A&E visit or hospitalisation for arrhythmia             |
| <b>Bradycardia (bpm)**</b>           | 50 – 54        | 45 – 49            | <45              | A&E visit or hospitalisation for arrhythmia             |
| <b>Systolic hypertension (mmHg)</b>  | 141 - 150      | 151 – 155          | $\geq$ 155       | A&E visit or hospitalization for malignant hypertension |
| <b>Diastolic hypertension (mmHg)</b> | 91 - 95        | 96 – 100           | >100             | A&E visit or hospitalization for malignant hypertension |

|                                                                                                                                                                                                                                                                                             |         |         |     |                                                    |
|---------------------------------------------------------------------------------------------------------------------------------------------------------------------------------------------------------------------------------------------------------------------------------------------|---------|---------|-----|----------------------------------------------------|
| <b>Systolic hypotension (mmHg)***</b>                                                                                                                                                                                                                                                       | 85 - 89 | 80 – 84 | <80 | A&E visit or hospitalization for hypotensive shock |
| <b>Respiratory Rate (breaths per minute)</b>                                                                                                                                                                                                                                                | 17 - 20 | 21-25   | >25 | Intubation                                         |
| <b>*Taken after ≥10 minutes at rest **When resting heart rate is between 60 – 100 beats per minute. Use clinical judgement when characterising bradycardia among some healthy subject populations, for example, conditioned athletes. ***Only if symptomatic (e.g. dizzy/ light-headed)</b> |         |         |     |                                                    |

2202  
2203**Table 6. Severity grading for local and systemic AEs**

| GRADE 0        | None                                                                                                                                   |
|----------------|----------------------------------------------------------------------------------------------------------------------------------------|
| <b>GRADE 1</b> | Mild: Transient or mild discomfort (< 48 hours); No interference with activity; No medical intervention/therapy required               |
| <b>GRADE 2</b> | Moderate: Mild to moderate limitation in activity – some assistance may be needed; no or minimal medical intervention/therapy required |
| <b>GRADE 3</b> | Severe: Marked limitation in activity, some assistance usually required; medical intervention/therapy required.                        |
| <b>GRADE 4</b> | Potentially Life-threatening; Requires assessment in A&E or hospitalisation                                                            |

2204  
2205  
2206  
2207  
2208  
2209  
2210  
2211  
2212  
2213  
2214  
2215  
2216  
2217  
2218  
2219  
2220  
2221  
2222  
2223  
2224  
2225  
2226  
2227  
2228  
2229  
2230  
2231**13.5 Assessment of Causality**

For every AE, an assessment of the relationship of the event to the administration of the vaccine will be undertaken by the CI-delegated clinician. An interpretation of the causal relationship of the intervention to the AE in question will be made, based on the type of event; the relationship of the event to the time of vaccine administration; and the known biology of the vaccine therapy. Alternative causes of the AE, such as the natural history of pre-existing medical conditions, concomitant therapy, other risk factors and the temporal relationship of the event to vaccination will be considered and investigated. Causality assessment will take place during planned safety reviews, interim analyses (including if the study is paused by the DSMB due to safety concerns) and at the final safety analysis, except for SAEs, which should be assigned by the reporting investigator, immediately, as described in SOP OVC005 Safety Reporting for CTIMPs. Causality assessment will be recorded on the eCRF.

**Table 7. Guidelines for assessing the relationship of vaccine administration to an AE**

|          |                 |                                                                                                                                                                                                                                          |
|----------|-----------------|------------------------------------------------------------------------------------------------------------------------------------------------------------------------------------------------------------------------------------------|
| <b>0</b> | No relationship | No temporal relationship to study product and Alternate aetiology (clinical state, environmental or other interventions); and Does not follow known pattern of response to study product                                                 |
| <b>1</b> | Unlikely        | Unlikely temporal relationship to study product <i>and</i> Alternate aetiology likely (clinical state, environmental or other interventions) <i>and</i> Does not follow known typical or plausible pattern of response to study product. |
| <b>2</b> | Possible        | Reasonable temporal relationship to study product; <i>or</i> Event not readily produced by clinical state, environmental or other interventions; <i>or</i> Similar pattern of response to that seen with other vaccines                  |
| <b>3</b> | Probable        | Reasonable temporal relationship to study product; <i>and</i> Event not readily produced by clinical state, environment, or other interventions <i>or</i> Known pattern of response seen with other vaccines                             |

|   |          |                                                                                                                                                                                                                      |
|---|----------|----------------------------------------------------------------------------------------------------------------------------------------------------------------------------------------------------------------------|
| 4 | Definite | Reasonable temporal relationship to study product; <i>and</i><br>Event not readily produced by clinical state, environment, or other interventions; <i>and</i><br>Known pattern of response seen with other vaccines |
|---|----------|----------------------------------------------------------------------------------------------------------------------------------------------------------------------------------------------------------------------|

2232

2233

### 13.6 Procedures for Reporting Adverse Events

2234

#### 13.6.1 Solicited AEs

2235 Participants will be asked to record local and systemic AE's for 7 days (and longer if symptoms persist at day

2236 seven, until resolution or stabilisation) following vaccination in the electronic diary (solicited AEs).

2237

2238

#### 13.6.2 Unsolicited AEs

2239 All local and systemic AEs occurring in the 28 days following each vaccination observed by the Investigator or

2240 reported by the participant, whether or not attributed to study medication, will be recorded in electronic diaries or

2241 study database. All AEs that result in a participants' withdrawal from the study will be followed up until a

2242 satisfactory resolution occurs, or until a non-study related causality is assigned (if the participant consents to this)

2243 as per Section 11.8.

2244 SAEs and AESIs will be actively solicited at each study visit throughout the entire trial period.

2245

2246

#### 13.6.3 Medically attended AEs

2247 A medically attended AE, is defined as any adverse event for which the participant seeks medical attention either

2248 at hospital or from primary care. This explicitly excludes seeking medical attention solely for a SARS-CoV2 test.

2249 Participants will be asked to record any medically attended AEs on their diary cards. Medically attended AEs

2250 occurring up to 3 months post boost, will be directly solicited and reviewed at each study visit.

2251

2252

### 13.7 Reporting Procedures for Serious Adverse Events

2253 In order to comply with current regulations on SAE reporting to regulatory authorities, the event will be

2254 documented accurately and notification deadlines respected. SAEs will be reported to members of the study team

2255 immediately the Investigators become aware of their occurrence, as described in the clinical study plan. Copies

2256 of all reports will be forwarded for review to the Chief Investigator (as the Sponsor's representative) within 24

2257 hours of the Investigator being aware of the suspected SAE. The DSMB will be notified of SAEs that are deemed

2258 possibly, probably or definitely related to study interventions; the chair of DSMB will be notified immediately

2259 (within 24 hours) of the sponsor being aware of their occurrence. SAE/AESIs will not normally be reported

2260 immediately to the ethical committee(s) unless there is a clinically important increase in occurrence rate, an

2261 unexpected outcome, or a new event that is likely to affect safety of trial participants, at the discretion of the Chief

2262 Investigator and/or DSMB. In addition to the expedited reporting above, the Investigator shall include all

2263 SAE/AESIs in the annual Development Safety Update Report (DSUR) report.

2264

2265 **Grade 4 laboratory AEs** should be reported as SAEs and under the category of outcome of an important medical

2266 event.

2267

2268 **Cases falling under the Hy's Law should be reported as SAEs.** A Hy's Law Case is defined by FDA Guidance

2269 for Industry "Drug-Induced Liver Injury: Premarketing Clinical Evaluation" (2009). Any study participant with

2270 an increase in Aspartate Aminotransferase (AST) or **Alanine Aminotransferase (ALT)  $\geq$  3x Upper Limit of**2271 **Normal (ULN) together with Total Bilirubin  $\geq$  2xULN, where no other reason can be found to explain the**2272 **combination of these abnormal results**, e.g., elevated serum alkaline phosphatase (ALP) indicating cholestasis,

2273 viral hepatitis A, B or C, another drug capable of causing the observed injury, amongst others.

2274 In participants who have received at least one dose of the ChAdOx1-nCoV-19 vaccine, SAE's will be reported to

2275 AstraZeneca according to the conditions and timelines outlined in the contemporaneous version of the

2276 'Pharmacovigilance Agreement by and between AstraZeneca UK Limited and Oxford University Innovation

2277 Limited for ChAdOx1 nCoV-19/AZD1222'.

2278

2279

#### 13.7.1 Events exempt from immediate reporting as SAEs

2280 Hospitalisation for a pre-existing condition, including elective procedures planned prior to study entry, which has

2281 not worsened, does not constitute a serious adverse event. A&amp;E attendances should not routinely be reported as

2282 SAEs unless they meet the SAE definition described above.

2283

2284

### 13.8 Expectedness

2285

#### 13.8.1 SAEs

2286 With the exception of the SAEs described below there are no expected serious adverse events in either homologous

2287 or heterologous study arms. All other SARs will therefore be reported as SUSARs.



2288  
2289  
2290  
2291  
2292  
2293  
2294  
2295  
2296  
2297  
2298  
2299  
2300  
2301  
2302  
2303  
2304  
2305  
2306  
2307  
2308  
2309  
2310  
2311  
2312  
2313  
2314  
2315  
2316  
2317  
2318  
2319  
2320  
2321  
2322  
2323  
2324  
2325  
2326  
2327  
2328  
2329  
2330  
2331  
2332  
2333  
2334  
2335  
2336  
2337  
2338  
2339  
2340  
2341  
2342  
2343  
2344  
2345

### 13.8.1.1 AstraZeneca COVID-19 vaccine (ChAdOx1 nCoV-19)

Anaphylaxis and capillary leak syndrome following immunisation is reported in the ChAdOx1 nCoV-19 Summary of Product Characteristics as expected adverse events of unknown frequency. Thrombosis with thrombocytopenia syndrome is a very rare expected adverse event.

### 13.8.1.2 Pfizer BioNTech (BNT162b2)

Anaphylaxis following immunisation is reported in the BNT162b2 Summary of Product Characteristics as an expected adverse event of unknown frequency. Accordingly, anaphylaxis within 24 hours of receipt of BNT162b2 as a prime dose, or as a boost in a homologous prime/boost schedule, will be considered an expected SAR to this vaccine. Acute peripheral facial nerve palsy and lymphadenopathy are described as rare and uncommon (respectively) adverse events following BNT162b2; should these be observed in participants receiving BNT162b2 and no other vaccine, and if they met the criteria for an SAE, these would be considered an expected SAE. If experienced in participants receiving BNT162b2 and another COVID-19 vaccine then they should be classified as 'unexpected'. Myocarditis and pericarditis are adverse events of unknown frequency.

## 13.8.2 Foreseeable adverse reactions

The foreseeable ARs following vaccination are as follows:

### 13.8.2.1 AstraZeneca COVID-19 vaccine (ChAdOx1 nCoV-19)

#### *Local reactions*

The following local reactions at the injection site are common and expected:

- tenderness, pain, warmth, redness, itching, swelling or bruising where the injection is given a lump at the injection site

#### *Systemic reactions*

Common and expected mild to moderate systemic reactions are:

- Fatigue
- Headache
- Myalgia
- Arthralgia
- Nausea or vomiting
- Malaise
- Chills
- Feverishness
- Fever >38°
- Coryza (sore throat, runny nose)
- Diarrhoea\*
- Influenza-like illness\*
- Pain in extremity\*

Uncommon and expected mild to moderate systemic reactions

- Abdominal pain
- Feeling dizzy
- Decreased appetite
- Enlarged lymph nodes
- Excessive sweating, itchy skin or rash
- Somnolence\*

Very rare systemic reactions

- Thrombosis with thrombocytopenia syndrome\*

Systemic reactions of unknown frequency

- Thrombocytopenia\*
- Capillary leak syndrome\*
- Angioedema\*
- Anaphylaxis\*
- Hypersensitivity\*

These are expected to be less common after the second dose.

#### *Laboratory events*

Transient neutropenia from baseline is common and expected.

2346 **13.8.2.2 Pfizer BioNTech (BNT162b2)**

2347 (Taken from SPC)

2348 *Very common*

- 2349 • Headache
- 2350 • Arthralgia
- 2351 • Myalgia
- 2352 • Injection site pain/swelling
- 2353 • Fatigue
- 2354 • Chills
- 2355 • Pyrexia
- 2356 • Diarrhoea\*

2357 *Common*

- 2358 • Nausea
- 2359 • Vomiting\*
- 2360 • Injection site redness

2361 *Uncommon*

- 2362 • Lymphadenopathy
- 2363 • Insomnia
- 2364 • Pain in extremity
- 2365 • Malaise
- 2366 • Injection site pruritis

2367 *Rare*

- 2368 • Acute peripheral facial paralysis

2369 *Not known*

- 2370 • Anaphylaxis, hypersensitivity
- 2371 • Myocarditis, pericarditis\*
- 2372 • Excessive swelling of vaccinated limb\*
- 2373 • Facial swelling\*

2374 \* These adverse events were added at the time of SA11 when the investigator's brochure/SmPC for both  
 2375 BNT162b2 and ChAdOx1 nCoV-19 were updated. If any of these adverse events were reported as severe, prior  
 2376 to the date of approval of this amendment, they would be classified as SUSARs. Once approval has been given,  
 2377 any future events will be classified as SAEs.

2378

2379 **13.9 Adverse events of special interest (AESI)**

2380 The following adverse events are considered adverse events of special interest.

2381

2382

2383

2384

2385

2386

2387

2388

2389

2390

**Table 8. AESIs**

| <b>Immunologic</b>    | Anaphylaxis                                 |                                                                                                 |
|-----------------------|---------------------------------------------|-------------------------------------------------------------------------------------------------|
| <b>Neurological</b>   | Isolated anosmia/ageusia*                   | Meningoencephalitis                                                                             |
|                       | Guillain-Barre Syndrome                     | Peripheral facial nerve palsy                                                                   |
|                       | Acute disseminated encephalomyelitis (ADEM) | Generalised convulsion                                                                          |
|                       | Aseptic meningitis                          | Myelitis                                                                                        |
| <b>Haematological</b> | Thrombosis**                                | Coagulation disorder (includes thrombosis, thromboembolism, internal/external bleed and stroke) |
|                       | Stroke                                      |                                                                                                 |
|                       | Thrombocytopenia***                         |                                                                                                 |
|                       | Eosinophilia****                            |                                                                                                 |

|                                                                                                                                                                                                                                                                                                                                                                                                                                                                                                                                                                                                                                                                                                                                                                                                                                                                                                                                                                                                                                                                                                                                                                                                                                                                    |                                                                                                          |                                          |
|--------------------------------------------------------------------------------------------------------------------------------------------------------------------------------------------------------------------------------------------------------------------------------------------------------------------------------------------------------------------------------------------------------------------------------------------------------------------------------------------------------------------------------------------------------------------------------------------------------------------------------------------------------------------------------------------------------------------------------------------------------------------------------------------------------------------------------------------------------------------------------------------------------------------------------------------------------------------------------------------------------------------------------------------------------------------------------------------------------------------------------------------------------------------------------------------------------------------------------------------------------------------|----------------------------------------------------------------------------------------------------------|------------------------------------------|
| <b>Cardiac</b>                                                                                                                                                                                                                                                                                                                                                                                                                                                                                                                                                                                                                                                                                                                                                                                                                                                                                                                                                                                                                                                                                                                                                                                                                                                     | Acute cardiovascular injury (includes myocarditis, pericarditis, arrhythmias, heart failure, infarction) |                                          |
| <b>Dermatological</b>                                                                                                                                                                                                                                                                                                                                                                                                                                                                                                                                                                                                                                                                                                                                                                                                                                                                                                                                                                                                                                                                                                                                                                                                                                              | Chilblain-like lesions<br>Single organ cutaneous vasculitis                                              | Erythema multiforme<br>Alopecia          |
| <b>Gastrointestinal</b>                                                                                                                                                                                                                                                                                                                                                                                                                                                                                                                                                                                                                                                                                                                                                                                                                                                                                                                                                                                                                                                                                                                                                                                                                                            | Acute liver injury †††                                                                                   |                                          |
| <b>Respiratory</b>                                                                                                                                                                                                                                                                                                                                                                                                                                                                                                                                                                                                                                                                                                                                                                                                                                                                                                                                                                                                                                                                                                                                                                                                                                                 | ARDS††                                                                                                   |                                          |
| <b>Renal</b>                                                                                                                                                                                                                                                                                                                                                                                                                                                                                                                                                                                                                                                                                                                                                                                                                                                                                                                                                                                                                                                                                                                                                                                                                                                       | Acute kidney injury                                                                                      |                                          |
| <b>Other</b>                                                                                                                                                                                                                                                                                                                                                                                                                                                                                                                                                                                                                                                                                                                                                                                                                                                                                                                                                                                                                                                                                                                                                                                                                                                       | COVID-19 disease†                                                                                        | SARS-CoV2 positivity on a validated test |
| <p>*In the absence of COVID-19<br/> ** Excluding superficial thrombophlebitis (including line-associated)<br/> *** G3 or above<br/> **** This will be used as a marker of skewed Th2 responses and will be routinely monitored in participants attending the COVID-19 Pathway and follow-up visits. Only G2 and above.<br/> † In particular, any occurrence of suspected vaccine associated enhanced disease (VAED) as defined by most recent Brighton Collaboration Case Definition (REF)<br/> †† In the absence of an infective aetiology (including COVID-19)<br/> ††† As defined in Hy's Law (see Cases falling under the Hy's Law should be reported as SAEs. A Hy's Law Case is defined by FDA Guidance for Industry "Drug-Induced Liver Injury: Premarketing Clinical Evaluation" (2009). Any study participant with an increase in Aspartate Aminotransferase (AST) or <b>Alanine Aminotransferase (ALT) ≥ 3x Upper Limit of Normal (ULN) together with Total Bilirubin ≥ 2xULN, where no other reason can be found to explain the combination of these abnormal results</b>, e.g., elevated serum alkaline phosphatase (ALP) indicating cholestasis, viral hepatitis A, B or C, another drug capable of causing the observed injury, amongst others.)</p> |                                                                                                          |                                          |

2391  
2392  
2393  
2394  
2395  
2396  
2397  
2398  
2399  
2400  
2401  
2402

AESIs should be collected and recorded in the AE reporting form in RedCap throughout the duration of this study. These should also be reported as SAEs if they fulfil the definition criteria for SAEs. All AESI's not already reported as SAEs should be included in the reports to the DSMB.

#### **Disease enhancement following vaccination**

Severe COVID-19 disease will be defined as hospitalisation, with further grading of severity according to the WHO ordinal scale (June 2020) (Marshall et al., 2020). Cases of COVID-19 disease will be examined for the possibility of vaccine associated enhanced disease (VAED). This will be evaluated on the basis of the most recent recommendations of the Brighton Collaboration. (Collaboration, 2020) Detailed clinical parameters will be collected from medical records and aligned with agreed definitions, as they emerge. Samples will be collected for evaluation of immunological evidence of VAED. Investigations will be defined by the laboratory analysis plan.

### **13.10 SUSAR Reporting**

All SUSARs will be reported by the sponsor delegate to the relevant Competent Authority and to the REC and other parties as applicable. For fatal and life-threatening SUSARs, this will be done no later than 7 calendar days after the Sponsor or delegate is first aware of the reaction. Any additional relevant information will be reported within 8 calendar days of the initial report. All other SUSARs will be reported within 15 calendar days.

Principal Investigators will be informed of all SUSARs for the relevant IMP for all studies with the same Sponsor, whether or not the event occurred in the current trial.

### **13.11 Development Safety Update Reports**

A Development Safety Update Report (DSUR) will be prepared annually for each vaccine, within 60 days of the anniversary of:

- The date of conditional marketing approval from the European Medicines Agency for BNT162b2
- The date of the MHRA's first authorisation for the University of Oxford to conduct a clinical trial for ChAdOx1-nCoV19.

The DSURs will be submitted to the Competent Authority, Ethics Committee, HRA (where required), Host NHS Trust and Sponsor.

As per Pharmacovigilance Plan, AZ and Novavax will be responsible respectively for generating DSUR reports for COM-COV studies. Sponsor will be responsible for generating DSUR reports for all other vaccines.

2421

2422 **13.12 Interim reviews**

2423 The safety profile will be assessed on an on-going basis by the Investigators. The CI and relevant Investigators  
2424 (as per the trial delegation log) will also review safety issues and SAEs as they arise. A review of reactogenicity  
2425 data will occur after the first 50-60 participants have been boosted, as per section 11.6.2.

2426 The DSMB will evaluate safety data every 4-8 weeks and/or as required and will review safety data accumulated  
2427 when the study is fully recruited. The DSMB may also be consulted should safety concerns arise at any point.  
2428

2429 **13.13 Safety Holding Rules**

2430 There will be no formal pausing rules given the vaccines used in this study will be approved for use in the general  
2431 public, and the Immunisation 'Green Book' is permissive of the administration of heterologous prime/boost  
2432 schedules in the general community. Reactogenicity data will be reviewed after the first 50-60 participants have  
2433 received a booster dose.

2434 The study can be put on hold upon advice of the DSMB, Chief Investigator, Study Sponsor, regulatory authority,  
2435 Ethical Committee(s), for any single event or combination of multiple events which, in their professional opinion,  
2436 jeopardise the safety of the participants or the reliability of the data.  
2437

2438 **13.14 Contraception and pregnancy**

2439 **13.14.1 Contraception**

2440 Female participants of childbearing potential are required to use an effective form of contraception from one  
2441 month before prime until three months after boost immunisation. A woman of childbearing potential is defined as  
2442 a pre-menopausal female who is capable of becoming pregnant. Menopause can be diagnosed in a woman aged  
2443 over 50 after one year of amenorrhoea (this applies only if the woman is not using hormonal contraception).

2444 Acceptable forms of contraception for volunteers of female sex include:

- 2445 • Established use of oral, injected or implanted hormonal methods of contraception
- 2446 • Placement of an intrauterine device (IUD) or intrauterine system (IUS)
- 2447 • Total hysterectomy
- 2448 • Bilateral Tubal Occlusion
- 2449 • Barrier methods of contraception (condom or occlusive cap with spermicide)
- 2450 • Male sterilisation, if the vasectomised partner is the sole partner for the subject
- 2451 • True abstinence, when this is in line with the preferred and usual lifestyle of the subject (Periodic  
2452 abstinence and withdrawal are not acceptable methods of contraception)  
2453

2454 **13.14.2 Pregnancy**

2455 Should a participant become pregnant during the trial, no further study IMP will be administered. They will be  
2456 followed up for clinical safety assessment with their ongoing consent and in addition will be followed until  
2457 pregnancy outcome is determined. We would not routinely perform venepuncture in a pregnant participant unless  
2458 there is clinical need.  
2459

2460 **14 STATISTICS**

2461 **14.1 Sample size**

2462 The primary analysis of this study will be a non-inferiority comparison between schedules using a homologous  
2463 versus heterologous boost within each group of approved COVID-19 vaccines, e.g., Group ChAdOx1 nCoV-19/  
2464 BNT162b2 will be compared with group ChAdOx1 nCoV-19 / ChAdOx1 nCoV-19 and group BNT162b2 /  
2465 ChAdOx1 nCoV-19 will be compared with group BNT162b2/ BNT162b2, separately. We will combine the  
2466 immunology cohort (N=100) and the general cohort boosted at D28 (N=360) in the primary analysis. The analysis  
2467 will be repeated in the general cohort boosted at D84 (N=360), and all the study population in the secondary  
2468 analysis (N=820).

2469 The below sample size calculation is based on the primary analysis conducted in the participants boosted at D28.  
2470 The current available data from the ongoing ChAdOx1 nCoV-19 trial suggests the GMC of anti-spike IgG  
2471 measured by standardised ELISA is around 500 EU/ml at D56 (4 weeks after booster at Day 28) among  
2472 participants aged 56-69 years old (n=29) with a standard deviation of 0.4.

2473 The sample calculation is based on the following assumptions:

- 2474 1. The non-inferiority margin is 0.63 fold-difference between the GMC in the heterologous boost arm and  
2475 that in the homologous boost arm or -0.2 absolute difference of GMC on log scale (base 10).
- 2476 2. The standard deviation of GMC on log scale (base 10) is 0.4 based on the current available data.
- 2477 3. The true difference of GMC on log scale (base 10) is 0.

2478 Based on the above assumptions, the study will need to recruit 86 participants who are seronegative for SARS-  
2479 CoV-2 IgG at baseline in each arm to achieve 90% of power at one-sided 2.5% significance level. We assume  
2480 ~25% of study participants will be excluded from the primary analysis due to seropositive for SARS-CoV-2 IgG

2481 at baseline or loss of follow-up. Therefore, the sample size in each arm boosted at D28 will be expanded to 115.  
 2482 This means that if the study has two vaccines the total sample size for participants boosted at D28 will be 460 for  
 2483 four arms. If we decide to add groups as new vaccines are made available for use by the Department of Health  
 2484 and Social Sciences, the sample sizes will be adapted accordingly. The immunogenicity cohort will be used for  
 2485 exploratory analyses to generate hypothesis, and thus no formal sample size calculation was carried out for this  
 2486 cohort. The sample size of 25 per arm was therefore chosen based on practical constraints. This means we will  
 2487 have around 20 seronegative participants in each arm for analysis.  
 2488 Of note, should a correlate of protection against SARS-CoV-2 infection become apparent during the study then  
 2489 the sample size calculations will be re-visited to determine the power to demonstrate non-inferiority based on a  
 2490 margin of 10% between the above study arms, and potentially revised on this basis. Based on the sample size  
 2491 anticipated for two vaccines in the study, we summarised the study power for different proportion of protection  
 2492 at one-sided significant level 0.05 (with no adjustment for multiple testing).  
 2493

| Proportion of protection | Study power |
|--------------------------|-------------|
| 0.85                     | 58%         |
| 0.9                      | 71%         |
| 0.95                     | 91%         |

2494 We chose the sample size of 360 (effective sample size N=270) in the general cohort who will be boosted at D84  
 2495 for two reasons: 1) simplifying the study management and randomisation; 2) >80% power to test non-inferiority  
 2496 of the heterologous schedule compared with the homologous schedule at one-sided 2.5% significance level,  
 2497 assuming there is no interaction between vaccine schedules and prime-boost intervals. In addition, with a  
 2498 combined analysis (all study population, N=820) to assess the immunogenicity at D28 post boost, the study will  
 2499 have >95% power and the conclusion will have a broader generalisability to the UK population.  
 2500  
 2501

## 2502 14.2 Description of Statistical Methods

2503 The primary endpoint is anti-spike IgG measured by standardised ELISA at Day 56. The geometric mean  
 2504 concentrations (GMC) of anti-spike IgG will be compared between heterologous boost arms and homologous  
 2505 boost arms under the hypothesis:

2506 H0:  $\text{GMC}_{\text{heterologous}} / \text{GMC}_{\text{homologous}} \leq 0.63$  or  $\log_{10} \text{GMC}_{\text{heterologous}} - \log_{10} \text{GMC}_{\text{homologous}} \leq -0.2$ ;

2507 H1:  $\text{GMC}_{\text{heterologous}} / \text{GMC}_{\text{homologous}} > 0.63$  or  $\log_{10} \text{GMC}_{\text{heterologous}} - \log_{10} \text{GMC}_{\text{homologous}} > -0.2$ .

2508 The anti-spike IgG titre will be transformed using logarithmic transformations (base 10) to render a normal  
 2509 distribution. We will test the above hypothesis using linear regression models on  $\log_{10}\text{GMC}$  adjusting for  
 2510 randomisation design variables, and the pre-specified prognostic factors, if any. The adjusted mean difference of  
 2511  $\log_{10}\text{GMC}$  will be presented with the one-sided 97.5% confidence interval (CI). We will claim heterologous boost  
 2512 arm is non-inferior to homologous boost arm if the lower CI lies above -0.2.

2513 The primary analysis will be conducted on a per-protocol basis among participants who are seronegative at  
 2514 baseline and whose primary endpoint at D28 post boost is available, as the intent to treat analysis no longer  
 2515 produces the most conservative estimation in non-inferiority trials. A modified intent to treat analysis will also  
 2516 be conducted as a sensitivity analysis. The primary analysis will be carried out when the primary endpoint of D56  
 2517 anti-spike IgG data become available.

2518 The secondary analysis on D28 post boost anti-spike IgG in the participants boosted at D84 (D112) will follow  
 2519 the primary analysis, and will be carried out when the D112 data become available. We will also combine the  
 2520 participants boosted at D28 and D84 as a secondary analysis to compare the D28 post boost anti-spike IgG  
 2521 between heterologous and homologous schedules.

2522 A fully detailed statistical analysis plan (SAP) will be prepared and will be signed off by the Chief Investigator  
 2523 prior to conducting any data analyses.  
 2524

## 2525 14.3 Interim analysis

2526 We will carry out an interim analysis to review the seropositive rate at baseline after the D0 immunogenicity data  
 2527 for the first 100 participants becomes available. If there is a significant deviation from our assumption, we will  
 2528 adjust the sample size accordingly.

2529 On 7<sup>th</sup> April 2021, the MHRA and JCVI updated their guidance regarding the use of ChAdOx1 nCoV-19 in the  
 2530 under-30 age group in the UK, along with the change of guidance in a few other countries worldwide. There is an  
 2531 increased urgency to release the reactogenicity data in heterologous schedules. To facilitate the future vaccination  
 2532 strategy worldwide, the study team, in consultation with the Trial Steering Committee, decided to conduct an  
 2533 interim analysis on the reactogenicity data in the participants boosted at 4 weeks. The analysis will be carried out

2534 once the data is cleaned and the Study Analysis Plan is signed off. This will be no stopping rule for this interim  
2535 analysis and the analysis will not affect the continuation of the trial.  
2536

#### 2537 **14.4 Missing data**

2538 The level and pattern of the missing data in the baseline variables will be reported. The potential causes of any  
2539 missing data will be investigated and documented as far as possible. Any missing data will be dealt with, if needed,  
2540 using methods appropriate to the conjectured missing mechanism and level of missing.

### 2541 **15 DATA MANAGEMENT**

2542 The Chief Investigator will be responsible for all data that accrues from the study.  
2543  
2544

#### 2545 **15.1 Access to Data & Data Protection**

2546 Direct access will be granted to authorised representatives from the Sponsor, host institution and the regulatory  
2547 authorities to permit trial-related monitoring, audits and inspections. The study protocol, documentation, data and  
2548 all other information generated will be held in strict confidence. No information concerning the study or the data  
2549 will be released to any unauthorised third party, without prior written approval of the sponsor.  
2550

#### 2551 **15.2 Data Recording**

2552 All study data including participant diary will be recorded directly into an EDC system (REDCap) or onto a paper  
2553 source document for later entry into EDC if direct entry is not available. This includes safety, laboratory and  
2554 outcome data. Any additional information that needs recording, but is not relevant for the eCRF (e.g signed  
2555 consent forms) will be recorded on separate paper source documents. All documents will be stored safely and  
2556 securely in confidential conditions. The EDC online data is stored on University of Oxford servers.

2557 All participant reported adverse event data (both solicited & unsolicited) will be entered onto electronic diary  
2558 cards (e-diaries) for a maximum of 28 days following administration of the IMP. The eDiary provides a full audit  
2559 trial of edits and will be reviewed at time-points as indicated in the schedule of events. Any adverse event  
2560 continuing beyond the period of the diary will be copied into the eCRF as required for safety review.

2561 The participants will be identified by a unique trial specific number and code in any database. The name and any  
2562 other identifying detail will NOT be included in any trial data electronic file, with the exception of the electronic  
2563 diaries, for which consent will be obtained to store the participant email address for quality control purposes. Only  
2564 site research staff and sponsor data managers have access to view the email address.

2565 The EDC system (CRF data) uses a relational database (MySQL/ PostgreSQL) via a secure web interface with  
2566 data checks applied during data entry to ensure data quality. The database includes a complete suite of features  
2567 which are compliant with GCP, EU and UK regulations and Sponsor security policies, including a full audit trail,  
2568 user-based privileges, and integration with the institutional LDAP server. The MySQL and PostgreSQL database  
2569 and the webserver will both be housed on secure servers maintained by the University of Oxford IT personnel.  
2570 The servers are in a physically secure location in Europe. Backups will be stored in accordance with the IT  
2571 department schedule of daily, weekly, and monthly retained for one month, three months, and six months,  
2572 respectively. The IT servers provide a stable, secure, well-maintained, and high capacity data storage environment.  
2573 REDCap is a widely-used, powerful, reliable, well-supported system. Access to the study's database will be  
2574 restricted to members of the study team by username and password.  
2575  
2576  
2577  
2578

#### 2579 **15.3 Record keeping**

2580 The Investigators will maintain appropriate medical and research records for this trial, in compliance with GCP  
2581 and regulatory and institutional requirements for the protection of confidentiality of volunteers. The Chief  
2582 Investigator, co-Investigators and clinical research nurses will have access to records. The Investigators will  
2583 permit authorised representatives of the Sponsor(s) and Host institution, as well as ethical and regulatory agencies  
2584 to examine (and when required by applicable law, to copy) clinical records for the purposes of quality assurance  
2585 reviews, audits and evaluation of the study safety and progress.

2586 Identifiable information such as contact details will be stored for a minimum of 5 years from the end of the study.  
2587 This includes storage of consent forms. Storage of these data will be reviewed every 5 years and files will be  
2588 confidentially destroyed if storage is no longer required. Considerations at the time of this review will include the  
2589 value of retaining this information for participant safety (e.g. to inform participants of unexpected safety signals  
2590 emerging from post-licensing surveillance), as a resource for the participants (e.g. if they wish to check which  
2591 vaccines they have received in the study) and any regulatory requirements. Financial information will be stored  
2592 for 7 years. De-identified research data maybe be stored indefinitely. If volunteers consent to be contacted for  
2593 future research, a record of this consent will be recorded, retained and stored securely and separately from the

2594 research data. If volunteers consent to have their samples stored and used in future research, information about  
2595 their consent form will be retained and stored securely as per Biobanking procedures and SOP.  
2596

#### 2597 **15.4 Source Data and Case Report Forms (CRFs)**

2598 All protocol-required information will be collected in CRFs designed by the Investigator. All source documents  
2599 will be filed in the participant file. Source documents are original documents, data, and records from which the  
2600 participant CRF data are obtained. For this study, these will include, but are not limited to, volunteer consent form,  
2601 blood results, GP response letters, laboratory records, diaries, medical records and correspondence. In the majority  
2602 of cases, CRF entries will be considered source data as the CRF is the site of the original recording (i.e. there is  
2603 no other written or electronic record of data). In this study this will include, but is not limited to medical history,  
2604 medication records, vital signs, physical examination records, urine assessments, safety blood results, adverse  
2605 event data and details of vaccinations. All source data and participant files will be stored securely.

2606 To prevent withdrawal of a participant due to relocation, if there is a nearby participating site and with the consent  
2607 of the participant, copies of relevant participant research records (such as ICF, paper source documents) will be  
2608 transferred to the local site using secure email addresses such as nhs.net or by password protected sheets. The  
2609 electronic research data stored on REDCap will also be transferred to the new site. The original records will be  
2610 retained by the recruiting site.  
2611

#### 2612 **15.5 Data Quality**

2613 Data collection tools will undergo appropriate validation to ensure that data are collected accurately and  
2614 completely. Datasets provided for analysis will be subject to quality control processes to ensure analysed data is  
2615 a true reflection of the source data.

2616 Trial data will be managed in compliance with local data management SOPs. If additional, study specific processes  
2617 are required, an approved Data Management Plan will be implemented  
2618

#### 2619 **15.6 Data Sharing**

2620 For participants who are also registered on NHS Digital's 'Sign up to be contacted for coronavirus vaccine studies'  
2621 service, we will share the minimum amount of information necessary with NHS Digital in order to allow them to  
2622 update their database so that participants are not contacted about further trials, as participants are permitted only  
2623 to be in one vaccine study at a time.

2624 Personally identifiable information will be shared with Public Health England regarding SARS-CoV2 PCR test  
2625 results depending on the most up to date legal requirement to report on Notifiable Diseases at the time.  
2626

### 2627 **16 QUALITY ASSURANCE PROCEDURES**

#### 2628 **16.1 Risk assessment**

2629 The trial will be conducted in accordance with the current approved protocol, GCP, relevant regulations and  
2630 standard operating procedures. A risk assessment and monitoring plan will be prepared before the study opens  
2631 and will be reviewed as necessary over the course of the trial to reflect significant changes to the protocol or  
2632 outcomes of monitoring activities.  
2633

#### 2634 **16.2 Monitoring**

2635 Monitoring will be performed according to Good Clinical Practice (GCP) guidelines by an external monitor.  
2636 Following written SOPs, the monitors will verify that the clinical trial is conducted and data are generated,  
2637 documented and reported in compliance with the protocol, GCP and the applicable regulatory requirements. The  
2638 investigator sites will provide direct access to all trial related source data/documents and reports for the purpose  
2639 of monitoring and auditing by the Sponsor or the Host institution and inspection by local and regulatory authorities  
2640

#### 2641 **16.3 Trial committees**

##### 2642 **16.3.1 Trial Steering Committee**

2643 A Trial Steering Committee will be formed to oversee the study, and advise the Study Management Committee  
2644 on key issues of study conduct, including, but not limited to, study pauses due to safety concerns on the advice of  
2645 the DSMB.  
2646

##### 2647 **16.3.2 Safety Monitoring Committee**

2648 A Data Safety Monitoring Board (DSMB) will be convened. The DSMB will evaluate frequency of events, safety  
2649 and efficacy data as specified in the DSMB charter. The DSMB will make recommendations concerning the  
2650 conduct, continuation or modification of the study for safety reasons to the Trial Steering Committee.

2651 The DSMB will review SAEs or AESIs deemed possibly, probably or definitively related to study interventions.  
2652 The DSMB will be notified within 24 hours of the Investigators' being aware of their occurrence. The DSMB can  
2653 recommend placing the study on hold if deemed necessary following a study intervention-related SAE.  
2654

### 2655 **16.3.3 Study Management Committee**

2656 Consists of the site Investigators and the Laboratory lead for Public Health England.  
2657

## 2658 **17 PROTOCOL DEVIATIONS**

2659 A trial related deviation is a departure from the ethically approved trial protocol or other trial document or process  
2660 (e.g. consent process or IMP administration) or from Good Clinical Practice (GCP) or any applicable regulatory  
2661 requirements. Deviations from the protocol will be documented in a protocol deviation form according to SOP  
2662 OVC027 and filed in the trial master file.

2663 These will be managed as per SOP OVC027.  
2664

## 2665 **18 SERIOUS BREACHES**

2666 The Medicines for Human Use (Clinical Trials) Regulations contain a requirement for the notification of "serious  
2667 breaches" to the MHRA within 7 days of the Sponsor becoming aware of the breach.

2668 A serious breach is defined as "A breach of GCP or the trial protocol which is likely to affect to a significant  
2669 degree –

2670 (a) the safety or physical or mental integrity of the subjects of the trial; or

2671 (b) the scientific value of the trial".

2672 In the event that a serious breach is suspected the Sponsor must be contacted within 1 working day. In  
2673 collaboration with the CI the serious breach will be reviewed by the Sponsor and, if appropriate, the Sponsor will  
2674 report it to the REC committee, Regulatory authority and the relevant NHS host organisation within seven calendar  
2675 days.  
2676

## 2677 **19 ETHICAL AND REGULATORY CONSIDERATIONS**

### 2678 **19.1 Declaration of Helsinki**

2679 The Investigator will ensure that this trial is conducted in accordance with the principles of the Declaration of  
2680 Helsinki.  
2681

### 2682 **19.2 Guidelines for Good Clinical Practice**

2683 The Investigator will ensure that this trial is conducted in accordance with relevant regulations and with Good  
2684 Clinical Practice.  
2685

### 2686 **19.3 Approvals**

2687 Following Sponsor approval the protocol, informed consent form, participant information sheet and any proposed  
2688 advertising material will be submitted to an appropriate Research Ethics Committee (REC), HRA (where  
2689 required), regulatory authorities (MHRA in the UK), and host institution(s) for written approval. No amendments  
2690 to this protocol will be made without consultation with, and agreement of, the Sponsor.

2691 The Investigator is responsible for ensuring that changes to an approved trial, during the period for which  
2692 regulatory and ethical committee(s) approval has already been given, are not initiated without regulatory and  
2693 ethical committee(s)' review and approval except to eliminate apparent immediate hazards to the subject (i.e. as  
2694 an Urgent Safety Measure).  
2695

### 2696 **19.4 Other Ethical Considerations**

2697 Study team members are not eligible for participation in the study. Family members of the study team are not  
2698 barred from inclusion in the trial.

2699 Participants eligible for routine SARS-CoV-2 immunisation as per national guidelines will not be excluded from  
2700 participation in the trial; but will be counselled specifically on the risks of receiving an unapproved schedule. In  
2701 particular, the risks of reduced efficacy and unforeseen safety concerns will be discussed.  
2702

### 2703 **19.5 Reporting**

2704 The CI shall submit once a year throughout the clinical trial, or on request, an Annual Progress Report to the REC,  
2705 HRA (where required), host organisation, funder (where required) and Sponsor. In addition, an End of Trial  
2706 notification and final report will be submitted to the MHRA, the REC, host organisation and Sponsor.  
2707



2708 **19.6 Transparency in Research**

2709 Prior to the recruitment of the first participant, the trial will have been registered on a publicly accessible database.  
2710 Results will be uploaded to the European Clinical Trial (EudraCT) Database within 12 months of the end of trial  
2711 declaration by the CI or their delegate. Where the trial has been registered on multiple public platforms, the trial  
2712 information will be kept up to date during the trial, and the CI or their delegate will upload results to all those  
2713 public registries within 12 months of the end of the trial declaration.  
2714

2715 **19.7 Participant Confidentiality**

2716 The study will comply with the General Data Protection Regulation (GDPR) and Data Protection Act 2018, which  
2717 require data to be de-identified as soon as it is practical to do so. The processing of personal data of participants  
2718 will be minimised by making use of a unique participant study number only on all study documents and any  
2719 electronic database(s), with the exception of informed consent forms, participant ID log and electronic diaries. All  
2720 documents will be stored securely and only accessible by study staff and authorised personnel. The study staff  
2721 will safeguard the privacy of participants' personal data. A separate confidential file containing identifiable  
2722 information will be stored in a secured location in accordance with the current data protection legislation.  
2723 Photographs of vaccination sites if required (with the participants' written, informed consent), will not include the  
2724 participants' face and will be identified by the date, trial code and subject's unique identifier. Once developed,  
2725 photographs will be stored as confidential records, as above. This material may be shown to other professional  
2726 staff, used for educational purposes, or included in a scientific publication.  
2727

2728 **19.8 Expenses and Benefits**

2729 Volunteers will be compensated for their time, the inconvenience of having blood tests and procedures, and their  
2730 travel expenses. The total amount compensated will depend on the exact number of visits, and whether any repeat  
2731 or additional visits are necessary. For all trial visits compensation will be calculated according to the following:

- 2732 • Travel expenses: £15 per visit
- 2733 • Inconvenience of blood tests: £10 per blood donation
- 2734 • Time required for visit: £20 per visit
- 2735

2736 **20 FINANCE AND INSURANCE**

2737 **20.1 Funding**

2738 The study is funded by the UK Government through the National Institute for Health Research (NIHR).  
2739

2740 **20.2 Insurance**

2741 The University has a specialist insurance policy in place which would operate in the event of any participant  
2742 suffering harm as a result of their involvement in the research (Newline Underwriting Management Ltd, at Lloyd's  
2743 of London). NHS indemnity operates in respect of the clinical treatment that is provided.  
2744

2745 **20.3 Contractual arrangements**

2746 Appropriate contractual arrangements will be put in place with all third parties.  
2747

2748 **21 PUBLICATION POLICY**

2749 The Investigators will be involved in reviewing drafts of the manuscripts, abstracts, press releases and any other  
2750 publications arising from the study. Data from the study may also be used as part of a thesis for a PhD or MD.  
2751

2752 **22 DEVELOPMENT OF A NEW PRODUCT/ PROCESS OR THE GENERATION OF**  
2753 **INTELLECTUAL PROPERTY**

2754 Ownership of IP generated by employees of the University vests in the University. The University will ensure  
2755 appropriate arrangements are in place as regards any new IP arising from the trial.  
2756

2757 **23 ARCHIVING**

2758 Study data may be stored electronically on a secure server, and paper notes will be kept in a key-locked filing  
2759 cabinet at the site. All essential documents will be retained for a minimum of 5 years after the study has finished  
2760 with 5 yearly reviews. The need to store study data for longer in relation to licensing of the vaccine will be subject  
2761 to ongoing review. For effective vaccines that may be licensed, we may store research data securely at the site at  
2762 least 15 years after the end of the study, subject to adjustments in clinical trials regulations. Where relevant  
2763 participants' bank details will be stored for 7 years in line with the site financial policy. De-identified research  
2764 data maybe be stored indefinitely, but with 5 yearly review.

2765 General archiving procedures will be conducted in compliance to SOP OVC020 Archiving.  
2766

2767 **24 REFERENCES**

- 2768 Agrawal, A., Tao, X., Algaissi, A., Garron, T., Narayanan, K., Peng, B., Couch, R., & Tseng, C.-T. (2016).  
 2769 Immunization with inactivated Middle East Respiratory Syndrome coronavirus vaccine leads to lung  
 2770 immunopathology on challenge with live virus. *Human Vaccines & Immunotherapeutics*, *12*(9), 2351–2356.  
 2771 <https://doi.org/10.1080/21645515.2016.1177688>
- 2772 Alharbi, N. K., Qasim, I., Almasoud, A., Aljami, H. A., Alenazi, M. W., Alhafufi, A., Aldibasi, O. S., Hashem, A. M.,  
 2773 Kasem, S., Albrahim, R., Aldubaib, M., Almansour, A., Temperton, N. J., Kupke, A., Becker, S., Abu-obaidah,  
 2774 A., Alkarar, A., Yoon, I.-K., Azhar, E., ... Balkhy, H. H. (2019). Humoral Immunogenicity and Efficacy of a  
 2775 Single Dose of ChAdOx1 MERS Vaccine Candidate in Dromedary Camels. *Scientific Reports 2019 9:1*, *9*(1), 1–  
 2776 11. <https://doi.org/10.1038/s41598-019-52730-4>
- 2777 Beigel, J. H., Tomashek, K. M., Dodd, L. E., Mehta, A. K., Zingman, B. S., Kalil, A. C., Hohmann, E., Chu, H. Y.,  
 2778 Luetkemeyer, A., Kline, S., Castilla, D. L. de, Finberg, R. W., Dierberg, K., Tapson, V., Hsieh, L., Patterson, T.  
 2779 F., Paredes, R., Sweeney, D. A., Short, W. R., ... Lane, H. C. (2020). Remdesivir for the Treatment of Covid-19  
 2780 — Final Report. *Https://Doi.Org/10.1056/NEJMoa2007764*, *383*(19), 1813–1826.  
 2781 <https://doi.org/10.1056/NEJMoa2007764>
- 2782 Collaboration, B. (2020). *COVID-19 - SPEAC - Brighton Collaboration*. <https://brightoncollaboration.us/covid-19/>
- 2783 Public Health England, P. (2020). *COVID-19: The Green Book, Chapter 14a*.  
 2784 <https://www.gov.uk/government/publications/covid-19-the-green-book-chapter-14a>
- 2785 Bi, F. (2016). Structure, Function, and Evolution of Coronavirus Spike Proteins. *Annual Review of Virology*, *3*(1), 237–  
 2786 261. <https://doi.org/10.1146/annurev-virology-110615-042301>
- 2787 Liu, L., Q. Wei., Lin, Q., Fang, J., Wang, H., Kwok, H., Tang, H., Nishiura, K., Peng, J., Tan, Z., Wu, T., Cheung, K.,  
 2788 Chan, K., Alvarez, X., Qin, C., Lackner, A., Perlman, S., Yuen, K., & Chen, Z. (2019). Anti-spike IgG causes  
 2789 severe acute lung injury by skewing macrophage responses during acute SARS-CoV infection. *JCI Insight*, *4*(4).  
 2790 <https://doi.org/10.1172/JCI.INSIGHT.123158>
- 2791 Lu, R., Zhao, X., Li, J., Niu, P., Yang, B., Wu, H., Wang, W., Song, H., Huang, B., Zhu, N., Bi, Y., Ma, X., Zhan, F.,  
 2792 Wang, L., Hu, T., Zhou, H., Hu, Z., Zhou, W., Zhao, L., ... Tan, W. (2020). Genomic characterisation and  
 2793 epidemiology of 2019 novel coronavirus: implications for virus origins and receptor binding. *The Lancet*,  
 2794 *395*(10224), 565–574. [https://doi.org/10.1016/S0140-6736\(20\)30251-8](https://doi.org/10.1016/S0140-6736(20)30251-8)
- 2795 Marshall, J. C., Murthy, S., Diaz, J., Adhikari, N. K., Angus, D. C., Arabi, Y. M., Baillie, K., Bauer, M., Berry, S.,  
 2796 Blackwood, B., Bonten, M., Bozza, F., Brunkhorst, F., Cheng, A., Clarke, M., Dat, V. Q., Jong, M. de, Denholm,  
 2797 J., Derde, L., ... Zhang, J. (2020). A minimal common outcome measure set for COVID-19 clinical research. *The*  
 2798 *Lancet Infectious Diseases*, *20*(8), e192–e197. [https://doi.org/10.1016/S1473-3099\(20\)30483-7](https://doi.org/10.1016/S1473-3099(20)30483-7)
- 2799 Medicines and Healthcare products Regulatory Agency, M. (2020). *Regulatory approval of Pfizer/BioNTech vaccine*  
 2800 *for COVID-19*. [https://www.gov.uk/government/publications/regulatory-approval-of-pfizer-biontech-vaccine-  
 2801 \*for-covid-19\*](https://www.gov.uk/government/publications/regulatory-approval-of-pfizer-biontech-vaccine-for-covid-19)
- 2802 Munster, V. J., Wells, D., Lambe, T., Wright, D., Fischer, R. J., Bushmaker, T., Saturday, G., van Doremalen, N.,  
 2803 Gilbert, S. C., de Wit, E., & Warimwe, G. M. (2017). Protective efficacy of a novel simian adenovirus vaccine  
 2804 against lethal MERS-CoV challenge in a transgenic human DPP4 mouse model. *Npj Vaccines 2017 2:1*, *2*(1), 1–  
 2805 4. <https://doi.org/10.1038/s41541-017-0029-1>
- 2806 Public Health England, P. (2013). *Vaccine safety and adverse events following immunisation: the green book, Chapter*  
 2807 *8*. [https://www.gov.uk/government/publications/vaccine-safety-and-adverse-events-following-immunisation-](https://www.gov.uk/government/publications/vaccine-safety-and-adverse-events-following-immunisation-the-green-book-chapter-8)  
 2808 *the-green-book-chapter-8*
- 2809 The RECOVERY Collaborative Group. (2020). Dexamethasone in Hospitalized Patients with Covid-19. *The New*  
 2810 *England Journal of Medicine*, *384*(8), 693–704. <https://doi.org/10.1056/NEJMoa2021436>
- 2811 Tseng, C.-T., Sbrana, E., Iwata-Yoshikawa, N., Newman, P., Garron, T., Atmar, R., Peters, C., & Couch, R. (2012).  
 2812 Immunization with SARS coronavirus vaccines leads to pulmonary immunopathology on challenge with the  
 2813 SARS virus. *PLoS One*, *7*(4). <https://doi.org/10.1371/JOURNAL.PONE.0035421>
- 2814 UK Government Department of Health & Social Care. (2020). *Coronavirus (COVID-19): guidance and support*.  
 2815 <https://www.gov.uk/coronavirus>
- 2816 Weingartl, H., Czub, M., Czub, S., Neufeld, J., Marszal, P., Gren, J., Smith, G., Jones, S., Proulx, R., Deschambault,  
 2817 Y., Grudeski, E., Andonov, A., He, R., Li, Y., Copps, J., Grolla, A., Dick, D., Berry, J., Ganske, S., ... Cao, J.  
 2818 (2004). Immunization with modified vaccinia virus Ankara-based recombinant vaccine against severe acute  
 2819 respiratory syndrome is associated with enhanced hepatitis in ferrets. *Journal of Virology*, *78*(22), 12672–12676.  
 2820 <https://doi.org/10.1128/JVI.78.22.12672-12676.2004>
- 2821 Zhou, P., Yang, X. lou, Wang, X. G., Hu, B., Zhang, L., Zhang, W., Si, H. R., Zhu, Y., Li, B., Huang, C. L., Chen, H.  
 2822 D., Chen, J., Luo, Y., Guo, H., Jiang, R. di, Liu, M. Q., Chen, Y., Shen, X. R., Wang, X., ... Shi, Z. L. (2020). A  
 2823 pneumonia outbreak associated with a new coronavirus of probable bat origin. *Nature*, *579*(7798), 270–273.  
 2824 <https://doi.org/10.1038/s41586-020-2012-7>
- 2825 Zhu, N., Zhang, D., Wang, W., Li, X., Yang, B., Song, J., Zhao, X., Huang, B., Shi, W., Lu, R., Niu, P., Zhan, F., Ma,  
 2826 X., Wang, D., Xu, W., Wu, G., Gao, G. F., & Tan, W. (2020). A Novel Coronavirus from Patients with Pneumonia

2827 in China, 2019. *The New England Journal of Medicine*, 382(8), 727–733.  
2828 <https://doi.org/10.1056/NEJMOA2001017>  
2829  
2830  
2831  
2832  
2833  
2834  
2835  
2836  
2837  
2838

**25 APPENDIX A: SCHEDULE OF PROCEDURES****General cohort boosted at 28 days**

|                                             | Screening | V1                           | V2                | V3                | V6                  | V7                  | (VPP)<br>Only if enter C19P    |
|---------------------------------------------|-----------|------------------------------|-------------------|-------------------|---------------------|---------------------|--------------------------------|
| <b>Study timeline</b>                       |           | D0                           | D28               | D56               | D182                | D364                | (D0-D364)                      |
| <b>Study window</b>                         |           | Within 120 days of screening | Day 28–35 post V1 | Day 25–32 post V2 | Day 142-166 post V2 | Day 224-379 post V1 | Within 7 days of positive test |
| <b>Informed consent</b>                     | X*        | X                            |                   |                   |                     |                     |                                |
| <b>Safety bloods</b>                        |           | X                            | X                 | X                 |                     |                     | X                              |
| <b>Medical history</b>                      | X         |                              |                   |                   |                     |                     |                                |
| <b>Interim medical history</b>              |           | X                            | X                 | X                 | X                   | X                   | X                              |
| <b>Physical examination (as required)</b>   |           | (X)                          | (X)               | (X)               | (X)                 | (X)                 | X                              |
| <b>Urine test (Pregnancy) (if required)</b> |           | X                            | X                 |                   |                     |                     |                                |
| <b>COVID-19 vaccination</b>                 |           | X                            | X                 |                   |                     |                     |                                |
| <b>COVID-19 immunogenicity bloods</b>       |           | X                            | X                 | X                 | X                   | X                   | X                              |
| <b>SARS-Cov-2 viral swab</b>                |           |                              |                   |                   |                     |                     | X                              |
| <b>Diary card review</b>                    |           |                              | X                 | X                 |                     |                     | X                              |
| <b>SAE/AESI/Medically attended AE check</b> |           |                              | X                 | X                 | X                   | X                   | X                              |

\*Online Consent. Restricted to taking a limited medical history online, contacting the GP for further medical record if required and telephone screening visit(s)

## General cohort boosted at 84 days

|                                                                    | Screening | V1                           | V3                | V4                | V5                | V6                 | V7                  | (VPP)<br>Only if enter C19P    |
|--------------------------------------------------------------------|-----------|------------------------------|-------------------|-------------------|-------------------|--------------------|---------------------|--------------------------------|
| <b>Study timeline</b>                                              |           | D0                           | D56               | D84               | D112              | D182               | D364                | (D0-D364)                      |
| <b>Study window</b>                                                |           | Within 120 days of screening | Day 53–60 post V1 | Day 84-91 post V1 | Day 25–32 post V4 | Day 86-110 post V4 | Day 224-379 post V1 | Within 7 days of positive test |
| <b>Informed consent</b>                                            | X*        | X                            |                   | X**               |                   |                    |                     |                                |
| <b>Safety bloods</b>                                               |           | X                            |                   | X                 | X                 |                    |                     | X                              |
| <b>Medical history</b>                                             | X         |                              |                   |                   |                   |                    |                     |                                |
| <b>Interim medical history</b>                                     |           | X                            | X                 | X                 | X                 | X                  | X                   | X                              |
| <b>Physical examination (as required)</b>                          |           | (X)                          | (X)               | (X)               | (X)               | (X)                | (X)                 | X                              |
| <b>Urine test (Pregnancy) (if required)</b>                        |           | X                            |                   | X                 |                   |                    |                     |                                |
| <b>COVID-19 vaccination</b>                                        |           | X                            |                   | X                 |                   |                    |                     |                                |
| <b>COVID-19 immunogenicity bloods</b>                              |           | X                            | X                 | X                 | X                 | X                  | X                   | X                              |
| <b>Prophylactic paracetamol vs reactive paracetamol post-boost</b> |           |                              |                   | X                 |                   |                    |                     |                                |
| <b>SAM-strip***</b>                                                |           | X                            | X                 | X                 | X                 | X                  | X                   | X                              |
| <b>Saliva***</b>                                                   |           |                              | X                 | X                 | X                 | X                  | X                   | X                              |
| <b>SARS-Cov-2 viral swab</b>                                       |           |                              |                   |                   |                   |                    |                     | X                              |
| <b>Diary card review</b>                                           |           |                              | X                 | X                 |                   |                    |                     | X                              |
| <b>SAE/AESI/Medically attended AE check</b>                        |           |                              | X                 | X                 | X                 | X                  | X                   | X                              |

\*Online Consent. Restricted to taking a limited medical history online, contacting the GP for further medical record if required and telephone screening visit(s)

\*\* Optional consent for randomisation to prophylactic vs reactive paracetamol sub-study

\*\*\*Only from participants recruited at nominated sites

**Immunology cohort boosted at 28 days**

|                                                 | Screening | V1                              | V1A                    | V1B                   | V2                   | V2A                | V2B                   | V3                   | V5                         | V6                     | V7                     | (VPP)<br>Only if<br>enter C19P       |
|-------------------------------------------------|-----------|---------------------------------|------------------------|-----------------------|----------------------|--------------------|-----------------------|----------------------|----------------------------|------------------------|------------------------|--------------------------------------|
| <b>Study timeline</b>                           |           | <b>D0</b>                       | <b>D7</b>              | <b>D14</b>            | <b>D28</b>           | <b>D35</b>         | <b>D42</b>            | <b>D56</b>           | <b>D112<br/>(optional)</b> | <b>D182</b>            | <b>D364</b>            | <b>(D0-D364)</b>                     |
| <b>Study window</b>                             |           | Within<br>120 days<br>of screen | Day 5-<br>9<br>post V1 | Days 12–16<br>post V1 | Day 28–35<br>post V1 | Day 5–9<br>post V2 | Days 12–16<br>post V2 | Day 25–32<br>post V2 | Day 78–91<br>post V2       | Day 142-166<br>post V2 | Day 224-379<br>post V1 | Within 7<br>days of<br>positive test |
| <b>Informed consent</b>                         | X*        | X                               |                        |                       |                      |                    |                       |                      |                            |                        |                        |                                      |
| <b>Safety bloods</b>                            |           | X                               |                        |                       | X                    | X                  |                       | X                    |                            |                        |                        | X                                    |
| <b>Medical history</b>                          | X         |                                 |                        |                       |                      |                    |                       |                      |                            |                        |                        |                                      |
| <b>Interim medical<br/>history</b>              |           | X                               | X                      | X                     | X                    | X                  | X                     | X                    | X                          | X                      | X                      | X                                    |
| <b>Physical examination<br/>(as required)</b>   |           | (X)                             | (X)                    | (X)                   | (X)                  | (X)                | (X)                   | (X)                  | (X)                        | (X)                    | (X)                    | X                                    |
| <b>Urine test (pregnancy)<br/>(if required)</b> |           | (X)                             |                        |                       | (X)                  |                    |                       |                      |                            |                        |                        |                                      |
| <b>COVID-19 vaccination</b>                     |           | X                               |                        |                       | X                    |                    |                       |                      |                            |                        |                        |                                      |
| <b>COVID-19<br/>immunogenicity bloods</b>       |           | X                               | X                      | X                     | X                    | X                  | X                     | X                    | X                          | X                      | X                      | X                                    |
| <b>SAM-strip</b>                                |           | X                               | X                      | X                     | X                    | X                  | X                     | X                    | X                          | X                      | X                      | X                                    |
| <b>Saliva</b>                                   |           |                                 |                        |                       | X                    | X                  | X                     | X                    | X                          | X                      | X                      | X                                    |
| <b>SARS-CoV-2 viral<br/>swab</b>                |           |                                 |                        |                       |                      |                    |                       |                      |                            |                        |                        | X                                    |
| <b>Diary card review</b>                        |           |                                 | X                      | X                     | X                    | X                  | X                     | X                    |                            |                        |                        | X                                    |
| <b>SAE/AESI/Medically<br/>attended AE check</b> |           |                                 | X                      | X                     | X                    | X                  | X                     | X                    | X                          | X                      | X                      | X                                    |

\*Online Consent. Restricted to taking a limited medical history online, contacting the GP for further medical record if required and telephone screening visit(s)

**26 APPENDIX B: AMENDMENT HISTORY**

| Amendment No. | Protocol Version No. | Date issued | Author(s) of changes          | Details of Changes made                                                                                                                                                                                                                                                                                                                                                                                                                                                                                                                                                                                                                                                                                                                                                                                                                                                                                                                                                                                                                                                                                         |
|---------------|----------------------|-------------|-------------------------------|-----------------------------------------------------------------------------------------------------------------------------------------------------------------------------------------------------------------------------------------------------------------------------------------------------------------------------------------------------------------------------------------------------------------------------------------------------------------------------------------------------------------------------------------------------------------------------------------------------------------------------------------------------------------------------------------------------------------------------------------------------------------------------------------------------------------------------------------------------------------------------------------------------------------------------------------------------------------------------------------------------------------------------------------------------------------------------------------------------------------|
| 1             | 2.0                  | 28 Jan 2021 | R. Shaw/M. Snape/<br>A.Stuart | <p>Section 5 (synopsis) and 8</p> <p>Addition of day 14 for humoral immunity endpoints</p> <p>Removal of day 14 for anti-nucleocapsid IgG</p> <p>Section 10.3</p> <p>Exclusion criteria modified to remove reference to angioedema, and carrying of adrenaline pen, and to add:</p> <ul style="list-style-type: none"> <li>‘hypersensitivity to the active substance or any of the SmPC-listed ingredients of the Pfizer vaccine)’</li> </ul> <p>Section 13.1</p> <p>Safety reporting period modified to commence from time of consent, rather than enrolment</p> <p>Section 11.7.1.3 Amended to state that swabs taken for SARS-CoV-2 testing at the C19P visit will be processed centrally, and not at local sites.</p> <p>Appendix D</p> <p>Changes to allocation of blood for serology (3 aliquots rather than 2 aliquots) and cellular immunology (2 aliquots rather than 3 aliquots) in the general cohorts</p> <p>Removal of ICS for C19 pathway in general cohorts</p> <p>Addition of humoral immunity endpoints for Day 14 bloods in immunology cohort</p> <p>Removal of D14 anti-nucleocapsid IgG</p> |
| 2             | 2.1                  | 10-Feb-2021 | R.Shaw                        | <p>Modification of section 7.2.1 and tables in section 28 Appendix D: Blood sampling, to change blood volumes to ‘up to’. Safety blood volumes changed to allow variation between sites’ local laboratory SOPs.</p> <p>Tables in section 25 Appendix A: Schedule of Procedures amended as SAE checks occur at each visit but had been omitted from two.</p>                                                                                                                                                                                                                                                                                                                                                                                                                                                                                                                                                                                                                                                                                                                                                     |
| 3             | 3.0                  | 09-Mar-2021 | R.Shaw                        | <p>Addition of saliva samples</p> <p>Addition of optional D112 visit to immunology cohort</p> <p>Update of background information of COVID and COVID vaccines</p> <p>Update of WHO advice surrounding vaccine scheduling</p> <p>Addition of CRP gradings</p> <p>Typographical errors and clarity including blood sample tables</p>                                                                                                                                                                                                                                                                                                                                                                                                                                                                                                                                                                                                                                                                                                                                                                              |
| 4             | 3.1                  | 29-Mar-2021 | R.Shaw                        | <p>Removal of laboratory names from appendix D to allow flexibility due to lab capacity limits.</p>                                                                                                                                                                                                                                                                                                                                                                                                                                                                                                                                                                                                                                                                                                                                                                                                                                                                                                                                                                                                             |

|    |     |             |                                     |                                                                                                                                                                                                                                                                                                                                                                                                                                                                                                                                                                                                                                                                                                 |
|----|-----|-------------|-------------------------------------|-------------------------------------------------------------------------------------------------------------------------------------------------------------------------------------------------------------------------------------------------------------------------------------------------------------------------------------------------------------------------------------------------------------------------------------------------------------------------------------------------------------------------------------------------------------------------------------------------------------------------------------------------------------------------------------------------|
| 5  | 4.0 | 14-Apr-2021 | A.Stuart<br>X.Liu<br>E.Plested      | Removal and replacement of Elizabeth Williamson on the DSMB membership list. Replaced with Krishnan Bhaskaran. E. Williamson stepped down due to a conflict of interest.<br>Adding the reactogenicity interim analysis.<br>Correction of an error in the randomisation section.<br>6.2.8 Potential Risks - updated with emerging Thrombosis with Thrombocytopenia Association with vaccination                                                                                                                                                                                                                                                                                                  |
| 6  | 5.0 | 26-APR-2021 |                                     | Addition of randomisation to prophylactic versus reactive paracetamol for the boost dose in the 84 day interval groups.<br>Addition of impact on daily living questions to diary card for participants in the day 84 interval groups<br>Removal of sample tube numbers and colour from appendix D. This will be documented in the Lab Analysis Plan rather than the study protocol. The overall volumes remain unchanged.                                                                                                                                                                                                                                                                       |
| 7  | 6.0 | 19-May-2021 | X.Liu, A. Stuart, R. Shaw, N. Singh | Update of the statistics section to align with the statistical analysis plan, typographical error in D182 window of Appendix A (General 84). Removal of Anti-nucleocapsid from D112 visits (due to current low incidence of COVID in the general population).                                                                                                                                                                                                                                                                                                                                                                                                                                   |
| 8  | 7.0 | 08/06/2021  | R.Shaw<br>A.Stuart                  | Addition of mass unblinding option in section 11.5 and, clarification of wording on unblinding in 11. 8.                                                                                                                                                                                                                                                                                                                                                                                                                                                                                                                                                                                        |
| 10 | 8.0 | 29/07/2021  | A.Stuart<br>R.Shaw                  | Addition of section 11.6.4 – explanation of trial management of participant visits should third dose boosts be offered through the national immunisation programme<br>Appendix A – change to visit window for V7<br>5 – Synopsis – total study duration changed to 8-12 months per participant<br>13.1 – change to individual participant SAE and AESI reporting time window to last study visit rather than 12 months<br>Updating of AZ storage 12.141 sections as well as Safety information (section 13) and DSUR section 13.11 in light of update from Investigator's brochure to Summary of Product Characteristics equivalent documentation for regulation 174 licensed medicinal product |
| 11 | 9.0 | 07/09/2021  | R. Shaw                             | Sections 12.1.4.2 and 13.8.1.2 updated as per updated Pfizer SmPC (11-Aug-2021) and AstraZeneca SmPC (19-Jul-2021)                                                                                                                                                                                                                                                                                                                                                                                                                                                                                                                                                                              |



|  |  |  |  |                                                                                                          |
|--|--|--|--|----------------------------------------------------------------------------------------------------------|
|  |  |  |  | Section 13.11 updated to clarify DSUR reporting                                                          |
|  |  |  |  | Sections 13.8.2.1. and 13.8.2.2 – adverse events for AZ and Pfizer vaccines updated as per updated SmPCs |

**27 APPENDIX C: Toxicity grading scale for lab AEs**

|                                  |                           | Units                | Lab range | Grade 1                | Grade 2                 | Grade 3                | Grade 4           |
|----------------------------------|---------------------------|----------------------|-----------|------------------------|-------------------------|------------------------|-------------------|
| <b>Haematology</b>               |                           |                      |           |                        |                         |                        |                   |
| Haemoglobin Absolute             | Male                      | g/l                  | 130-170   | 115-125                | 100-114                 | 85-99                  | <85               |
| Haemoglobin Absolute             | Female                    | g/l                  | 120-150   | 105-113                | 90-104                  | 80-89                  | <80               |
| Haemoglobin change from baseline |                           |                      | n/a       | 10-15                  | 16-20                   | 21-50                  | >50               |
| White Blood Cells                | Elevated                  | x 10 <sup>9</sup> /L | 11.00     | 11.50-15.00            | 15.01-20.00             | 20.01-25.00            | >25.00            |
| White Blood Cells                | Low                       | x 10 <sup>9</sup> /L | 4.00      | 2.50-3.50              | 1.50-2.49               | 1.00-1.49              | <1.00             |
| Platelets                        | Low                       | x 10 <sup>9</sup> /L | 150-400   | 125-140                | 100-124                 | 25-99                  | <25               |
| Neutrophils                      | Low                       | x 10 <sup>9</sup> /L | 2.00-7.00 | 1.50-1.99              | 1.00-1.49               | 0.50-0.99              | <0.50             |
| Lymphocytes                      | Low                       | x 10 <sup>9</sup> /L | 1.00-4.00 | 0.75-0.99              | 0.50-0.74               | 0.25-0.49              | <0.25             |
| Eosinophils                      | Elevated                  | x 10 <sup>9</sup> /L | 0.02-0.50 | 0.65-1.50              | 1.51-5.00               | >5.00                  | Hypereosinophilia |
| <b>Biochemistry</b>              |                           |                      |           |                        |                         |                        |                   |
| Sodium                           | Elevated                  | mmol/L               | 145       | 146-147                | 148-149                 | 150-155                | >155              |
| Sodium                           | Low                       | mmol/L               | 135       | 132-134                | 130-131                 | 125-129                | <125              |
| Potassium                        | Elevated                  | mmol/L               | 5.0       | 5.1-5.2                | 5.3-5.4                 | 5.5-6.5                | >6.5              |
| Potassium                        | Low                       | mmol/L               | 3.5       | 3.2-3.3                | 3.1                     | 2.5-3.0                | <2.5              |
| Urea                             | Elevated                  | mmol/L               | 2.5-7.4   | 8.2-9.3                | 9.4-11.0                | >11.0                  | Requires dialysis |
| Creatinine                       | Elevated                  | □mol/L               | 49-104    | 1.1-1.5xULN<br>114-156 | >1.5-3.0xULN<br>157-312 | >3.0xULN<br>>312       | Requires dialysis |
| Bilirubin                        | Elevated<br>Normal LFTs   | □mol/L               | 0-21      | 1.1-1.5xULN<br>23-32   | >1.5-2xULN<br>33-42     | >2-3xULN<br>43-63      | >3xULN<br>>63     |
| Bilirubin                        | Elevated<br>Abnormal LFTs | □mol/L               | 0-21      | 1.1-1.25xULN<br>23-26  | >1.25-1.5xULN<br>27-32  | >1.5-1.75xULN<br>33-37 | >1.75xULN<br>>37  |
| ALT                              | Elevated                  | IU/L                 | 10-45     | 1.1-2.5xULN<br>49-112  | >2.5-5xULN<br>113-225   | >5-10xULN<br>226-450   | >10xULN<br>>450   |
| ALP (Alkaline phosphatase)       | Elevated                  | IU/L                 | 30-130    | 1.1-2xULN<br>143-260   | >2-3xULN<br>261-390     | >3-10xULN<br>391-1300  | >10xULN<br>>1300  |
| Albumin                          | Low                       | g/L                  | 32-50     | 28-31                  | 25-27                   | <25                    | -                 |
| CRP                              | Elevated                  | mg/L                 | 0-10      | 11-30                  | 31-100                  | 101-200                | >200              |

Normal ranges may vary between sites and gradings may be adapted between sites

1 **28 APPENDIX D BLOOD SAMPLING**2 **General Cohort – 28 day boost**

|                                     | V1                                                                                                                                                                                      | V2                                                                                            | V3                                                                          | V6                                                                                            | V7                                                                                            | (VPP)<br>Only if enter C19P                                                                   |
|-------------------------------------|-----------------------------------------------------------------------------------------------------------------------------------------------------------------------------------------|-----------------------------------------------------------------------------------------------|-----------------------------------------------------------------------------|-----------------------------------------------------------------------------------------------|-----------------------------------------------------------------------------------------------|-----------------------------------------------------------------------------------------------|
| <b>Study timeline</b>               | <b>D0</b>                                                                                                                                                                               | <b>D28</b>                                                                                    | <b>D56</b>                                                                  | <b>D182</b>                                                                                   | <b>D364</b>                                                                                   | <b>(D0-D364)</b>                                                                              |
| <b>Safety bloods</b>                | 1 x FBC (up to 2ml)<br>1 x Biochem (up to 5ml)                                                                                                                                          | 1 x FBC (up to 2ml)<br>1 x Biochem (up to 5ml)                                                | 1 x FBC (up to 2ml)<br>1 x Biochem (up to 5ml)                              |                                                                                               |                                                                                               | 1 x FBC (up to 2ml)<br>1 x biochem (up to 5ml)                                                |
| <b>COVID-19 vaccination</b>         | <b>X</b>                                                                                                                                                                                | <b>X</b>                                                                                      |                                                                             |                                                                                               |                                                                                               |                                                                                               |
| <b>Primary endpoint</b>             |                                                                                                                                                                                         |                                                                                               | Anti-spike IgG                                                              |                                                                                               |                                                                                               |                                                                                               |
| <b>Secondary endpoints</b>          | Anti-spike IgG<br>Neutralising Abs<br>Anti-nucleocapsid IgG<br>Pseudo-neut Abs<br><br>ELIspot                                                                                           | Anti-spike IgG<br>Neutralising Abs<br>Anti-nucleocapsid IgG<br>Pseudo-neut Abs<br><br>ELIspot | Neutralising Abs<br>Anti-nucleocapsid IgG<br>Pseudo-neut Abs<br><br>ELIspot | Anti-spike IgG<br>Neutralising Abs<br>Anti-nucleocapsid IgG<br>Pseudo-neut Abs<br><br>ELIspot | Anti-spike IgG<br>Neutralising Abs<br>Anti-nucleocapsid IgG<br>Pseudo-neut Abs<br><br>ELIspot | Anti-spike IgG<br>Neutralising Abs<br>Anti-nucleocapsid IgG<br>Pseudo-neut Abs<br><br>ELIspot |
| <b>Total volume per visit</b>       | Up to 57ml                                                                                                                                                                              | Up to 57ml                                                                                    | Up to 57ml                                                                  | Up to 50ml                                                                                    | Up to 50ml                                                                                    | Up to 57ml                                                                                    |
| <b>Total volume by end of study</b> | At any point in the study, a repeat of safety bloods may be recommended at the clinical discretion of the investigator. This will result in up to an extra 7ml per repeat blood sample. |                                                                                               |                                                                             |                                                                                               | Up to 271ml                                                                                   | + Up to 57ml per C-19 pathway attended                                                        |

3  
4  
5  
6  
7  
8  
9  
10  
11  
12  
13  
14  
15

16 **General Cohort – 84 day boost**

|                                     | V1                                                                                                                                                                                      | V3                                                                                            | V4                                                                                            | V5                                                                   | V6                                                                                            | V7                                                                                            | (VPP)<br>Only if enter C19P                                                                   |
|-------------------------------------|-----------------------------------------------------------------------------------------------------------------------------------------------------------------------------------------|-----------------------------------------------------------------------------------------------|-----------------------------------------------------------------------------------------------|----------------------------------------------------------------------|-----------------------------------------------------------------------------------------------|-----------------------------------------------------------------------------------------------|-----------------------------------------------------------------------------------------------|
| <b>Study timeline</b>               | <b>D0</b>                                                                                                                                                                               | <b>D56</b>                                                                                    | <b>D84</b>                                                                                    | <b>D112</b>                                                          | <b>D182</b>                                                                                   | <b>D364</b>                                                                                   | <b>(D0-D364)</b>                                                                              |
| <b>Safety bloods</b>                | 1xFBC (up to 2ml)<br>1xBiochem (up to 5ml)                                                                                                                                              |                                                                                               | 1xFBC (up to 2ml)<br>1xBiochem (up to 5ml)                                                    | 1xFBC (up to 2ml)<br>1xBiochem (up to 5ml)                           |                                                                                               |                                                                                               | 1xFBC (up to 2ml)<br>1xBiochem (up to 5ml)                                                    |
| <b>COVID-19 vaccination</b>         | <b>X</b>                                                                                                                                                                                |                                                                                               | <b>X</b>                                                                                      |                                                                      |                                                                                               |                                                                                               |                                                                                               |
| <b>Secondary endpoints</b>          | Anti-spike IgG<br>Neutralising Abs<br>Anti-nucleocapsid IgG<br>Pseudo-neut Abs<br><br>ELIspot                                                                                           | Anti-spike IgG<br>Neutralising Abs<br>Anti-nucleocapsid IgG<br>Pseudo-neut Abs<br><br>ELIspot | Anti-spike IgG<br>Neutralising Abs<br>Anti-nucleocapsid IgG<br>Pseudo-neut Abs<br><br>ELIspot | Anti-spike IgG<br>Neutralising Abs<br>Pseudo-neut Abs<br><br>ELIspot | Anti-spike IgG<br>Neutralising Abs<br>Anti-nucleocapsid IgG<br>Pseudo-neut Abs<br><br>ELIspot | Anti-spike IgG<br>Neutralising Abs<br>Anti-nucleocapsid IgG<br>Pseudo-neut Abs<br><br>ELIspot | Anti-spike IgG<br>Neutralising Abs<br>Anti-nucleocapsid IgG<br>Pseudo-neut Abs<br><br>ELIspot |
| <b>Total volume per visit</b>       | Up to 57ml                                                                                                                                                                              | Up to 50ml                                                                                    | Up to 57ml                                                                                    | Up to 57ml                                                           | Up to 50ml                                                                                    | Up to 50ml                                                                                    | Up to 57ml                                                                                    |
| <b>Total volume by end of study</b> | At any point in the study, a repeat of safety bloods may be recommended at the clinical discretion of the investigator. This will result in up to an extra 7ml per repeat blood sample. |                                                                                               |                                                                                               |                                                                      |                                                                                               | Up to 321ml                                                                                   | + Up to 57ml per C-19 pathway attended                                                        |

17  
18  
19  
20  
21  
22  
23  
24  
25  
26  
27  
28  
29  
30  
31  
32

## 33 Immunology Cohort (28 day boost)

|                                 | V1                                                                                                                                                                                      | V1A            | V1B                                                                           | V2                                                                               | V2A            | V2B                         | V3                                                             | V5                                                                 | V6                                                                               | V7                                                                               | (VPP)<br>Only if C19P                                                                   |
|---------------------------------|-----------------------------------------------------------------------------------------------------------------------------------------------------------------------------------------|----------------|-------------------------------------------------------------------------------|----------------------------------------------------------------------------------|----------------|-----------------------------|----------------------------------------------------------------|--------------------------------------------------------------------|----------------------------------------------------------------------------------|----------------------------------------------------------------------------------|-----------------------------------------------------------------------------------------|
| <b>Study timeline</b>           | <b>D0</b>                                                                                                                                                                               | <b>D7</b>      | <b>D14</b>                                                                    | <b>D28</b>                                                                       | <b>D35</b>     | <b>D42</b>                  | <b>D56</b>                                                     | <b>D112 (optional)</b>                                             | <b>D182</b>                                                                      | <b>D364</b>                                                                      | <b>(D0-D364)</b>                                                                        |
| <b>Safety bloods</b>            | X                                                                                                                                                                                       |                |                                                                               | X                                                                                | X              |                             | X                                                              |                                                                    |                                                                                  |                                                                                  | X                                                                                       |
| <b>COVID-19 vaccination</b>     | X                                                                                                                                                                                       |                |                                                                               | X                                                                                |                |                             |                                                                |                                                                    |                                                                                  |                                                                                  |                                                                                         |
| <b>Primary endpoint</b>         |                                                                                                                                                                                         |                |                                                                               |                                                                                  |                |                             | Anti-spike IgG                                                 |                                                                    |                                                                                  |                                                                                  |                                                                                         |
| <b>Secondary endpoints</b>      | Anti-spike IgG<br>Neutralising Ab<br>Anti-N IgG<br>Pseudo-neut Ab<br><br>ELISpot<br>ICS                                                                                                 | Anti-spike IgG | Anti-spike IgG<br>Neutralising Ab<br><br>Pseudo-neut Ab<br><br>ELISpot<br>ICS | Anti-spike IgG<br>Neutralising Ab<br>Anti-N IgG<br>Pseudo-neut Ab<br><br>ELISpot | Anti-spike IgG | Serum<br><br>ELISpot<br>ICS | Neutralising Ab<br>Anti-N IgG<br>Pseudo-neut Ab<br><br>ELISpot | Anti-spike IgG<br>Neutralising Ab<br>Pseudo-neut Ab<br><br>ELISpot | Anti-spike IgG<br>Neutralising Ab<br>Anti-N IgG<br>Pseudo-neut Ab<br><br>ELISpot | Anti-spike IgG<br>Neutralising Ab<br>Anti-N IgG<br>Pseudo-neut Ab<br><br>ELISpot | Anti-spike IgG<br>Neutralising Ab<br>Anti-N IgG<br>Pseudo-neut Ab<br><br>ELISpot<br>ICS |
| <b>Total volume per visit</b>   | Up to 77ml                                                                                                                                                                              | Up to 20ml     | Up to 70ml                                                                    | Up to 57ml                                                                       | Up to 27ml     | Up to 70ml                  | Up to 57ml                                                     | Up to 50ml                                                         | Up to 50ml                                                                       | Up to 50ml                                                                       | Up to 77ml                                                                              |
| <b>Total volume (study end)</b> | At any point in the study, a repeat of safety bloods may be recommended at the clinical discretion of the investigator. This will result in up to an extra 7ml per repeat blood sample. |                |                                                                               |                                                                                  |                |                             |                                                                |                                                                    | Up to 528ml                                                                      |                                                                                  | + Up to 77ml per C-19P attended                                                         |

34

35
